# Supplementary material for: Genomic profiling of human vascular cells identifies TWIST1 as a causal gene for common vascular diseases
Source: PLoS Genet. 2020 Jan 9;16(1):e1008538. doi: 10.1371/journal.pgen.1008538 (PMC6975560; doi:10.1371/journal.pgen.1008538)
Supplement: S2 File — Differential Gene Expression file includes the list of genes that are differentially expressed between HCAECs and HCASMCs with |log2(fold change)|>2 and adjusted p-value < 0.001. (XLSX) [file pgen.1008538.s002.xlsx]

## Sheet: Sheet1
ensembl_gene_id	hgnc_symbol	baseMean	log2FoldChange	lfcSE	stat	p_value	p_value_adj
ENSG00000138722	MMRN1	77613.6	-11.8691	0.301968	-39.3059	0	0
ENSG00000074660	SCARF1	4605.14	-7.39871	0.168153	-43.9998	0	0
ENSG00000162576	MXRA8	7461.57	6.95914	0.164548	42.2923	0	0
ENSG00000105483	CARD8	10338.2	-2.77988	0.0751612	-36.9856	1.95053e-299	9.36581e-296
ENSG00000108622	ICAM2	17427.5	-8.18757	0.229049	-35.7459	7.65009e-280	3.14856e-276
ENSG00000010327	STAB1	19003.6	-7.12511	0.19969	-35.6808	7.84101e-279	2.82374e-275
ENSG00000007866	TEAD3	2069.88	5.32552	0.154593	34.4486	4.72285e-260	1.51184e-256
ENSG00000224383	PRR29	13962.6	-7.50491	0.218261	-34.3851	4.21489e-259	1.21431e-255
ENSG00000084636	COL16A1	15004.4	8.38299	0.252665	33.1782	2.22082e-241	5.81653e-238
ENSG00000171056	SOX7	2383.28	-4.11829	0.124335	-33.1226	1.40649e-240	3.11699e-237
ENSG00000130307	USHBP1	519.424	-6.00269	0.185156	-32.4196	1.45251e-230	2.98907e-227
ENSG00000100060	MFNG	5073.11	-10.9587	0.338326	-32.3908	3.69523e-230	7.09731e-227
ENSG00000171914	TLN2	743.329	4.24022	0.132142	32.0882	6.43288e-226	1.15832e-222
ENSG00000186105	LRRC70	1390.97	-6.8405	0.213582	-32.0276	4.50605e-225	7.63643e-222
ENSG00000169291	SHE	5669.75	-9.51801	0.29838	-31.8989	2.76114e-223	4.41935e-220
ENSG00000172379	ARNT2	1251.99	7.23139	0.22913	31.5601	1.30131e-218	1.9732e-215
ENSG00000123384	LRP1	30039.6	7.28045	0.236251	30.8166	1.57035e-208	2.26208e-205
ENSG00000106333	PCOLCE	9954.7	6.76965	0.222089	30.4818	4.54844e-204	6.24002e-201
ENSG00000003147	ICA1	1214.93	-9.54755	0.315954	-30.2182	1.36536e-200	1.788e-197
ENSG00000095370	SH2D3C	1606.36	-8.94256	0.307087	-29.1206	1.97088e-186	2.46875e-183
ENSG00000100417	PMM1	1783.42	2.38025	0.0824147	28.8814	2.04304e-183	2.4525e-180
ENSG00000134853	PDGFRA	8592.3	8.10242	0.286395	28.291	4.45464e-176	5.13353e-173
ENSG00000162367	TAL1	3378.29	-10.2392	0.368871	-27.7582	1.38877e-169	1.53887e-166
ENSG00000224729	PCOLCE-AS1	2892.7	8.36196	0.302492	27.6436	3.33379e-168	3.55728e-165
ENSG00000198121	LPAR1	5554.03	7.56997	0.274003	27.6273	5.2258e-168	5.37698e-165
ENSG00000204301	NOTCH4	4927.28	-6.56618	0.240049	-27.3535	9.80401e-165	9.73977e-162
ENSG00000103888	CEMIP	14204.6	8.83002	0.32398	27.2548	1.45696e-163	1.39917e-160
ENSG00000172346	CSDC2	424.664	2.51872	0.0927483	27.1565	2.1239e-162	1.97386e-159
ENSG00000102010	BMX	3100.07	-11.0605	0.423248	-26.1325	1.55955e-150	1.32149e-147
ENSG00000133574	GIMAP4	4644.87	-11.4801	0.439463	-26.1229	2.00095e-150	1.64707e-147
ENSG00000088387	DOCK9	9287.96	-3.41292	0.131192	-26.0147	3.37987e-149	2.70483e-146
ENSG00000149781	FERMT3	4123.92	-4.63978	0.178661	-25.9698	1.0862e-148	8.45765e-146
ENSG00000167680	SEMA6B	5605.46	-8.21621	0.320837	-25.6086	1.22211e-144	9.02795e-142
ENSG00000110799	VWF	13989.9	-10.5874	0.413948	-25.5767	2.76852e-144	1.94539e-141
ENSG00000121753	ADGRB2	825.426	3.58728	0.140843	25.4701	4.23188e-143	2.83536e-140
ENSG00000154783	FGD5	7893.16	-8.62452	0.339569	-25.3984	2.62545e-142	1.71907e-139
ENSG00000143434	SEMA6C	506.995	-3.39928	0.134544	-25.2653	7.69289e-141	4.81809e-138
ENSG00000142156	COL6A1	54083.6	5.51437	0.219566	25.1148	3.42637e-139	2.10029e-136
ENSG00000116132	PRRX1	3968.62	8.08115	0.323012	25.0181	3.88242e-138	2.28271e-135
ENSG00000130787	HIP1R	3943.2	-2.77857	0.111489	-24.9224	4.25191e-137	2.44995e-134
ENSG00000135916	ITM2C	3555.44	4.5377	0.182121	24.9158	5.01148e-137	2.831e-134
ENSG00000197614	MFAP5	24152.4	9.69135	0.390704	24.8048	7.94917e-136	4.40415e-133
ENSG00000144320	KIAA1715	2464.46	2.43073	0.0983598	24.7126	7.8287e-135	4.17675e-132
ENSG00000121440	PDZRN3	630.116	9.49411	0.384959	24.6627	2.69038e-134	1.40927e-131
ENSG00000111490	TBC1D30	675.197	-5.15625	0.209164	-24.6517	3.52579e-134	1.81389e-131
ENSG00000150048	CLEC1A	878.841	-10.3437	0.420515	-24.5976	1.34045e-133	6.77515e-131
ENSG00000113389	NPR3	2104.73	9.56332	0.389908	24.5271	7.58823e-133	3.70537e-130
ENSG00000149573	MPZL2	6219.1	-8.60155	0.351448	-24.4746	2.75628e-132	1.32347e-129
ENSG00000153823	PID1	4027.46	7.92853	0.323974	24.4728	2.88042e-132	1.36041e-129
ENSG00000128833	MYO5C	721.452	-6.99731	0.286024	-24.464	3.56843e-132	1.65817e-129
ENSG00000027075	PRKCH	6898.11	-4.93788	0.202391	-24.3977	1.80918e-131	8.27339e-129
ENSG00000147251	DOCK11	1535.91	5.33658	0.218822	24.3878	2.30284e-131	1.03664e-128
ENSG00000197555	SIPA1L1	9081.09	2.54304	0.104599	24.3124	1.44969e-130	6.42549e-128
ENSG00000198844	ARHGEF15	1558.32	-9.87078	0.411409	-23.9926	3.32005e-127	1.40663e-124
ENSG00000141424	SLC39A6	1874.63	2.43396	0.101622	23.9511	8.99786e-127	3.75693e-124
ENSG00000227954	TARID	414.652	9.42712	0.393837	23.9366	1.27373e-126	5.24232e-124
ENSG00000068001	HYAL2	11457.8	-3.03621	0.12714	-23.8809	4.83952e-126	1.96375e-123
ENSG00000074410	CA12	7515.49	5.6518	0.240135	23.5359	1.74869e-122	6.90133e-120
ENSG00000167779	IGFBP6	9592.67	4.95093	0.211212	23.4405	1.65167e-121	6.43034e-119
ENSG00000163637	PRICKLE2	1356.48	2.62446	0.112177	23.3956	4.74202e-121	1.82157e-118
ENSG00000139567	ACVRL1	16234.1	-3.78014	0.162355	-23.2832	6.55969e-120	2.48664e-117
ENSG00000103966	EHD4	2425.25	-3.07945	0.132445	-23.2508	1.3969e-119	5.22659e-117
ENSG00000184916	JAG2	2613.71	-6.43039	0.278936	-23.0533	1.36426e-117	4.97523e-115
ENSG00000105967	TFEC	1124.04	-6.82241	0.296109	-23.0401	1.84654e-117	6.64987e-115
ENSG00000182326	C1S	15308.6	7.57347	0.329117	23.0115	3.57621e-117	1.27198e-114
ENSG00000046889	PREX2	1846.71	-12.3927	0.539375	-22.976	8.10087e-117	2.84617e-114
ENSG00000169242	EFNA1	1491.36	-5.57549	0.243288	-22.9172	3.12819e-116	1.08582e-113
ENSG00000124813	RUNX2	627.693	7.09342	0.310636	22.8351	2.05365e-115	6.96067e-113
ENSG00000163531	NFASC	2667.97	8.33368	0.365995	22.7699	9.10813e-115	3.01615e-112
ENSG00000151883	PARP8	917.097	6.17891	0.272305	22.6911	5.48209e-114	1.75488e-111
ENSG00000166963	MAP1A	13299	4.58032	0.203353	22.524	2.41598e-112	7.64882e-110
ENSG00000163762	TM4SF18	1124.21	-10.4513	0.466204	-22.4178	2.64129e-111	8.27125e-109
ENSG00000121690	DEPDC7	129.136	4.61487	0.207854	22.2024	3.25362e-109	9.86704e-107
ENSG00000185339	TCN2	2458.19	-3.46889	0.156365	-22.1845	4.8443e-109	1.45379e-106
ENSG00000165617	DACT1	3110.5	7.79736	0.351799	22.1643	7.59973e-109	2.2572e-106
ENSG00000104321	TRPA1	971.855	9.11606	0.412421	22.1038	2.90558e-108	8.5418e-106
ENSG00000067141	NEO1	971.492	6.78713	0.307767	22.0528	8.97359e-108	2.58529e-105
ENSG00000163788	SNRK	7893.18	-2.94806	0.133705	-22.0489	9.78333e-108	2.79067e-105
ENSG00000138772	ANXA3	6521.38	-4.4952	0.204093	-22.0253	1.64954e-107	4.65913e-105
ENSG00000164867	NOS3	3884.92	-5.99172	0.272947	-21.952	8.2941e-107	2.31993e-104
ENSG00000168918	INPP5D	2082.55	-5.70412	0.259946	-21.9435	9.99199e-107	2.76797e-104
ENSG00000138604	GLCE	19988.1	-2.88966	0.131927	-21.9036	2.40278e-106	6.59278e-104
ENSG00000164619	BMPER	1013.16	7.09336	0.325553	21.7886	2.97372e-105	8.0068e-103
ENSG00000184838	PRR16	1111.69	5.85244	0.268607	21.7881	3.00811e-105	8.02442e-103
ENSG00000142173	COL6A2	41829	8.10573	0.373615	21.6954	2.26826e-104	5.88725e-102
ENSG00000155849	ELMO1	1307.42	-8.19747	0.379925	-21.5765	2.98368e-103	7.54034e-101
ENSG00000137691	C11orf70	234.714	6.12641	0.285398	21.4662	3.22005e-102	8.06693e-100
ENSG00000059378	PARP12	3437.46	-2.22631	0.103726	-21.4634	3.42128e-102	8.49717e-100
ENSG00000102265	TIMP1	62481.3	3.61174	0.169414	21.3191	7.55432e-101	1.86017e-98
ENSG00000091986	CCDC80	79240.7	6.16731	0.28949	21.304	1.042e-100	2.54407e-98
ENSG00000124772	CPNE5	361.838	-6.38017	0.299754	-21.2847	1.57406e-100	3.77906e-98
ENSG00000114383	TUSC2	6398.83	-2.56521	0.120611	-21.2685	2.22192e-100	5.29037e-98
ENSG00000129422	MTUS1	13585.2	-7.21078	0.339697	-21.2271	5.36843e-100	1.26774e-97
ENSG00000121578	B4GALT4	3844.06	3.33256	0.157378	21.1755	1.6054e-99	3.72996e-97
ENSG00000189152	GRAPL	459.75	-5.02831	0.237647	-21.1587	2.29258e-99	5.28394e-97
ENSG00000197183	NOL4L	1081.11	-2.18349	0.103244	-21.1488	2.8315e-99	6.42328e-97
ENSG00000147100	SLC16A2	3589.42	4.73371	0.224344	21.1003	7.90706e-99	1.77971e-96
ENSG00000143847	PPFIA4	1120.57	7.19766	0.341705	21.0639	1.70368e-98	3.80489e-96
ENSG00000101331	CCM2L	370.962	-10.1558	0.483395	-21.0092	5.39854e-98	1.1964e-95
ENSG00000092096	SLC22A17	400.908	3.33946	0.159326	20.9599	1.52476e-97	3.35331e-95
ENSG00000189184	PCDH18	2836.16	7.21021	0.344035	20.9578	1.59409e-97	3.47922e-95
ENSG00000124212	PTGIS	6725.9	5.98309	0.285994	20.9204	3.49413e-97	7.51238e-95
ENSG00000114270	COL7A1	1092.61	5.88563	0.282453	20.8376	1.97689e-96	4.18782e-94
ENSG00000123989	CHPF	1883.33	7.06304	0.339171	20.8245	2.5985e-96	5.46444e-94
ENSG00000071073	MGAT4A	918.12	-8.45996	0.407253	-20.7732	7.55875e-96	1.55548e-93
ENSG00000136235	GPNMB	2613.23	6.49841	0.314089	20.6897	4.28884e-95	8.76323e-93
ENSG00000099282	TSPAN15	1551.1	-6.85103	0.333372	-20.5507	7.58919e-94	1.51837e-91
ENSG00000158296	SLC13A3	148.24	6.20216	0.302293	20.517	1.51672e-93	3.01357e-91
ENSG00000156298	TSPAN7	308.491	-7.10078	0.346866	-20.4712	3.88653e-93	7.5656e-91
ENSG00000149090	PAMR1	4964.72	8.72011	0.425965	20.4714	3.87126e-93	7.5656e-91
ENSG00000166147	FBN1	123898	3.72436	0.182635	20.3924	1.95318e-92	3.70205e-90
ENSG00000164616	FBXL21	394.67	10.7764	0.528576	20.3876	2.15653e-92	4.0344e-90
ENSG00000146648	EGFR	3504.97	3.51849	0.172913	20.3483	4.80218e-92	8.92586e-90
ENSG00000157570	TSPAN18	1080	-8.6421	0.425174	-20.326	7.56866e-92	1.38887e-89
ENSG00000173918	C1QTNF1	5675	5.30601	0.261464	20.2935	1.46903e-91	2.67865e-89
ENSG00000079337	RAPGEF3	1374.43	-3.13063	0.154558	-20.2553	3.18927e-91	5.77879e-89
ENSG00000104611	SH2D4A	1305.96	5.51724	0.272565	20.2419	4.18325e-91	7.53246e-89
ENSG00000166173	LARP6	1786.4	2.15423	0.106569	20.2145	7.30265e-91	1.30677e-88
ENSG00000160796	NBEAL2	4917.04	-3.41485	0.169844	-20.1058	6.56332e-90	1.15298e-87
ENSG00000143369	ECM1	5284.1	4.37174	0.217554	20.095	8.16646e-90	1.41732e-87
ENSG00000154133	ROBO4	28787.7	-6.91639	0.344246	-20.0914	8.77416e-90	1.51367e-87
ENSG00000120708	TGFBI	231385	4.25594	0.212378	20.0395	2.49191e-89	4.12597e-87
ENSG00000131067	GGT7	633.191	3.45709	0.173122	19.9691	1.02241e-88	1.67362e-86
ENSG00000123610	TNFAIP6	979.608	7.70469	0.385938	19.9635	1.14304e-88	1.86051e-86
ENSG00000132334	PTPRE	2768.26	-5.68908	0.285126	-19.9529	1.4147e-88	2.28975e-86
ENSG00000197635	DPP4	8425.66	4.09592	0.205943	19.8886	5.1076e-88	8.175e-86
ENSG00000113721	PDGFRB	3375.03	7.87659	0.396094	19.8857	5.41729e-88	8.62277e-86
ENSG00000071246	VASH1	2563.98	-3.09897	0.155868	-19.882	5.82095e-88	9.21437e-86
ENSG00000105649	RAB3A	296.081	2.88813	0.145294	19.8778	6.33861e-88	9.97898e-86
ENSG00000185761	ADAMTSL5	450.275	5.56863	0.28049	19.8532	1.03382e-87	1.61871e-85
ENSG00000136010	ALDH1L2	14383.9	5.06963	0.255416	19.8485	1.13499e-87	1.76751e-85
ENSG00000115602	IL1RL1	14086.3	-7.42486	0.375336	-19.7819	4.266e-87	6.60771e-85
ENSG00000111962	UST	560.531	5.55399	0.280779	19.7806	4.37076e-87	6.73377e-85
ENSG00000172986	GXYLT2	956.155	3.63118	0.183801	19.756	7.11978e-87	1.09107e-84
ENSG00000159403	C1R	12654.8	5.72706	0.290479	19.7159	1.5745e-86	2.40008e-84
ENSG00000197943	PLCG2	543.515	-6.10918	0.3104	-19.6816	3.09822e-86	4.69788e-84
ENSG00000155307	SAMSN1	541.143	-8.44596	0.429236	-19.6767	3.41428e-86	5.15002e-84
ENSG00000108679	LGALS3BP	16867.5	5.8212	0.29675	19.6165	1.11765e-85	1.66836e-83
ENSG00000137393	RNF144B	1204.2	-4.69042	0.239397	-19.5927	1.78566e-85	2.65179e-83
ENSG00000154016	GRAP	666.035	-7.25921	0.370786	-19.5779	2.38523e-85	3.52402e-83
ENSG00000164114	MAP9	845.027	4.69659	0.240227	19.5507	4.07271e-85	5.98647e-83
ENSG00000162511	LAPTM5	1133.07	-8.6049	0.440235	-19.5462	4.44667e-85	6.50298e-83
ENSG00000148700	ADD3	8190.88	3.04914	0.156763	19.4506	2.88189e-84	4.15137e-82
ENSG00000153208	MERTK	1665.4	-6.27901	0.322881	-19.4468	3.10083e-84	4.44452e-82
ENSG00000129657	SEC14L1	24580.1	-2.62395	0.13495	-19.4439	3.28131e-84	4.67992e-82
ENSG00000105419	MEIS3	899.029	7.34555	0.378998	19.3815	1.10573e-83	1.55396e-81
ENSG00000113361	CDH6	9307.65	7.93857	0.409653	19.3787	1.16663e-83	1.63158e-81
ENSG00000166923	GREM1	7355.43	8.01426	0.414135	19.3518	1.96775e-83	2.72552e-81
ENSG00000125089	SH3TC1	4481.74	-4.71551	0.243686	-19.3508	2.0089e-83	2.7692e-81
ENSG00000162174	ASRGL1	1068.93	-5.71814	0.295953	-19.3211	3.56766e-83	4.89449e-81
ENSG00000082458	DLG3	833.978	2.74934	0.142378	19.3102	4.40813e-83	6.01887e-81
ENSG00000112715	VEGFA	21232.2	4.2542	0.220554	19.2887	6.68495e-83	9.08459e-81
ENSG00000120337	TNFSF18	2764.85	-6.84349	0.356632	-19.1892	4.55493e-82	6.07534e-80
ENSG00000107249	GLIS3	2627.66	3.60361	0.188055	19.1625	7.61445e-82	1.0017e-79
ENSG00000165124	SVEP1	9008.78	7.33252	0.382833	19.1533	9.08313e-82	1.18948e-79
ENSG00000188559	RALGAPA2	3366.63	-2.49205	0.130399	-19.111	2.04436e-81	2.66506e-79
ENSG00000109339	MAPK10	236.86	6.93706	0.364251	19.0447	7.26788e-81	9.34767e-79
ENSG00000135502	SLC26A10	442.754	4.88098	0.257071	18.9869	2.19035e-80	2.80462e-78
ENSG00000175471	MCTP1	5524.47	-7.40898	0.390544	-18.9709	2.96763e-80	3.7664e-78
ENSG00000066735	KIF26A	395.892	-8.7979	0.464182	-18.9535	4.12825e-80	5.21644e-78
ENSG00000114541	FRMD4B	4466.25	-5.10252	0.269495	-18.9336	6.02636e-80	7.58164e-78
ENSG00000163638	ADAMTS9	3620.38	-4.76245	0.252267	-18.8786	1.71149e-79	2.14383e-77
ENSG00000128815	WDFY4	497.43	-9.19571	0.48815	-18.8379	3.69467e-79	4.60794e-77
ENSG00000110660	SLC35F2	6314.1	-2.2982	0.122022	-18.8343	3.95441e-79	4.88955e-77
ENSG00000109906	ZBTB16	213.315	-10.2662	0.545487	-18.8203	5.14913e-79	6.33959e-77
ENSG00000166016	ABTB2	822.312	4.97478	0.264599	18.8012	7.37857e-79	9.04582e-77
ENSG00000159167	STC1	3808.56	5.53338	0.295048	18.7541	1.79064e-78	2.15851e-76
ENSG00000120278	PLEKHG1	470.323	-4.02055	0.214419	-18.7509	1.90332e-78	2.28478e-76
ENSG00000213185	FAM24B	486.501	-2.58362	0.137849	-18.7425	2.23042e-78	2.66632e-76
ENSG00000138080	EMILIN1	5226.55	6.11804	0.32667	18.7285	2.89998e-78	3.45241e-76
ENSG00000135454	B4GALNT1	984.222	5.60099	0.299415	18.7065	4.38439e-78	5.13473e-76
ENSG00000154545	MAGED4	5278.91	2.87918	0.154028	18.6926	5.6857e-78	6.63178e-76
ENSG00000165495	PKNOX2	827.179	8.93213	0.477997	18.6866	6.36459e-78	7.36401e-76
ENSG00000197380	DACT3	782.277	3.88105	0.207834	18.6738	8.08765e-78	9.3202e-76
ENSG00000205336	ADGRG1	8272.52	-5.03221	0.269866	-18.6471	1.33279e-77	1.52979e-75
ENSG00000166444	ST5	1937.39	3.05939	0.164107	18.6427	1.44802e-77	1.65546e-75
ENSG00000160469	BRSK1	482.618	5.14375	0.275975	18.6385	1.56622e-77	1.78351e-75
ENSG00000095752	IL11	233.035	6.93908	0.37281	18.6129	2.52575e-77	2.8536e-75
ENSG00000160447	PKN3	794.792	-3.87764	0.208384	-18.6081	2.75985e-77	3.10591e-75
ENSG00000213203	GIMAP1	101.303	-9.18421	0.493781	-18.5998	3.22778e-77	3.61837e-75
ENSG00000172578	KLHL6	937.937	-8.10328	0.436377	-18.5695	5.67638e-77	6.33863e-75
ENSG00000187243	MAGED4B	5519.82	2.8837	0.155559	18.5377	1.02552e-76	1.13636e-74
ENSG00000157613	CREB3L1	7873.39	5.54214	0.299392	18.5113	1.67263e-76	1.83226e-74
ENSG00000165716	FAM69B	4175.7	-4.01961	0.217366	-18.4924	2.37858e-76	2.59571e-74
ENSG00000106034	CPED1	1305.82	5.91043	0.319678	18.4887	2.54577e-76	2.76769e-74
ENSG00000196411	EPHB4	13021.3	-2.2395	0.121244	-18.471	3.53635e-76	3.81581e-74
ENSG00000189067	LITAF	2933.13	4.75819	0.258052	18.4389	6.4005e-76	6.88054e-74
ENSG00000182379	NXPH4	775.525	6.54025	0.354768	18.4353	6.84465e-76	7.33065e-74
ENSG00000179954	SSC5D	354.28	4.24066	0.230581	18.3912	1.54579e-75	1.64942e-73
ENSG00000064989	CALCRL	2482.43	-4.53927	0.246912	-18.3842	1.75862e-75	1.86271e-73
ENSG00000221365	MIR1228	195.859	7.53768	0.410008	18.3842	1.75672e-75	1.86271e-73
ENSG00000102048	ASB9	292.761	-5.71215	0.310791	-18.3794	1.92213e-75	2.02845e-73
ENSG00000054356	PTPRN	139.969	7.44291	0.405566	18.3519	3.18552e-75	3.34945e-73
ENSG00000149131	SERPING1	3644.9	7.97198	0.434481	18.3483	3.40537e-75	3.55466e-73
ENSG00000171388	APLN	27545.2	-5.32778	0.290822	-18.3197	5.75976e-75	5.96902e-73
ENSG00000130193	THEM6	699.069	-2.12053	0.115792	-18.3132	6.49347e-75	6.70526e-73
ENSG00000165029	ABCA1	896.555	3.39293	0.185985	18.243	2.35367e-74	2.40459e-72
ENSG00000123146	ADGRE5	1672.58	3.69753	0.203283	18.1891	6.2937e-74	6.38456e-72
ENSG00000078596	ITM2A	2376.24	-7.82089	0.430172	-18.1808	7.32062e-74	7.40025e-72
ENSG00000101104	PABPC1L	1309.9	2.26318	0.124769	18.139	1.56919e-73	1.58071e-71
ENSG00000122884	P4HA1	28907.2	3.20801	0.177002	18.1241	2.05518e-73	2.05589e-71
ENSG00000167644	C19orf33	303.787	-6.24293	0.34523	-18.0834	4.30684e-73	4.27863e-71
ENSG00000224101	ELMO1-AS1	82.7701	-7.50628	0.415119	-18.0822	4.40008e-73	4.35623e-71
ENSG00000135111	TBX3	977.542	4.11516	0.227944	18.0534	7.42143e-73	7.29732e-71
ENSG00000164649	CDCA7L	6119.13	-2.33732	0.129631	-18.0305	1.12274e-72	1.09648e-70
ENSG00000137868	STRA6	145.142	7.79934	0.432978	18.0132	1.53367e-72	1.49273e-70
ENSG00000126878	AIF1L	3191.33	-7.45155	0.414721	-17.9676	3.49299e-72	3.37695e-70
ENSG00000172403	SYNPO2	1371.35	5.97373	0.332627	17.9592	4.06507e-72	3.90382e-70
ENSG00000198756	COLGALT2	315.623	6.42965	0.358304	17.9447	5.28042e-72	5.05412e-70
ENSG00000196782	MAML3	697.24	-2.55332	0.142376	-17.9336	6.45018e-72	6.1533e-70
ENSG00000164035	EMCN	1668.14	-6.19088	0.345671	-17.9097	9.89872e-72	9.38099e-70
ENSG00000166482	MFAP4	1529.72	6.24841	0.34895	17.9063	1.05232e-71	9.94013e-70
ENSG00000163239	TDRD10	92.0138	-9.18627	0.513519	-17.8888	1.44061e-71	1.35192e-69
ENSG00000186994	KANK3	425.393	-5.46423	0.305703	-17.8743	1.87091e-71	1.74437e-69
ENSG00000196358	NTNG2	149.269	4.66058	0.260907	17.863	2.29051e-71	2.12185e-69
ENSG00000136153	LMO7	25879.6	4.07673	0.228653	17.8293	4.1863e-71	3.85327e-69
ENSG00000134250	NOTCH2	6426.64	2.1255	0.119254	17.8233	4.66271e-71	4.27811e-69
ENSG00000127507	ADGRE2	123.619	3.79978	0.213202	17.8225	4.7303e-71	4.32635e-69
ENSG00000069431	ABCC9	296.982	9.05512	0.508326	17.8136	5.54424e-71	5.03878e-69
ENSG00000226363	HAGLROS	84.5214	-9.15397	0.514234	-17.8012	6.92043e-71	6.26974e-69
ENSG00000079931	MOXD1	1353.29	7.08341	0.398231	17.7872	8.88509e-71	8.02443e-69
ENSG00000080493	SLC4A4	472.901	8.44193	0.47613	17.7303	2.44693e-70	2.19614e-68
ENSG00000082014	SMARCD3	2007	2.42754	0.136942	17.7268	2.60607e-70	2.3317e-68
ENSG00000186469	GNG2	543.944	6.4161	0.362101	17.7191	2.98744e-70	2.66465e-68
ENSG00000169031	COL4A3	133.558	8.88565	0.503398	17.6513	9.93581e-70	8.80771e-68
ENSG00000110628	SLC22A18	340.859	3.65223	0.206949	17.648	1.05482e-69	9.32189e-68
ENSG00000171435	KSR2	73.727	-8.80909	0.500345	-17.606	2.21367e-69	1.94438e-67
ENSG00000187134	AKR1C1	4661.91	4.79463	0.272689	17.5828	3.33821e-69	2.92322e-67
ENSG00000167984	NLRC3	251.096	-2.47659	0.141008	-17.5634	4.69448e-69	4.09842e-67
ENSG00000121039	RDH10	2005.33	2.99654	0.170675	17.557	5.25814e-69	4.57664e-67
ENSG00000154096	THY1	7668.19	7.5365	0.429899	17.5308	8.33237e-69	7.20888e-67
ENSG00000099284	H2AFY2	283.189	6.2808	0.358463	17.5215	9.82253e-69	8.47267e-67
ENSG00000087842	PIR	4553.39	-3.09785	0.176865	-17.5153	1.09539e-68	9.42032e-67
ENSG00000149633	KIAA1755	719.068	5.22998	0.298817	17.5022	1.37725e-68	1.1774e-66
ENSG00000115318	LOXL3	6814.26	3.84682	0.219864	17.4964	1.52659e-68	1.30121e-66
ENSG00000005249	PRKAR2B	826.423	-7.19672	0.41153	-17.4877	1.77813e-68	1.51115e-66
ENSG00000096060	FKBP5	3105.52	-2.71537	0.155571	-17.4542	3.19686e-68	2.70887e-66
ENSG00000155269	GPR78	294.027	8.64136	0.495207	17.45	3.44374e-68	2.90951e-66
ENSG00000133056	PIK3C2B	1976.43	-3.76597	0.215985	-17.4363	4.37656e-68	3.6868e-66
ENSG00000159314	ARHGAP27	1053.96	-2.96807	0.170296	-17.4289	4.97808e-68	4.1813e-66
ENSG00000141469	SLC14A1	1423.3	10.6967	0.613867	17.4251	5.31996e-68	4.44255e-66
ENSG00000105851	PIK3CG	84.2673	-8.91802	0.513591	-17.364	1.54471e-67	1.27883e-65
ENSG00000166265	CYYR1	710.866	-9.89953	0.572615	-17.2883	5.76398e-67	4.73106e-65
ENSG00000226702	MIR217HG	268.384	-8.06201	0.466421	-17.2848	6.12166e-67	4.99617e-65
ENSG00000165424	ZCCHC24	475.474	2.15734	0.124832	17.2819	6.43948e-67	5.23879e-65
ENSG00000109625	CPZ	319.402	8.48904	0.491677	17.2655	8.56005e-67	6.90798e-65
ENSG00000104903	LYL1	1152	-4.76029	0.275797	-17.2601	9.38705e-67	7.55422e-65
ENSG00000135919	SERPINE2	103679	5.33415	0.309702	17.2235	1.76919e-66	1.41192e-64
ENSG00000139329	LUM	3849.47	8.49478	0.494019	17.1952	2.88299e-66	2.29445e-64
ENSG00000151067	CACNA1C	366.136	7.14782	0.416492	17.162	5.11618e-66	4.02724e-64
ENSG00000047617	ANO2	293.409	-7.79315	0.454129	-17.1606	5.23299e-66	4.10796e-64
ENSG00000143797	MBOAT2	2441.19	3.67308	0.214199	17.148	6.50972e-66	5.08252e-64
ENSG00000156345	CDK20	266.953	3.75719	0.219156	17.1439	6.98457e-66	5.43852e-64
ENSG00000089472	HEPH	3551.58	7.41625	0.433323	17.1148	1.1503e-65	8.90861e-64
ENSG00000183873	SCN5A	667.909	-5.74829	0.335891	-17.1135	1.17637e-65	9.08615e-64
ENSG00000181458	TMEM45A	4231.22	4.39313	0.257182	17.0818	2.02824e-65	1.5624e-63
ENSG00000171227	TMEM37	176.128	-5.58933	0.327366	-17.0736	2.3317e-65	1.79137e-63
ENSG00000197147	LRRC8B	171.206	-4.30729	0.252775	-17.0401	4.14321e-65	3.17462e-63
ENSG00000140465	CYP1A1	823.598	-4.58642	0.269503	-17.0181	6.03164e-65	4.59713e-63
ENSG00000121904	CSMD2	232.61	6.16627	0.362514	17.0098	6.9512e-65	5.28401e-63
ENSG00000157554	ERG	13355.5	-6.76041	0.39747	-17.0086	7.09066e-65	5.37584e-63
ENSG00000101445	PPP1R16B	121.635	-8.00765	0.471796	-16.9727	1.30759e-64	9.86168e-63
ENSG00000140285	FGF7	3365.74	10.3128	0.60838	16.9512	1.88627e-64	1.41519e-62
ENSG00000197568	HHLA3	432.438	2.60875	0.154145	16.9241	2.99061e-64	2.23791e-62
ENSG00000136111	TBC1D4	6853.31	-2.32827	0.137587	-16.9221	3.09318e-64	2.30867e-62
ENSG00000183828	NUDT14	1028.53	-2.4496	0.144916	-16.9036	4.23457e-64	3.1362e-62
ENSG00000184497	TMEM255B	629.294	-4.62154	0.275094	-16.7998	2.44685e-63	1.78465e-61
ENSG00000065717	TLE2	745.824	-3.53019	0.210135	-16.7996	2.45582e-63	1.78667e-61
ENSG00000149269	PAK1	1651.03	3.2999	0.196886	16.7605	4.74872e-63	3.42884e-61
ENSG00000196511	TPK1	816.224	-2.26899	0.135731	-16.7168	9.89067e-63	7.10599e-61
ENSG00000125538	IL1B	22502.3	8.73695	0.523291	16.6962	1.39745e-62	9.99018e-61
ENSG00000005243	COPZ2	2126.7	2.67149	0.16003	16.6937	1.45603e-62	1.03832e-60
ENSG00000117394	SLC2A1	3800.49	2.28636	0.137057	16.6818	1.77638e-62	1.26053e-60
ENSG00000106483	SFRP4	6532.27	9.55718	0.574746	16.6285	4.33174e-62	3.05128e-60
ENSG00000077942	FBLN1	3610.34	7.89526	0.476018	16.586	8.79207e-62	6.16301e-60
ENSG00000011465	DCN	18350.5	7.92449	0.478845	16.5492	1.6232e-61	1.13231e-59
ENSG00000162105	SHANK2	149.675	6.35472	0.384008	16.5484	1.64431e-61	1.14427e-59
ENSG00000167874	TMEM88	362.524	-4.1716	0.252392	-16.5283	2.29654e-61	1.58285e-59
ENSG00000145623	OSMR	2464.17	2.37725	0.143879	16.5226	2.52383e-61	1.73536e-59
ENSG00000163629	PTPN13	566.52	4.13772	0.250474	16.5195	2.655e-61	1.8212e-59
ENSG00000121858	TNFSF10	339.023	-5.47418	0.331515	-16.5126	2.97642e-61	2.03683e-59
ENSG00000129946	SHC2	265.212	-4.36466	0.264528	-16.4998	3.68039e-61	2.50667e-59
ENSG00000185633	NDUFA4L2	1372.63	6.95274	0.421598	16.4914	4.2318e-61	2.87543e-59
ENSG00000148400	NOTCH1	585.817	-2.47185	0.149947	-16.4849	4.71191e-61	3.19412e-59
ENSG00000165626	BEND7	1574.06	-2.56263	0.155587	-16.4707	5.95945e-61	4.02088e-59
ENSG00000163520	FBLN2	22646.9	7.58958	0.460919	16.4662	6.41732e-61	4.3197e-59
ENSG00000130755	GMFG	283.859	-5.77083	0.351515	-16.4171	1.44413e-60	9.65325e-59
ENSG00000129009	ISLR	1690.57	9.69829	0.590945	16.4115	1.58229e-60	1.05523e-58
ENSG00000015133	CCDC88C	1528.23	-2.05706	0.125423	-16.401	1.8823e-60	1.2524e-58
ENSG00000198929	NOS1AP	215.974	-5.23475	0.31923	-16.398	1.97509e-60	1.31111e-58
ENSG00000155816	FMN2	481.26	6.74334	0.412283	16.3561	3.93635e-60	2.60704e-58
ENSG00000215458	AATBC	71.9039	-3.15631	0.193373	-16.3223	6.84575e-60	4.50288e-58
ENSG00000155893	PXYLP1	658.809	2.64438	0.162045	16.3188	7.25386e-60	4.76045e-58
ENSG00000129538	RNASE1	3606.97	-7.92085	0.485717	-16.3075	8.72489e-60	5.71282e-58
ENSG00000120913	PDLIM2	3508.22	2.0075	0.123339	16.2763	1.45433e-59	9.50097e-58
ENSG00000109107	ALDOC	2099.13	2.56512	0.157849	16.2505	2.21691e-59	1.44174e-57
ENSG00000183018	SPNS2	1154.37	-4.77542	0.294335	-16.2244	3.38775e-59	2.19822e-57
ENSG00000019186	CYP24A1	90.1373	8.77437	0.5415	16.2038	4.73776e-59	3.06043e-57
ENSG00000146147	MLIP	251.858	-9.46033	0.583941	-16.2008	4.97554e-59	3.19967e-57
ENSG00000148680	HTR7	204.005	3.85422	0.238121	16.1859	6.33663e-59	4.05685e-57
ENSG00000083857	FAT1	5514.63	5.49817	0.339835	16.179	7.09912e-59	4.52491e-57
ENSG00000151778	SERP2	100.096	3.26888	0.202104	16.1743	7.66217e-59	4.873e-57
ENSG00000013016	EHD3	2932.06	3.58696	0.222088	16.1511	1.1156e-58	7.07937e-57
ENSG00000130158	DOCK6	6916.67	-2.04706	0.126759	-16.1493	1.14905e-58	7.27563e-57
ENSG00000184058	TBX1	645.265	-8.99247	0.55812	-16.1121	2.09887e-58	1.32027e-56
ENSG00000165209	STRBP	842.581	-2.06352	0.12814	-16.1036	2.40534e-58	1.50976e-56
ENSG00000116774	OLFML3	2572.16	4.57341	0.284354	16.0835	3.3304e-58	2.08132e-56
ENSG00000105650	PDE4C	142.523	5.08317	0.316104	16.0807	3.48503e-58	2.16932e-56
ENSG00000121281	ADCY7	1718.78	3.00628	0.186953	16.0804	3.50187e-58	2.17433e-56
ENSG00000104213	PDGFRL	949.795	-4.50575	0.280312	-16.074	3.88018e-58	2.39888e-56
ENSG00000137877	SPTBN5	241.656	-4.93233	0.306888	-16.0721	4.00483e-58	2.47065e-56
ENSG00000224189	HAGLR	1081.73	-8.90302	0.554082	-16.068	4.27342e-58	2.63071e-56
ENSG00000179044	EXOC3L1	119.844	-2.89082	0.180204	-16.0419	6.50865e-58	3.98966e-56
ENSG00000119950	MXI1	2621.57	2.53048	0.157765	16.0396	6.75882e-58	4.13422e-56
ENSG00000169891	REPS2	74.9691	-4.23302	0.264071	-16.0299	7.90299e-58	4.82384e-56
ENSG00000122870	BICC1	2208.46	6.50827	0.406048	16.0283	8.10259e-58	4.93521e-56
ENSG00000139187	KLRG1	331.893	-4.75682	0.297029	-16.0146	1.01002e-57	6.12603e-56
ENSG00000113083	LOX	44077.5	3.938	0.246209	15.9945	1.39521e-57	8.42684e-56
ENSG00000154188	ANGPT1	1509.75	5.78341	0.361714	15.9889	1.52686e-57	9.20267e-56
ENSG00000173269	MMRN2	4635.81	-4.71126	0.294715	-15.9858	1.60486e-57	9.65262e-56
ENSG00000105499	PLA2G4C	2682.55	-3.9818	0.249213	-15.9775	1.83364e-57	1.09828e-55
ENSG00000171067	C11orf24	3838.9	2.19522	0.137409	15.9758	1.88439e-57	1.12633e-55
ENSG00000095713	CRTAC1	121.723	-8.35913	0.523962	-15.9537	2.68497e-57	1.58838e-55
ENSG00000149571	KIRREL3	343.86	5.60869	0.351741	15.9455	3.06238e-57	1.80793e-55
ENSG00000071967	CYBRD1	2451.9	2.08411	0.130732	15.9418	3.24764e-57	1.91338e-55
ENSG00000149212	SESN3	476.701	4.23368	0.265875	15.9236	4.34975e-57	2.54191e-55
ENSG00000109511	ANXA10	840.031	8.25847	0.519452	15.8984	6.49699e-57	3.77376e-55
ENSG00000006453	BAIAP2L1	299.601	2.81247	0.176963	15.8929	7.0939e-57	4.11218e-55
ENSG00000172889	EGFL7	7062.85	-3.26802	0.205882	-15.8733	9.70742e-57	5.60462e-55
ENSG00000005108	THSD7A	529.322	-5.2826	0.332926	-15.8672	1.0697e-56	6.1636e-55
ENSG00000072682	P4HA2	12310.9	2.57663	0.162475	15.8586	1.22656e-56	7.05334e-55
ENSG00000185532	PRKG1	3483.2	5.19823	0.327954	15.8505	1.39501e-56	8.00605e-55
ENSG00000007129	CEACAM21	74.1004	-8.05063	0.509167	-15.8114	2.59722e-56	1.48759e-54
ENSG00000162496	DHRS3	3441.64	2.89249	0.183252	15.7842	3.9948e-56	2.28353e-54
ENSG00000214575	CPEB1	144.722	7.27346	0.461387	15.7643	5.47362e-56	3.10423e-54
ENSG00000162878	PKDCC	1630.82	4.18342	0.265713	15.7442	7.53154e-56	4.25458e-54
ENSG00000135828	RNASEL	462.449	2.0583	0.130766	15.7403	8.00065e-56	4.51074e-54
ENSG00000006534	ALDH3B1	753.383	4.80215	0.30531	15.7288	9.60594e-56	5.40522e-54
ENSG00000141505	ASGR1	165.817	-2.98249	0.18988	-15.7073	1.34853e-55	7.57331e-54
ENSG00000137225	CAPN11	62.9043	-5.35188	0.340783	-15.7046	1.40589e-55	7.88012e-54
ENSG00000112319	EYA4	154.001	7.48286	0.477581	15.6683	2.49313e-55	1.3893e-53
ENSG00000164761	TNFRSF11B	5221.39	8.25109	0.526793	15.6629	2.71307e-55	1.50604e-53
ENSG00000091428	RAPGEF4	346.961	-3.59214	0.229499	-15.6521	3.21512e-55	1.77788e-53
ENSG00000180884	ZNF792	688.958	-2.29253	0.146564	-15.6419	3.77539e-55	2.07971e-53
ENSG00000128606	LRRC17	4129.69	4.12986	0.26419	15.6322	4.39668e-55	2.41733e-53
ENSG00000125730	C3	30053.3	8.19366	0.52486	15.6112	6.11233e-55	3.34784e-53
ENSG00000120820	GLT8D2	897.287	4.93835	0.316756	15.5904	8.46023e-55	4.59885e-53
ENSG00000124496	TRERF1	855.087	5.7226	0.36714	15.587	8.9283e-55	4.84415e-53
ENSG00000010818	HIVEP2	50.6438	3.26106	0.209518	15.5646	1.2661e-54	6.83079e-53
ENSG00000086062	B4GALT1	13262.3	2.47868	0.159531	15.5373	1.94051e-54	1.04302e-52
ENSG00000188760	TMEM198	52.1941	7.92537	0.510862	15.5137	2.80142e-54	1.49738e-52
ENSG00000169184	MN1	654.958	3.35796	0.216642	15.5	3.46917e-54	1.84744e-52
ENSG00000158352	SHROOM4	6279.68	-3.39196	0.218846	-15.4993	3.50831e-54	1.86484e-52
ENSG00000184005	ST6GALNAC3	639.066	-5.30776	0.342892	-15.4794	4.77801e-54	2.53041e-52
ENSG00000175264	CHST1	377.818	-6.38967	0.413199	-15.4639	6.07978e-54	3.21392e-52
ENSG00000181652	ATG9B	1196.33	-3.97313	0.257198	-15.4477	7.81267e-54	4.11486e-52
ENSG00000156313	RPGR	1728.89	-2.06158	0.133458	-15.4474	7.85383e-54	4.129e-52
ENSG00000102385	DRP2	953.773	4.10424	0.265711	15.4463	7.99222e-54	4.1941e-52
ENSG00000165959	CLMN	605.82	-3.17087	0.205473	-15.4321	9.96175e-54	5.21815e-52
ENSG00000137486	ARRB1	2974.91	-3.61119	0.234183	-15.4204	1.19392e-53	6.22003e-52
ENSG00000004776	HSPB6	2031.94	5.82839	0.378195	15.4111	1.37873e-53	7.16991e-52
ENSG00000128917	DLL4	289.508	-8.12758	0.527502	-15.4077	1.45321e-53	7.54361e-52
ENSG00000166250	CLMP	3245.94	4.36177	0.28322	15.4007	1.62023e-53	8.39547e-52
ENSG00000114923	SLC4A3	489.676	4.66079	0.303184	15.3728	2.49125e-53	1.27937e-51
ENSG00000106025	TSPAN12	480.372	-3.93611	0.256267	-15.3594	3.06247e-53	1.56992e-51
ENSG00000105894	PTN	476.082	5.25675	0.342611	15.3432	3.93129e-53	2.01173e-51
ENSG00000106560	GIMAP2	103.93	-7.67821	0.501463	-15.3116	6.3966e-53	3.25594e-51
ENSG00000078098	FAP	13278.4	4.45104	0.290912	15.3003	7.60657e-53	3.865e-51
ENSG00000198208	RPS6KL1	563.91	-3.32483	0.217538	-15.2839	9.78836e-53	4.95611e-51
ENSG00000148848	ADAM12	1269.22	6.03584	0.395052	15.2786	1.06221e-52	5.36884e-51
ENSG00000177106	EPS8L2	1770.74	3.36219	0.220086	15.2767	1.09332e-52	5.51637e-51
ENSG00000134569	LRP4	525.522	2.94512	0.192823	15.2737	1.14555e-52	5.76981e-51
ENSG00000113739	STC2	13374.8	3.74696	0.245372	15.2706	1.20147e-52	6.04087e-51
ENSG00000198796	ALPK2	2027.12	8.50794	0.557192	15.2693	1.22457e-52	6.14631e-51
ENSG00000124785	NRN1	792.326	-9.83942	0.644962	-15.2558	1.50616e-52	7.53339e-51
ENSG00000157510	AFAP1L1	5447.62	-3.15312	0.206708	-15.2539	1.54986e-52	7.73857e-51
ENSG00000139269	INHBE	126.429	7.66541	0.502639	15.2503	1.63759e-52	8.16244e-51
ENSG00000054219	LY75	594.438	-5.30589	0.347989	-15.2473	1.71584e-52	8.53771e-51
ENSG00000113555	PCDH12	188.897	-4.04396	0.265567	-15.2277	2.31684e-52	1.14491e-50
ENSG00000149256	TENM4	252.459	7.06721	0.464157	15.2259	2.38083e-52	1.17452e-50
ENSG00000111674	ENO2	5469.04	2.66547	0.175164	15.217	2.72724e-52	1.34311e-50
ENSG00000125675	GRIA3	343.471	6.60751	0.434776	15.1975	3.67298e-52	1.8027e-50
ENSG00000169855	ROBO1	9718.35	2.73824	0.180228	15.1932	3.92503e-52	1.92313e-50
ENSG00000224057	EGFR-AS1	196.287	3.38033	0.222546	15.1894	4.15925e-52	2.02755e-50
ENSG00000154025	SLC5A10	1440.21	-2.8761	0.189763	-15.1563	6.88844e-52	3.3354e-50
ENSG00000198355	PIM3	439.163	-2.01028	0.132752	-15.1431	8.40949e-52	4.05825e-50
ENSG00000011028	MRC2	34154.4	2.67523	0.17671	15.1391	8.94106e-52	4.30756e-50
ENSG00000223953	C1QTNF5	2512.45	-2.96123	0.19581	-15.123	1.14264e-51	5.48659e-50
ENSG00000128512	DOCK4	8212.7	-3.0915	0.204489	-15.1182	1.22856e-51	5.88931e-50
ENSG00000121068	TBX2	747.544	5.81987	0.385003	15.1164	1.26189e-51	6.03903e-50
ENSG00000226314	ZNF192P1	66.5197	2.79302	0.184787	15.1148	1.29403e-51	6.1826e-50
ENSG00000188869	TMC3	320.811	7.92713	0.525233	15.0926	1.81146e-51	8.61189e-50
ENSG00000117595	IRF6	345.055	-5.26111	0.348739	-15.0861	1.99997e-51	9.47681e-50
ENSG00000188511	C22orf34	190.239	-8.04923	0.533601	-15.0847	2.04101e-51	9.65544e-50
ENSG00000132622	HSPA12B	615.889	-5.55724	0.368569	-15.0779	2.26385e-51	1.0692e-49
ENSG00000196872	KIAA1211L	110.117	-8.09597	0.537221	-15.0701	2.54821e-51	1.20154e-49
ENSG00000126882	FAM78A	296.684	-2.71107	0.180279	-15.0382	4.1231e-51	1.93149e-49
ENSG00000131459	GFPT2	4018.04	4.74386	0.315527	15.0347	4.35107e-51	2.03497e-49
ENSG00000153094	BCL2L11	145.473	-2.38578	0.158771	-15.0266	4.91858e-51	2.29667e-49
ENSG00000158106	RHPN1	343.385	-3.67622	0.245011	-15.0043	6.87981e-51	3.19689e-49
ENSG00000188517	COL25A1	442.853	-6.16995	0.411366	-14.9987	7.48956e-51	3.47463e-49
ENSG00000165801	ARHGEF40	3559.94	2.7974	0.186667	14.986	9.05996e-51	4.18297e-49
ENSG00000124875	CXCL6	20072.9	5.81314	0.388043	14.9807	9.82335e-51	4.52094e-49
ENSG00000162733	DDR2	2369.26	2.54222	0.169705	14.9802	9.88898e-51	4.54388e-49
ENSG00000206535	LNP1	178.331	2.24696	0.150168	14.963	1.28131e-50	5.86876e-49
ENSG00000138190	EXOC6	6125.55	-2.44319	0.163444	-14.9482	1.59912e-50	7.3012e-49
ENSG00000094755	GABRP	37.5981	-7.86759	0.526806	-14.9345	1.96535e-50	8.93088e-49
ENSG00000107957	SH3PXD2A	16504	2.99963	0.200851	14.9345	1.96406e-50	8.93088e-49
ENSG00000145826	LECT2	76.5689	8.52053	0.571277	14.9149	2.63757e-50	1.19479e-48
ENSG00000174059	CD34	7750.96	-4.94431	0.331836	-14.8999	3.3028e-50	1.49144e-48
ENSG00000166387	PPFIBP2	1006.55	3.36747	0.226098	14.8939	3.61329e-50	1.62909e-48
ENSG00000163710	PCOLCE2	2352.36	6.10108	0.409687	14.8921	3.711e-50	1.67053e-48
ENSG00000119630	PGF	6795.58	-3.62355	0.243511	-14.8804	4.41761e-50	1.97723e-48
ENSG00000119698	PPP4R4	74.6723	8.33201	0.559932	14.8804	4.41976e-50	1.97723e-48
ENSG00000105376	ICAM5	343.504	4.83891	0.325261	14.877	4.64934e-50	2.0767e-48
ENSG00000147113	CXorf36	1330.29	-10.0746	0.67732	-14.8742	4.84794e-50	2.16206e-48
ENSG00000104447	TRPS1	1338.98	5.05507	0.340006	14.8676	5.34981e-50	2.37486e-48
ENSG00000227660	UST-AS1	55.895	5.58624	0.37594	14.8594	6.04653e-50	2.68001e-48
ENSG00000179314	WSCD1	1287.39	-5.65297	0.380445	-14.8588	6.09842e-50	2.69886e-48
ENSG00000010278	CD9	38548.1	-2.69921	0.181667	-14.858	6.17244e-50	2.72742e-48
ENSG00000163536	SERPINI1	151.959	3.42097	0.230462	14.8439	7.61396e-50	3.3541e-48
ENSG00000172137	CALB2	54.9315	8.29183	0.559961	14.8079	1.30287e-49	5.7045e-48
ENSG00000142494	SLC47A1	482.854	-4.99776	0.337571	-14.8051	1.35828e-49	5.92014e-48
ENSG00000224687	RASAL2-AS1	195.242	2.21889	0.149873	14.8052	1.35681e-49	5.92014e-48
ENSG00000001617	SEMA3F	10863	-3.91136	0.264238	-14.8024	1.41394e-49	6.1534e-48
ENSG00000161940	BCL6B	1589.62	-7.0665	0.47785	-14.7881	1.74799e-49	7.56149e-48
ENSG00000100065	CARD10	2181.49	-3.01799	0.204312	-14.7714	2.23858e-49	9.6547e-48
ENSG00000148344	PTGES	1300.01	8.394	0.568792	14.7576	2.74934e-49	1.18222e-47
ENSG00000178860	MSC	849.268	7.60332	0.516106	14.7321	4.01128e-49	1.71462e-47
ENSG00000189367	KIAA0408	450.44	3.89939	0.265004	14.7145	5.20643e-49	2.21562e-47
ENSG00000204941	PSG5	687.653	6.44023	0.438329	14.6927	7.17966e-49	3.04633e-47
ENSG00000140450	ARRDC4	1219.66	2.84846	0.193889	14.6912	7.34035e-49	3.10993e-47
ENSG00000111424	VDR	609.204	3.6014	0.245217	14.6866	7.86057e-49	3.32057e-47
ENSG00000178401	DNAJC22	85.8603	3.03691	0.206916	14.677	9.04905e-49	3.81145e-47
ENSG00000141052	MYOCD	1594.43	9.95069	0.678095	14.6745	9.3953e-49	3.95151e-47
ENSG00000129038	LOXL1	8877.92	4.17436	0.28447	14.6742	9.43471e-49	3.9623e-47
ENSG00000138735	PDE5A	5945.33	2.98626	0.203573	14.6692	1.01497e-48	4.2502e-47
ENSG00000121552	CSTA	158.504	8.97708	0.612002	14.6684	1.02748e-48	4.29632e-47
ENSG00000182752	PAPPA	16240.5	7.52926	0.513355	14.6668	1.05214e-48	4.39308e-47
ENSG00000137960	GIPC2	165.054	-4.47532	0.305229	-14.6622	1.12632e-48	4.6892e-47
ENSG00000170743	SYT9	102.574	-6.84635	0.466995	-14.6604	1.1554e-48	4.80331e-47
ENSG00000179776	CDH5	51059.8	-4.99047	0.340508	-14.656	1.23412e-48	5.11582e-47
ENSG00000145681	HAPLN1	11946.8	8.78885	0.599702	14.6554	1.24482e-48	5.15277e-47
ENSG00000088340	FER1L4	1164.67	3.20881	0.219214	14.6378	1.61185e-48	6.66247e-47
ENSG00000216490	IFI30	530.933	3.45994	0.23653	14.6279	1.86381e-48	7.69288e-47
ENSG00000112139	MDGA1	536.889	3.51361	0.240388	14.6164	2.2071e-48	9.09677e-47
ENSG00000138685	FGF2	20287	2.89979	0.198459	14.6115	2.37264e-48	9.76512e-47
ENSG00000136275	C7orf69	77.2638	8.04687	0.550867	14.6076	2.5111e-48	1.03202e-46
ENSG00000149451	ADAM33	561.175	7.88392	0.540114	14.5968	2.9445e-48	1.20499e-46
ENSG00000166448	TMEM130	81.3601	7.36546	0.505772	14.5628	4.84336e-48	1.97365e-46
ENSG00000170909	OSCAR	280.725	5.51366	0.379532	14.5275	8.1089e-48	3.29038e-46
ENSG00000196329	GIMAP5	665.492	-6.59608	0.454458	-14.5142	9.8535e-48	3.98148e-46
ENSG00000219642	BMPR1APS1	409.448	4.22047	0.290849	14.5108	1.03447e-47	4.1741e-46
ENSG00000214338	SOGA3	233.06	3.18655	0.219669	14.5061	1.10813e-47	4.46506e-46
ENSG00000123096	SSPN	137.521	3.97465	0.274024	14.5047	1.1307e-47	4.54963e-46
ENSG00000168309	FAM107A	1675.18	-5.44718	0.37574	-14.4972	1.2621e-47	5.07128e-46
ENSG00000147697	GSDMC	93.6118	-5.77523	0.39925	-14.4652	2.00972e-47	8.03051e-46
ENSG00000105825	TFPI2	124386	6.70055	0.46329	14.463	2.07612e-47	8.28437e-46
ENSG00000114268	PFKFB4	646.512	3.11582	0.215984	14.4262	3.54158e-47	1.40929e-45
ENSG00000169047	IRS1	76.6706	6.19341	0.429353	14.425	3.60245e-47	1.43154e-45
ENSG00000108798	ABI3	671.557	-6.27104	0.434892	-14.4198	3.88636e-47	1.54223e-45
ENSG00000122420	PTGFR	388.131	3.26008	0.226208	14.4119	4.35802e-47	1.72465e-45
ENSG00000088836	SLC4A11	465.666	-2.60779	0.180971	-14.41	4.47954e-47	1.77031e-45
ENSG00000008441	NFIX	13514.5	2.53273	0.175806	14.4064	4.71324e-47	1.85757e-45
ENSG00000198075	SULT1C4	156.935	-7.34822	0.510239	-14.4015	5.06247e-47	1.99248e-45
ENSG00000127241	MASP1	1947.64	6.41237	0.445262	14.4014	5.07371e-47	1.99418e-45
ENSG00000149564	ESAM	11973.6	-6.14081	0.42728	-14.3718	7.77301e-47	3.05096e-45
ENSG00000110076	NRXN2	68.2484	6.04479	0.421021	14.3575	9.56641e-47	3.74977e-45
ENSG00000164684	ZNF704	88.5871	-4.81322	0.335596	-14.3423	1.19085e-46	4.63627e-45
ENSG00000185291	IL3RA	255.281	-5.11675	0.356959	-14.3343	1.3363e-46	5.19553e-45
ENSG00000072195	SPEG	2742.29	4.9346	0.344262	14.3339	1.34448e-46	5.2203e-45
ENSG00000049323	LTBP1	34699	3.49472	0.243842	14.3319	1.38187e-46	5.35823e-45
ENSG00000164920	OSR2	113.799	6.6038	0.461329	14.3147	1.77018e-46	6.84548e-45
ENSG00000166922	SCG5	832.345	3.89311	0.272159	14.3046	2.04933e-46	7.8932e-45
ENSG00000122641	INHBA	5916.49	4.56121	0.319096	14.2942	2.37871e-46	9.14964e-45
ENSG00000110876	SELPLG	419.873	3.42826	0.240135	14.2764	3.07066e-46	1.17641e-44
ENSG00000105696	TMEM59L	313.407	3.72279	0.26081	14.2739	3.18047e-46	1.21686e-44
ENSG00000188158	NHS	45.97	6.87931	0.4826	14.2547	4.19204e-46	1.59541e-44
ENSG00000111087	GLI1	76.1168	3.9975	0.280558	14.2484	4.5888e-46	1.74181e-44
ENSG00000141480	ARRB2	1187.55	-2.10175	0.147698	-14.23	5.96487e-46	2.25522e-44
ENSG00000175600	SUGCT	605.904	3.64653	0.256738	14.2033	8.73705e-46	3.29038e-44
ENSG00000136002	ARHGEF4	100.512	5.66848	0.399609	14.1851	1.1338e-45	4.25878e-44
ENSG00000161835	GRASP	1859.53	-3.10225	0.218954	-14.1685	1.4357e-45	5.38573e-44
ENSG00000041982	TNC	4942.63	6.62975	0.468132	14.1621	1.57163e-45	5.888e-44
ENSG00000178081	ULK4P3	92.2657	-2.62178	0.185128	-14.162	1.57404e-45	5.88937e-44
ENSG00000127928	GNGT1	5044.34	6.73217	0.475379	14.1617	1.5814e-45	5.90924e-44
ENSG00000164530	PI16	252.893	7.12369	0.503053	14.1609	1.59894e-45	5.96702e-44
ENSG00000171889	MIR31HG	436.542	2.08554	0.147806	14.1099	3.29943e-45	1.21711e-43
ENSG00000196154	S100A4	1152.07	5.18386	0.367457	14.1074	3.41994e-45	1.25835e-43
ENSG00000170458	CD14	464.031	6.2398	0.443014	14.0849	4.70329e-45	1.72394e-43
ENSG00000082482	KCNK2	402.755	9.96486	0.707598	14.0827	4.85521e-45	1.77736e-43
ENSG00000153714	LURAP1L	119.144	2.04233	0.145061	14.0791	5.10425e-45	1.8638e-43
ENSG00000105784	RUNDC3B	173.407	-4.52604	0.321817	-14.064	6.3214e-45	2.3024e-43
ENSG00000105339	DENND3	3434.84	-2.17833	0.155325	-14.0243	1.10645e-44	4.00462e-43
ENSG00000065621	GSTO2	80.4426	2.75648	0.196954	13.9956	1.6589e-44	5.9741e-43
ENSG00000118137	APOA1	562.354	8.13083	0.581003	13.9945	1.6845e-44	6.05116e-43
ENSG00000227028	SLC8A1-AS1	216.173	3.75221	0.268146	13.9931	1.71642e-44	6.15815e-43
ENSG00000139200	PIANP	42.6215	5.52162	0.395579	13.9583	2.79984e-44	9.99199e-43
ENSG00000170917	NUDT6	5686.71	2.65975	0.190758	13.9431	3.46726e-44	1.23019e-42
ENSG00000164949	GEM	127.632	4.66539	0.335309	13.9137	5.23016e-44	1.84885e-42
ENSG00000151304	SRFBP1	4937.4	3.04705	0.219331	13.8924	7.03994e-44	2.47342e-42
ENSG00000186340	THBS2	24583.3	7.6982	0.554386	13.886	7.70107e-44	2.69257e-42
ENSG00000110881	ASIC1	474.742	2.64845	0.190805	13.8804	8.3246e-44	2.90705e-42
ENSG00000221955	SLC12A8	675.321	3.46294	0.249592	13.8744	9.05164e-44	3.15712e-42
ENSG00000133401	PDZD2	302.897	-3.04753	0.219679	-13.8726	9.28011e-44	3.23289e-42
ENSG00000111305	GSG1	54.5695	6.53491	0.471853	13.8495	1.28152e-43	4.45363e-42
ENSG00000100739	BDKRB1	823.476	10.2481	0.739999	13.8488	1.29406e-43	4.49178e-42
ENSG00000060140	STYK1	248.854	-3.6528	0.263812	-13.8462	1.34102e-43	4.6436e-42
ENSG00000128641	MYO1B	15773.5	3.31704	0.239969	13.8228	1.85745e-43	6.42415e-42
ENSG00000081052	COL4A4	1892.46	7.81776	0.565792	13.8174	2.00203e-43	6.9159e-42
ENSG00000189320	FAM180A	135.613	8.12243	0.588088	13.8116	2.16999e-43	7.47817e-42
ENSG00000182667	NTM	2243.17	3.7863	0.274361	13.8004	2.53275e-43	8.71788e-42
ENSG00000147650	LRP12	8055.99	2.13622	0.155066	13.7762	3.54548e-43	1.21025e-41
ENSG00000183876	ARSI	102.978	4.76219	0.345688	13.7759	3.55675e-43	1.21266e-41
ENSG00000158186	MRAS	484.782	2.54388	0.184708	13.7725	3.73155e-43	1.26926e-41
ENSG00000165140	FBP1	61.475	-5.58295	0.405418	-13.7708	3.81818e-43	1.29566e-41
ENSG00000136542	GALNT5	362.729	7.94902	0.577321	13.7688	3.92656e-43	1.32931e-41
ENSG00000169116	PARM1	1356.82	6.70987	0.4875	13.7638	4.20632e-43	1.42068e-41
ENSG00000133657	ATP13A3	73739	2.34729	0.170572	13.7613	4.35531e-43	1.46928e-41
ENSG00000170323	FABP4	1297.05	-5.76535	0.419173	-13.7541	4.81168e-43	1.61755e-41
ENSG00000180921	FAM83H	339.73	3.75367	0.27304	13.7477	5.25646e-43	1.76502e-41
ENSG00000169604	ANTXR1	4742.17	3.3228	0.241758	13.7444	5.50546e-43	1.84648e-41
ENSG00000169432	SCN9A	1159.27	4.97807	0.362469	13.7338	6.37216e-43	2.12972e-41
ENSG00000181409	AATK	166.511	-3.56178	0.259688	-13.7156	8.19146e-43	2.73144e-41
ENSG00000182580	EPHB3	43.4823	7.54912	0.550515	13.7128	8.50792e-43	2.8304e-41
ENSG00000159208	CIART	364.288	2.563	0.187174	13.6931	1.11601e-42	3.68719e-41
ENSG00000101680	LAMA1	1437.44	7.40229	0.540776	13.6883	1.19304e-42	3.93717e-41
ENSG00000130707	ASS1	1678.28	3.93817	0.287774	13.6849	1.24943e-42	4.11853e-41
ENSG00000157654	PALM2-AKAP2	208.109	3.28984	0.240708	13.6673	1.59095e-42	5.20266e-41
ENSG00000145335	SNCA	2923.73	-6.88428	0.503733	-13.6665	1.60929e-42	5.25664e-41
ENSG00000143320	CRABP2	518.908	5.295	0.387699	13.6575	1.8217e-42	5.94375e-41
ENSG00000161958	FGF11	749.583	3.60165	0.264146	13.6351	2.47688e-42	8.04497e-41
ENSG00000129595	EPB41L4A	516.521	-5.44559	0.399527	-13.6301	2.65226e-42	8.6049e-41
ENSG00000197142	ACSL5	934.659	-3.2812	0.240861	-13.6228	2.9306e-42	9.49725e-41
ENSG00000079691	LRRC16A	513.63	3.13569	0.230391	13.6103	3.47818e-42	1.12591e-40
ENSG00000087303	NID2	17595.7	4.27632	0.314234	13.6087	3.55425e-42	1.14796e-40
ENSG00000106624	AEBP1	18719.4	3.46249	0.254488	13.6057	3.70339e-42	1.19479e-40
ENSG00000151388	ADAMTS12	10406.4	6.57981	0.483693	13.6033	3.82875e-42	1.23385e-40
ENSG00000109610	SOD3	106	8.1545	0.599838	13.5945	4.31721e-42	1.38816e-40
ENSG00000155792	DEPTOR	124.99	6.8537	0.504483	13.5856	4.87585e-42	1.56429e-40
ENSG00000135063	FAM189A2	350.478	-4.96408	0.36566	-13.5757	5.58315e-42	1.78723e-40
ENSG00000228288	PCAT6	186.459	2.59723	0.191451	13.566	6.36689e-42	2.03585e-40
ENSG00000132470	ITGB4	878.078	-5.6477	0.416567	-13.5577	7.13221e-42	2.27552e-40
ENSG00000176697	BDNF	6036.64	3.03496	0.224139	13.5405	9.01601e-42	2.86701e-40
ENSG00000146674	IGFBP3	87693.8	4.87721	0.360393	13.533	9.98097e-42	3.15991e-40
ENSG00000151623	NR3C2	1190.1	-4.30775	0.318867	-13.5096	1.37313e-41	4.33297e-40
ENSG00000175544	CABP4	26.5265	-7.23244	0.535949	-13.4946	1.68179e-41	5.28379e-40
ENSG00000140937	CDH11	40429.7	3.08287	0.228608	13.4854	1.90647e-41	5.97664e-40
ENSG00000095303	PTGS1	2273.65	4.63292	0.343676	13.4805	2.03827e-41	6.38288e-40
ENSG00000152128	TMEM163	367.573	-5.79595	0.430128	-13.4749	2.19645e-41	6.87077e-40
ENSG00000120594	PLXDC2	605.532	6.0544	0.449714	13.4628	2.58924e-41	8.07316e-40
ENSG00000102755	FLT1	1172.37	-5.09696	0.378655	-13.4607	2.66455e-41	8.29003e-40
ENSG00000157064	NMNAT2	245.014	4.78549	0.355734	13.4524	2.97943e-41	9.24973e-40
ENSG00000174348	PODN	544.463	5.34662	0.397679	13.4446	3.31293e-41	1.0274e-39
ENSG00000165868	HSPA12A	78.0715	6.1461	0.458413	13.4073	5.47785e-41	1.69331e-39
ENSG00000170417	TMEM182	232.577	2.15356	0.160838	13.3897	6.94876e-41	2.13654e-39
ENSG00000170891	CYTL1	6199.63	-7.31723	0.54706	-13.3756	8.40187e-41	2.57508e-39
ENSG00000180353	HCLS1	4896.15	-4.99813	0.373699	-13.3747	8.49431e-41	2.60065e-39
ENSG00000142920	AZIN2	232.578	2.832	0.211886	13.3657	9.5966e-41	2.92569e-39
ENSG00000132561	MATN2	1161.05	4.78749	0.358226	13.3644	9.75611e-41	2.97118e-39
ENSG00000010319	SEMA3G	289.318	-7.79825	0.584169	-13.3493	1.1957e-40	3.62611e-39
ENSG00000107779	BMPR1A	234.123	4.34328	0.325406	13.3472	1.22923e-40	3.72387e-39
ENSG00000213160	KLHL23	341.55	-2.04704	0.153399	-13.3445	1.27449e-40	3.85695e-39
ENSG00000121361	KCNJ8	83.0964	7.54861	0.566678	13.3208	1.75228e-40	5.28066e-39
ENSG00000118849	RARRES1	309.932	3.61544	0.271478	13.3176	1.82816e-40	5.50359e-39
ENSG00000129467	ADCY4	3211.4	-4.19636	0.315251	-13.3112	1.99282e-40	5.99304e-39
ENSG00000076706	MCAM	97455.8	-6.0412	0.453885	-13.31	2.02514e-40	6.08387e-39
ENSG00000204403	CASP12	37.5653	-6.35083	0.477597	-13.2975	2.39455e-40	7.17866e-39
ENSG00000172345	STARD5	686.157	3.16559	0.238415	13.2776	3.12222e-40	9.31172e-39
ENSG00000172935	MRGPRF	46.0285	7.87332	0.594027	13.2541	4.26981e-40	1.26818e-38
ENSG00000196104	SPOCK3	145.165	6.19251	0.467576	13.2438	4.89729e-40	1.45006e-38
ENSG00000124126	PREX1	9573.33	-2.43821	0.184253	-13.2329	5.66608e-40	1.67254e-38
ENSG00000124731	TREM1	46.4706	8.03073	0.606951	13.2313	5.79063e-40	1.70581e-38
ENSG00000142583	SLC2A5	114.004	7.08007	0.535469	13.2222	6.53354e-40	1.92073e-38
ENSG00000213088	ACKR1	64.5521	-7.159	0.541511	-13.2204	6.68859e-40	1.96431e-38
ENSG00000173641	HSPB7	1704.96	8.55832	0.647558	13.2163	7.06577e-40	2.07296e-38
ENSG00000116194	ANGPTL1	89.6288	7.32908	0.555116	13.2028	8.45409e-40	2.46521e-38
ENSG00000056998	GYG2	190.147	4.86687	0.368756	13.1981	8.99924e-40	2.62152e-38
ENSG00000167123	CERCAM	7004.53	2.37542	0.180133	13.187	1.04185e-39	3.02578e-38
ENSG00000137841	PLCB2	1591.02	-5.49349	0.417722	-13.1511	1.67767e-39	4.85764e-38
ENSG00000164692	COL1A2	410212	7.12599	0.5425	13.1355	2.06192e-39	5.95826e-38
ENSG00000153029	MR1	624.537	2.2196	0.16925	13.1143	2.72524e-39	7.84359e-38
ENSG00000167767	KRT80	1860.97	-3.3107	0.252474	-13.113	2.77304e-39	7.97319e-38
ENSG00000117525	F3	1681.75	5.25485	0.400911	13.1073	2.99099e-39	8.58271e-38
ENSG00000147852	VLDLR	885.989	3.41486	0.260756	13.096	3.47039e-39	9.93855e-38
ENSG00000075223	SEMA3C	12398.9	3.96176	0.302822	13.0828	4.12898e-39	1.18129e-37
ENSG00000102934	PLLP	63.3894	-6.73582	0.515026	-13.0786	4.36456e-39	1.24745e-37
ENSG00000203930	LINC00632	86.8342	2.22718	0.170476	13.0644	5.25715e-39	1.4981e-37
ENSG00000183671	GPR1	1332.51	7.29893	0.559361	13.0487	6.46351e-39	1.83824e-37
ENSG00000204161	C10orf128	83.3919	-7.39981	0.567097	-13.0486	6.4749e-39	1.83966e-37
ENSG00000104415	WISP1	136.999	6.866	0.526204	13.0482	6.50783e-39	1.8472e-37
ENSG00000101187	SLCO4A1	206.286	-4.59088	0.35237	-13.0286	8.41549e-39	2.37696e-37
ENSG00000173114	LRRN3	124.614	7.43686	0.571117	13.0216	9.2203e-39	2.59665e-37
ENSG00000196562	SULF2	12220.4	-3.29833	0.253362	-13.0183	9.63373e-39	2.70778e-37
ENSG00000185634	SHC4	146.678	4.31617	0.331592	13.0165	9.85967e-39	2.76859e-37
ENSG00000089041	P2RX7	156.897	-5.71372	0.439248	-13.0079	1.10267e-38	3.08726e-37
ENSG00000183023	SLC8A1	1413.56	3.50575	0.270286	12.9705	1.7979e-38	4.99495e-37
ENSG00000101425	BPI	22.2684	6.73685	0.519655	12.9641	1.9553e-38	5.41134e-37
ENSG00000200378	RNU5B-4P	24.5687	-5.24115	0.404953	-12.9426	2.58643e-38	7.12382e-37
ENSG00000122176	FMOD	436.462	4.73364	0.366276	12.9237	3.30895e-38	9.0705e-37
ENSG00000166165	CKB	368.107	3.11983	0.241434	12.9221	3.3789e-38	9.25342e-37
ENSG00000227507	LTB	124.138	-5.22499	0.404453	-12.9187	3.53266e-38	9.66534e-37
ENSG00000196793	ZNF239	143.138	2.9564	0.229198	12.8989	4.56728e-38	1.24488e-36
ENSG00000084764	MAPRE3	1484.22	2.19774	0.170399	12.8977	4.63937e-38	1.26333e-36
ENSG00000162643	WDR63	129.509	3.42216	0.265343	12.8971	4.67334e-38	1.27138e-36
ENSG00000125378	BMP4	6129.49	-4.71316	0.365659	-12.8895	5.15787e-38	1.39791e-36
ENSG00000170011	MYRIP	803.314	-3.61765	0.280669	-12.8894	5.16412e-38	1.39829e-36
ENSG00000105605	CACNG7	356.84	4.80841	0.373541	12.8725	6.42792e-38	1.73723e-36
ENSG00000172164	SNTB1	130.149	6.14787	0.477641	12.8713	6.52827e-38	1.76269e-36
ENSG00000171533	MAP6	176.609	3.74665	0.291348	12.8597	7.58998e-38	2.04362e-36
ENSG00000111799	COL12A1	21582.8	4.76392	0.371298	12.8305	1.10713e-37	2.95886e-36
ENSG00000111261	MANSC1	5183.02	-2.00114	0.156136	-12.8167	1.32288e-37	3.51588e-36
ENSG00000069812	HES2	352.423	-4.63819	0.36196	-12.8141	1.3672e-37	3.63032e-36
ENSG00000171522	PTGER4	1222.56	-3.23746	0.252654	-12.8138	1.3722e-37	3.64025e-36
ENSG00000099957	P2RX6	73.4581	4.29176	0.335132	12.8062	1.51371e-37	4.00827e-36
ENSG00000181885	CLDN7	374.052	-3.47814	0.271708	-12.801	1.61777e-37	4.26812e-36
ENSG00000222808	RNU4-47P	35.5873	-3.20841	0.25079	-12.7932	1.7895e-37	4.70828e-36
ENSG00000155324	GRAMD3	1891.01	3.57077	0.279333	12.7832	2.03476e-37	5.33406e-36
ENSG00000135424	ITGA7	1792.03	6.91226	0.541005	12.7767	2.21298e-37	5.796e-36
ENSG00000164483	SAMD3	68.2568	5.52115	0.432656	12.761	2.70538e-37	7.04721e-36
ENSG00000092929	UNC13D	315.152	-3.7362	0.293381	-12.735	3.77992e-37	9.82848e-36
ENSG00000171488	LRRC8C	310.31	-2.14159	0.168892	-12.6803	7.60447e-37	1.95089e-35
ENSG00000089225	TBX5	41.1448	7.41757	0.586199	12.6537	1.06749e-36	2.72403e-35
ENSG00000019991	HGF	1403.95	6.44526	0.509394	12.6528	1.0795e-36	2.75225e-35
ENSG00000180139	ACTA2-AS1	27293.3	5.26595	0.416374	12.6472	1.15989e-36	2.9546e-35
ENSG00000173706	HEG1	39714.2	2.29734	0.181747	12.6403	1.26498e-36	3.21375e-35
ENSG00000140538	NTRK3	50.6688	7.85596	0.621945	12.6313	1.41942e-36	3.60294e-35
ENSG00000173894	CBX2	42.0299	-2.91493	0.230832	-12.6279	1.4815e-36	3.75721e-35
ENSG00000152784	PRDM8	490.576	2.69174	0.213315	12.6186	1.66744e-36	4.21764e-35
ENSG00000167861	HID1	1019.49	-4.66814	0.370004	-12.6165	1.71365e-36	4.33072e-35
ENSG00000164106	SCRG1	323.184	7.31107	0.579667	12.6125	1.80135e-36	4.5404e-35
ENSG00000198795	ZNF521	4208.76	-4.86469	0.386111	-12.5992	2.13237e-36	5.3607e-35
ENSG00000134363	FST	5379.02	2.78048	0.220761	12.595	2.24974e-36	5.64099e-35
ENSG00000067445	TRO	1190.9	2.55975	0.203255	12.5938	2.2842e-36	5.72242e-35
ENSG00000153976	HS3ST3A1	92.7348	6.54804	0.520064	12.5908	2.3713e-36	5.93546e-35
ENSG00000123095	BHLHE41	406.139	4.85175	0.385358	12.5902	2.38927e-36	5.97525e-35
ENSG00000158555	GDPD5	2311.1	-2.09652	0.166627	-12.5821	2.64892e-36	6.60738e-35
ENSG00000137103	TMEM8B	428.174	2.29078	0.182554	12.5485	4.04987e-36	1.00324e-34
ENSG00000111816	FRK	56.6103	5.76382	0.459714	12.5378	4.63487e-36	1.1452e-34
ENSG00000049540	ELN	10264.6	7.39324	0.590193	12.5268	5.32637e-36	1.31381e-34
ENSG00000118640	VAMP8	764.594	-4.033	0.322019	-12.5241	5.51283e-36	1.35748e-34
ENSG00000183785	TUBA8	480.475	-3.4891	0.278692	-12.5196	5.83615e-36	1.43586e-34
ENSG00000111452	ADGRD1	647.646	6.50652	0.519847	12.5162	6.08557e-36	1.49595e-34
ENSG00000007908	SELE	759.679	-6.67632	0.533984	-12.5029	7.2016e-36	1.76542e-34
ENSG00000145934	TENM2	1146.45	8.02485	0.641844	12.5028	7.20631e-36	1.76542e-34
ENSG00000149970	CNKSR2	81.5405	8.41444	0.673207	12.499	7.557e-36	1.84976e-34
ENSG00000107562	CXCL12	1593.35	5.25777	0.420881	12.4923	8.22392e-36	2.00619e-34
ENSG00000159164	SV2A	632.026	3.27029	0.262046	12.4798	9.61958e-36	2.34269e-34
ENSG00000128052	KDR	8308.54	-3.77405	0.302676	-12.469	1.10243e-35	2.68026e-34
ENSG00000170425	ADORA2B	3605.75	2.83486	0.227466	12.4628	1.19098e-35	2.89309e-34
ENSG00000056291	NPFFR2	74.8338	-7.54597	0.60557	-12.4609	1.2194e-35	2.95963e-34
ENSG00000130751	NPAS1	114.293	3.86373	0.310353	12.4495	1.40769e-35	3.40803e-34
ENSG00000205710	C17orf107	65.2691	2.95053	0.237019	12.4485	1.42526e-35	3.44766e-34
ENSG00000105963	ADAP1	313.443	4.12835	0.331734	12.4448	1.49307e-35	3.60264e-34
ENSG00000116833	NR5A2	575.26	-6.63825	0.533739	-12.4373	1.64036e-35	3.95471e-34
ENSG00000225670	CADM3-AS1	2420.67	-6.34777	0.511018	-12.4218	1.98999e-35	4.79361e-34
ENSG00000112773	FAM46A	3078.77	2.5373	0.204274	12.4211	2.00805e-35	4.83309e-34
ENSG00000038295	TLL1	434.648	-5.18978	0.418419	-12.4033	2.50767e-35	6.02051e-34
ENSG00000132481	TRIM47	1670.84	-2.43559	0.196628	-12.3868	3.07962e-35	7.36298e-34
ENSG00000162706	CADM3	1856.61	-6.36036	0.513521	-12.3858	3.12031e-35	7.44789e-34
ENSG00000182264	IZUMO1	19.3748	-5.4606	0.441198	-12.3768	3.49194e-35	8.32803e-34
ENSG00000103196	CRISPLD2	279.386	4.29791	0.34768	12.3617	4.21257e-35	1.00053e-33
ENSG00000154639	CXADR	226.83	-4.94196	0.400065	-12.3529	4.69844e-35	1.11226e-33
ENSG00000213859	KCTD11	359.913	2.13359	0.172755	12.3504	4.84962e-35	1.14711e-33
ENSG00000066056	TIE1	20114.1	-4.83497	0.391685	-12.344	5.2457e-35	1.23977e-33
ENSG00000091972	CD200	11251.8	3.94059	0.319398	12.3375	5.68682e-35	1.34293e-33
ENSG00000120899	PTK2B	528.159	2.6578	0.215469	12.335	5.87202e-35	1.38553e-33
ENSG00000141524	TMC6	951.185	-4.87158	0.39507	-12.3309	6.17229e-35	1.454e-33
ENSG00000136244	IL6	18296.2	3.39049	0.275241	12.3182	7.2255e-35	1.69517e-33
ENSG00000185652	NTF3	267.664	9.54307	0.774885	12.3155	7.47782e-35	1.75294e-33
ENSG00000165923	AGBL2	34.5206	3.8397	0.311991	12.3071	8.29782e-35	1.94042e-33
ENSG00000147231	CXorf57	97.8065	4.1918	0.340979	12.2934	9.82495e-35	2.29196e-33
ENSG00000174611	KY	64.5076	7.20551	0.58646	12.2864	1.07113e-34	2.48866e-33
ENSG00000115594	IL1R1	24977.9	3.74967	0.305275	12.2829	1.11848e-34	2.59657e-33
ENSG00000106538	RARRES2	122.324	7.42561	0.604767	12.2785	1.1821e-34	2.73984e-33
ENSG00000170624	SGCD	59.9606	7.62276	0.620945	12.2761	1.21762e-34	2.81764e-33
ENSG00000171291	ZNF439	249.741	3.86029	0.314827	12.2616	1.45584e-34	3.3608e-33
ENSG00000145242	EPHA5	2170.08	6.17436	0.503736	12.2571	1.53857e-34	3.54893e-33
ENSG00000135842	FAM129A	3808.62	2.69172	0.219766	12.2481	1.72015e-34	3.95512e-33
ENSG00000197653	DNAH10	199.58	3.05888	0.249935	12.2387	1.93107e-34	4.42947e-33
ENSG00000187955	COL14A1	310.754	7.20404	0.588773	12.2357	2.0042e-34	4.59355e-33
ENSG00000105877	DNAH11	1969.73	-2.09222	0.171038	-12.2325	2.08474e-34	4.77436e-33
ENSG00000176046	NUPR1	2487.94	4.34009	0.355251	12.2169	2.5238e-34	5.77068e-33
ENSG00000115884	SDC1	1630.58	3.64316	0.298382	12.2097	2.75809e-34	6.29639e-33
ENSG00000140044	JDP2	369.357	3.07213	0.251635	12.2087	2.79478e-34	6.37006e-33
ENSG00000101134	DOK5	760.856	4.81373	0.394431	12.2042	2.95112e-34	6.71047e-33
ENSG00000168234	TTC39C	902.268	2.21529	0.181648	12.1955	3.28528e-34	7.45855e-33
ENSG00000074181	NOTCH3	2442.95	5.09467	0.418441	12.1754	4.20488e-34	9.47909e-33
ENSG00000170412	GPRC5C	156.412	6.51872	0.536188	12.1575	5.23189e-34	1.17667e-32
ENSG00000170293	CMTM8	193.881	-3.61732	0.297585	-12.1556	5.35628e-34	1.2037e-32
ENSG00000164418	GRIK2	145.492	5.60905	0.461543	12.1528	5.54047e-34	1.24412e-32
ENSG00000107796	ACTA2	23364.9	4.90503	0.40373	12.1493	5.78797e-34	1.29667e-32
ENSG00000100311	PDGFB	1006.17	-6.33389	0.522237	-12.1284	7.47091e-34	1.6685e-32
ENSG00000108823	SGCA	125.527	7.55635	0.623829	12.1128	9.03092e-34	2.01378e-32
ENSG00000130300	PLVAP	51.2102	-6.23932	0.515397	-12.1058	9.83589e-34	2.18989e-32
ENSG00000175556	LONRF3	141.964	-5.52256	0.456281	-12.1034	1.01328e-33	2.25426e-32
ENSG00000168505	GBX2	219.529	-6.19907	0.51227	-12.1012	1.0412e-33	2.31101e-32
ENSG00000223485	LINC01615	464.892	4.91112	0.406188	12.0907	1.18203e-33	2.61755e-32
ENSG00000145476	CYP4V2	1022.64	2.0114	0.166414	12.0868	1.24094e-33	2.74378e-32
ENSG00000189058	APOD	317.753	-3.80429	0.31531	-12.0653	1.6117e-33	3.54452e-32
ENSG00000144681	STAC	276.999	5.72311	0.474435	12.063	1.65645e-33	3.64015e-32
ENSG00000208024	MIR199A2	11.9924	6.68714	0.554791	12.0534	1.86025e-33	4.08489e-32
ENSG00000157680	DGKI	333.853	2.52692	0.209657	12.0526	1.87843e-33	4.12167e-32
ENSG00000187994	RINL	174.723	-2.0313	0.16854	-12.0523	1.88539e-33	4.1338e-32
ENSG00000213626	LBH	1617.19	4.88717	0.40561	12.0489	1.96494e-33	4.30494e-32
ENSG00000121797	CCRL2	132.995	-5.79183	0.480809	-12.046	2.03513e-33	4.45533e-32
ENSG00000212766	EWSAT1	45.7565	-5.25536	0.436784	-12.0319	2.41415e-33	5.26508e-32
ENSG00000111846	GCNT2	812.546	-6.03182	0.501831	-12.0196	2.80235e-33	6.10248e-32
ENSG00000164330	EBF1	462.319	5.57373	0.464234	12.0063	3.29266e-33	7.15396e-32
ENSG00000182329	KIAA2012	20.6526	6.86381	0.572127	11.997	3.68408e-33	7.99837e-32
ENSG00000151320	AKAP6	1192.47	4.70899	0.392651	11.9928	3.87459e-33	8.39931e-32
ENSG00000114279	FGF12	109.699	-5.72801	0.47773	-11.9901	4.00662e-33	8.67248e-32
ENSG00000143867	OSR1	704.552	6.76982	0.564618	11.9901	4.00537e-33	8.67248e-32
ENSG00000109846	CRYAB	3200.94	6.38289	0.532466	11.9874	4.13666e-33	8.94053e-32
ENSG00000174939	ASPHD1	502.442	2.80391	0.234018	11.9816	4.43792e-33	9.58444e-32
ENSG00000156299	TIAM1	260.702	6.30029	0.525934	11.9793	4.56408e-33	9.84953e-32
ENSG00000227533	SLC2A1-AS1	51.9147	2.112	0.176332	11.9774	4.66775e-33	1.00657e-31
ENSG00000162383	SLC1A7	70.8138	6.75101	0.563979	11.9703	5.08202e-33	1.09345e-31
ENSG00000122367	LDB3	77.6985	7.32072	0.613042	11.9416	7.18082e-33	1.54043e-31
ENSG00000185361	TNFAIP8L1	82.5871	-3.05399	0.255811	-11.9384	7.46068e-33	1.5969e-31
ENSG00000196517	SLC6A9	592.043	3.58077	0.300298	11.9241	8.8672e-33	1.88953e-31
ENSG00000112759	SLC29A1	10063.7	-2.60528	0.21858	-11.9191	9.41207e-33	2.00415e-31
ENSG00000168993	CPLX1	52.2521	-3.15121	0.264961	-11.8931	1.28566e-32	2.72152e-31
ENSG00000077264	PAK3	121.032	3.73675	0.31434	11.8876	1.3729e-32	2.89556e-31
ENSG00000188662	HILS1	76.3001	6.92353	0.582699	11.8818	1.47136e-32	3.09189e-31
ENSG00000224259	LINC01133	599.668	6.64446	0.559481	11.8761	1.57503e-32	3.30493e-31
ENSG00000113924	HGD	61.3091	4.19351	0.353504	11.8627	1.84927e-32	3.86348e-31
ENSG00000101665	SMAD7	2430.11	2.35857	0.198863	11.8603	1.90389e-32	3.97471e-31
ENSG00000177335	C8orf31	64.1187	4.99141	0.420879	11.8595	1.92157e-32	4.00873e-31
ENSG00000118503	TNFAIP3	3500.77	3.51987	0.296867	11.8567	1.98659e-32	4.14136e-31
ENSG00000103723	AP3B2	15.2876	5.52419	0.466217	11.849	2.17851e-32	4.53817e-31
ENSG00000196972	SMIM10L2B	47.372	2.69523	0.22767	11.8383	2.47403e-32	5.14634e-31
ENSG00000164176	EDIL3	5782.3	3.98049	0.336345	11.8345	2.58789e-32	5.37541e-31
ENSG00000163898	LIPH	284.541	5.3027	0.448144	11.8326	2.64845e-32	5.49724e-31
ENSG00000163359	COL6A3	147329	6.53454	0.552328	11.8309	2.70245e-32	5.60529e-31
ENSG00000106819	ASPN	1196.11	6.78281	0.573816	11.8205	3.05756e-32	6.32364e-31
ENSG00000153253	SCN3A	315.817	7.44664	0.630654	11.8078	3.5571e-32	7.35151e-31
ENSG00000091409	ITGA6	17835	-2.87514	0.243561	-11.8046	3.69487e-32	7.63077e-31
ENSG00000171631	P2RY6	116.759	4.05301	0.344472	11.7658	5.85354e-32	1.19943e-30
ENSG00000105538	RASIP1	2486.19	-4.91011	0.417352	-11.7649	5.91938e-32	1.21206e-30
ENSG00000130720	FIBCD1	70.5235	4.40531	0.37479	11.7541	6.72782e-32	1.37565e-30
ENSG00000106799	TGFBR1	7331.57	2.29214	0.19516	11.7449	7.50067e-32	1.53258e-30
ENSG00000113578	FGF1	196.328	4.85093	0.41304	11.7445	7.54102e-32	1.53974e-30
ENSG00000203943	SAMD13	111.243	-2.35944	0.201131	-11.7308	8.85771e-32	1.80602e-30
ENSG00000078399	HOXA9	138.34	-6.7361	0.574388	-11.7274	9.22053e-32	1.87789e-30
ENSG00000159674	SPON2	581.316	5.42508	0.463827	11.6963	1.33067e-31	2.69217e-30
ENSG00000086289	EPDR1	7409.84	5.54697	0.474675	11.6858	1.50586e-31	3.04234e-30
ENSG00000185499	MUC1	469.364	2.93728	0.251517	11.6782	1.6466e-31	3.32203e-30
ENSG00000177675	CD163L1	765.604	-3.4186	0.292851	-11.6735	1.74082e-31	3.5072e-30
ENSG00000132386	SERPINF1	2737.64	5.77503	0.494795	11.6715	1.78161e-31	3.58687e-30
ENSG00000113645	WWC1	368.749	4.8442	0.415372	11.6623	1.98536e-31	3.99149e-30
ENSG00000135472	FAIM2	36.8926	6.80911	0.585363	11.6323	2.82444e-31	5.65085e-30
ENSG00000065809	FAM107B	14286.3	-2.9491	0.253712	-11.6238	3.11924e-31	6.23198e-30
ENSG00000107821	KAZALD1	336.988	3.65031	0.314185	11.6184	3.3248e-31	6.63348e-30
ENSG00000139304	PTPRQ	137.497	5.77825	0.497529	11.6139	3.50239e-31	6.97332e-30
ENSG00000123453	SARDH	111.498	4.41067	0.380218	11.6004	4.1032e-31	8.1414e-30
ENSG00000115738	ID2	1338.56	3.37938	0.29142	11.5962	4.30644e-31	8.52705e-30
ENSG00000163485	ADORA1	45.4064	6.86169	0.592155	11.5876	4.76021e-31	9.40616e-30
ENSG00000164694	FNDC1	152.614	5.92887	0.512215	11.575	5.5195e-31	1.0899e-29
ENSG00000188013	MEIS3P2	106.291	2.90718	0.251231	11.5717	5.73032e-31	1.12921e-29
ENSG00000167995	BEST1	489.374	2.48319	0.214819	11.5594	6.61404e-31	1.29837e-29
ENSG00000151632	AKR1C2	2044.15	3.28718	0.28447	11.5554	6.93023e-31	1.35916e-29
ENSG00000137809	ITGA11	6814.58	5.63422	0.487874	11.5485	7.51139e-31	1.47113e-29
ENSG00000146021	KLHL3	440.231	-3.16175	0.273896	-11.5436	7.94898e-31	1.55577e-29
ENSG00000128510	CPA4	5626.63	5.50094	0.476591	11.5423	8.07774e-31	1.5799e-29
ENSG00000187123	LYPD6	66.7391	-6.1896	0.536273	-11.5419	8.11301e-31	1.58573e-29
ENSG00000223414	LINC00473	254.226	10.0119	0.867778	11.5374	8.55179e-31	1.66696e-29
ENSG00000163694	RBM47	148.216	6.74373	0.584767	11.5323	9.06633e-31	1.76368e-29
ENSG00000204634	TBC1D8	2308.15	-2.15284	0.186773	-11.5265	9.69977e-31	1.88309e-29
ENSG00000095739	BAMBI	2168.9	2.82092	0.244804	11.5232	1.00846e-30	1.95516e-29
ENSG00000215866	LINC01356	104.587	-3.38351	0.293829	-11.5152	1.10559e-30	2.13915e-29
ENSG00000107159	CA9	51.776	6.4663	0.561661	11.5128	1.13708e-30	2.19862e-29
ENSG00000110077	MS4A6A	15.5597	-6.41897	0.557813	-11.5074	1.21104e-30	2.33535e-29
ENSG00000213996	TM6SF2	43.3513	4.55942	0.397466	11.4712	1.8404e-30	3.53245e-29
ENSG00000168672	FAM84B	400.503	-4.4925	0.39197	-11.4614	2.06249e-30	3.95082e-29
ENSG00000115415	STAT1	18946.4	2.02222	0.176442	11.4611	2.06899e-30	3.96063e-29
ENSG00000114790	ARHGEF26	539.762	2.91358	0.254245	11.4597	2.10186e-30	4.01822e-29
ENSG00000205078	SYCE1L	70.1437	-3.30447	0.288755	-11.4438	2.52472e-30	4.80113e-29
ENSG00000196169	KIF19	29.799	-7.00858	0.612539	-11.4418	2.5832e-30	4.9091e-29
ENSG00000182985	CADM1	146.473	-4.93487	0.43206	-11.4217	3.25749e-30	6.17829e-29
ENSG00000173535	TNFRSF10C	1466.48	-2.49373	0.218401	-11.4181	3.39489e-30	6.43465e-29
ENSG00000144115	THNSL2	153.982	5.40041	0.473332	11.4093	3.75533e-30	7.10849e-29
ENSG00000163393	SLC22A15	55.1335	5.30233	0.46474	11.4092	3.7605e-30	7.11358e-29
ENSG00000152580	IGSF10	36.4884	3.70867	0.325078	11.4085	3.78998e-30	7.16465e-29
ENSG00000059377	TBXAS1	204.947	-2.51091	0.220128	-11.4066	3.87663e-30	7.32365e-29
ENSG00000175984	DENND2C	192.549	2.49856	0.21908	11.4048	3.95657e-30	7.46489e-29
ENSG00000102053	ZC3H12B	60.2821	3.31904	0.291375	11.391	4.63805e-30	8.73919e-29
ENSG00000128045	RASL11B	64.8683	5.09352	0.447232	11.389	4.74455e-30	8.92819e-29
ENSG00000121898	CPXM2	2652.65	5.33553	0.469098	11.374	5.63322e-30	1.05591e-28
ENSG00000169684	CHRNA5	350.061	-2.7335	0.240437	-11.3689	5.97402e-30	1.11833e-28
ENSG00000123358	NR4A1	2145	3.73706	0.328788	11.3662	6.16472e-30	1.15253e-28
ENSG00000184347	SLIT3	6390.89	6.00294	0.52819	11.3651	6.23752e-30	1.16539e-28
ENSG00000205129	C4orf47	82.4637	3.28733	0.289381	11.3599	6.6246e-30	1.23531e-28
ENSG00000196209	SIRPB2	75.1921	-4.98006	0.438405	-11.3595	6.65296e-30	1.23979e-28
ENSG00000204131	NHSL2	1841.54	-4.49589	0.395812	-11.3586	6.71828e-30	1.25115e-28
ENSG00000145777	TSLP	783.465	2.89932	0.255261	11.3583	6.74801e-30	1.25588e-28
ENSG00000227036	LINC00511	70.4499	5.8252	0.512931	11.3567	6.8698e-30	1.27772e-28
ENSG00000114251	WNT5A	526.985	4.61361	0.406513	11.3492	7.48019e-30	1.38766e-28
ENSG00000162814	SPATA17	19.5276	3.70652	0.32672	11.3446	7.88542e-30	1.46002e-28
ENSG00000160460	SPTBN4	40.9579	3.50302	0.309325	11.3247	9.89822e-30	1.82449e-28
ENSG00000108821	COL1A1	495156	6.82725	0.602927	11.3235	1.00356e-29	1.84863e-28
ENSG00000225684	FAM225B	134.085	4.75117	0.419971	11.3131	1.13032e-29	2.07022e-28
ENSG00000168621	GDNF	11.1568	6.50986	0.577052	11.2812	1.6244e-29	2.96196e-28
ENSG00000128482	RNF112	43.8274	5.43613	0.48213	11.2752	1.73933e-29	3.16751e-28
ENSG00000139629	GALNT6	3294.8	-3.39157	0.300998	-11.2677	1.8935e-29	3.43742e-28
ENSG00000129116	PALLD	23633.9	2.28727	0.203129	11.2602	2.0623e-29	3.73444e-28
ENSG00000072818	ACAP1	89.0903	2.07095	0.184016	11.2542	2.20776e-29	3.99533e-28
ENSG00000112655	PTK7	6458.58	2.51323	0.223408	11.2495	2.32989e-29	4.20842e-28
ENSG00000170629	DPY19L2P2	162.249	2.41718	0.215026	11.2413	2.55461e-29	4.5999e-28
ENSG00000154734	ADAMTS1	40287.9	2.70024	0.240208	11.2413	2.55725e-29	4.60177e-28
ENSG00000162745	OLFML2B	225.59	3.31261	0.294761	11.2383	2.64419e-29	4.75526e-28
ENSG00000224116	INHBA-AS1	42.9257	4.60442	0.409738	11.2375	2.66938e-29	4.79757e-28
ENSG00000019102	VSIG2	75.8839	-3.53901	0.315282	-11.2249	3.07684e-29	5.51267e-28
ENSG00000183715	OPCML	40.0226	4.14141	0.36936	11.2124	3.5454e-29	6.34394e-28
ENSG00000099365	STX1B	82.6764	2.42375	0.216175	11.212	3.56075e-29	6.36385e-28
ENSG00000064692	SNCAIP	385.348	-4.1953	0.374259	-11.2096	3.6579e-29	6.53343e-28
ENSG00000085563	ABCB1	1261.32	-5.01548	0.447446	-11.2091	3.67783e-29	6.56495e-28
ENSG00000168398	BDKRB2	2482.31	6.53394	0.583366	11.2004	4.05837e-29	7.23524e-28
ENSG00000172955	ADH6	34.8801	3.19237	0.285042	11.1996	4.09392e-29	7.29412e-28
ENSG00000159200	RCAN1	9925.68	2.69308	0.240557	11.1952	4.30559e-29	7.66176e-28
ENSG00000137033	IL33	1148.7	4.66878	0.417111	11.1931	4.40536e-29	7.83448e-28
ENSG00000138378	STAT4	100.846	5.20374	0.465465	11.1797	5.1291e-29	9.1047e-28
ENSG00000144488	ESPNL	42.2739	4.567	0.408744	11.1733	5.51231e-29	9.77289e-28
ENSG00000225269	LINC00705	161.348	-3.88006	0.348253	-11.1415	7.87873e-29	1.3883e-27
ENSG00000180914	OXTR	296.24	5.54067	0.498797	11.1081	1.14614e-28	2.00732e-27
ENSG00000132749	TESMIN	167.817	-3.18116	0.286453	-11.1054	1.18148e-28	2.06794e-27
ENSG00000211764	TRBJ2-1	34.8726	-7.50294	0.675707	-11.1038	1.20174e-28	2.10213e-27
ENSG00000126838	PZP	27.6919	-5.31116	0.478379	-11.1024	1.22103e-28	2.13458e-27
ENSG00000169439	SDC2	2797.99	3.92882	0.353958	11.0997	1.25887e-28	2.19674e-27
ENSG00000146122	DAAM2	95.8281	6.063	0.546278	11.0988	1.27207e-28	2.21841e-27
ENSG00000133863	TEX15	29.8982	-6.09632	0.549751	-11.0892	1.41506e-28	2.45887e-27
ENSG00000103485	QPRT	154.134	5.1625	0.465949	11.0796	1.57656e-28	2.73454e-27
ENSG00000174004	NRROS	24.889	-3.56331	0.321726	-11.0756	1.64767e-28	2.85273e-27
ENSG00000123119	NECAB1	105.079	2.07902	0.187719	11.0751	1.65628e-28	2.86591e-27
ENSG00000185630	PBX1	3375.91	3.15803	0.285183	11.0737	1.68351e-28	2.91128e-27
ENSG00000057704	TMCC3	2260.57	-5.22487	0.472113	-11.067	1.81382e-28	3.12537e-27
ENSG00000106852	LHX6	141.186	-6.21431	0.561829	-11.0609	1.94216e-28	3.34051e-27
ENSG00000184470	TXNRD2	3287.08	-2.03446	0.183949	-11.0599	1.96324e-28	3.37475e-27
ENSG00000186417	GLDN	93.3832	8.98894	0.813354	11.0517	2.15108e-28	3.69545e-27
ENSG00000162849	KIF26B	1187.7	4.16987	0.3774	11.049	2.21767e-28	3.8053e-27
ENSG00000156453	PCDH1	11682.5	-3.65385	0.330816	-11.045	2.31841e-28	3.97581e-27
ENSG00000188596	CFAP54	1262.79	-2.67187	0.241929	-11.044	2.34298e-28	4.01554e-27
ENSG00000183421	RIPK4	236.797	7.02242	0.636013	11.0413	2.4146e-28	4.13583e-27
ENSG00000138061	CYP1B1	3974.72	6.24115	0.565858	11.0295	2.75258e-28	4.70913e-27
ENSG00000164512	ANKRD55	132.906	-2.34314	0.212514	-11.0258	2.86947e-28	4.89583e-27
ENSG00000149968	MMP3	187.939	5.40802	0.490489	11.0258	2.8702e-28	4.89583e-27
ENSG00000158220	ESYT3	30.535	3.93488	0.356971	11.023	2.96113e-28	5.04795e-27
ENSG00000166246	C16orf71	59.2468	2.32085	0.211122	10.9929	4.13285e-28	7.00397e-27
ENSG00000189409	MMP23B	107.775	3.18289	0.289807	10.9828	4.62321e-28	7.82118e-27
ENSG00000137573	SULF1	56175.5	3.85161	0.350754	10.981	4.71894e-28	7.96909e-27
ENSG00000189001	SBSN	26.0237	6.23311	0.567732	10.979	4.82451e-28	8.1426e-27
ENSG00000144355	DLX1	175.56	3.20484	0.291943	10.9776	4.89725e-28	8.26052e-27
ENSG00000188732	FAM221A	161.351	-2.2352	0.203712	-10.9724	5.18875e-28	8.72667e-27
ENSG00000229515	FLT1P1	59.8279	-5.0074	0.456442	-10.9705	5.29764e-28	8.90461e-27
ENSG00000204580	DDR1	2788.24	2.04283	0.186305	10.965	5.63136e-28	9.44351e-27
ENSG00000156113	KCNMA1	631.501	4.98269	0.454425	10.9648	5.64088e-28	9.45397e-27
ENSG00000168477	TNXB	2498.14	5.51359	0.50345	10.9516	6.52705e-28	1.09074e-26
ENSG00000198720	ANKRD13B	1274.46	-2.16165	0.197456	-10.9475	6.82886e-28	1.1392e-26
ENSG00000159708	LRRC36	29.7987	-5.33946	0.487838	-10.9451	7.01167e-28	1.16902e-26
ENSG00000173391	OLR1	43.4533	7.08865	0.648937	10.9235	8.9014e-28	1.4798e-26
ENSG00000162520	SYNC	797.195	2.45601	0.22496	10.9175	9.50638e-28	1.57764e-26
ENSG00000183570	PCBP3	152.682	4.6516	0.426412	10.9087	1.04764e-27	1.73562e-26
ENSG00000154258	ABCA9	2712.01	3.63476	0.333384	10.9026	1.11978e-27	1.85195e-26
ENSG00000038427	VCAN	136915	5.64525	0.51812	10.8956	1.20908e-27	1.99506e-26
ENSG00000103942	HOMER2	71.4513	2.61075	0.23963	10.8949	1.21886e-27	2.01004e-26
ENSG00000143507	DUSP10	388.914	2.1684	0.199098	10.8911	1.27068e-27	2.0919e-26
ENSG00000076641	PAG1	23.9522	4.56738	0.419421	10.8897	1.29013e-27	2.12271e-26
ENSG00000166664	CHRFAM7A	43.2914	-2.91003	0.267505	-10.8784	1.46058e-27	2.40041e-26
ENSG00000113763	UNC5A	37.0992	-5.8663	0.539677	-10.87	1.60164e-27	2.62775e-26
ENSG00000146555	SDK1	292.634	-4.67164	0.429825	-10.8687	1.62499e-27	2.66302e-26
ENSG00000160223	ICOSLG	410.788	-3.97138	0.36566	-10.8609	1.77068e-27	2.89356e-26
ENSG00000115461	IGFBP5	4637.95	6.12785	0.565462	10.8369	2.30178e-27	3.73391e-26
ENSG00000225706	PTPRD-AS1	50.4266	4.86089	0.448629	10.835	2.34981e-27	3.80539e-26
ENSG00000179277	MEIS3P1	343.126	2.24299	0.207028	10.8342	2.3695e-27	3.83512e-26
ENSG00000112902	SEMA5A	428.761	5.91335	0.546372	10.8229	2.68081e-27	4.33656e-26
ENSG00000152154	TMEM178A	120.412	2.93029	0.270962	10.8144	2.94285e-27	4.74978e-26
ENSG00000074047	GLI2	1589.55	4.8383	0.44743	10.8135	2.97011e-27	4.79109e-26
ENSG00000178175	ZNF366	18.3318	-6.20059	0.573442	-10.8129	2.98945e-27	4.8169e-26
ENSG00000128284	APOL3	2039.58	-2.40035	0.222044	-10.8102	3.07937e-27	4.95624e-26
ENSG00000157168	NRG1	3440.11	-3.29472	0.304846	-10.8078	3.16069e-27	5.08429e-26
ENSG00000188112	C6orf132	62.2908	4.68863	0.434078	10.8013	3.39185e-27	5.44396e-26
ENSG00000161544	CYGB	690.438	3.75433	0.347893	10.7916	3.77133e-27	6.03957e-26
ENSG00000149506	ZP1	25.7903	5.35458	0.496478	10.7851	4.04682e-27	6.47357e-26
ENSG00000152932	RAB3C	32.2762	-6.86675	0.63732	-10.7744	4.54638e-27	7.25658e-26
ENSG00000153283	CD96	19.9607	6.21713	0.578933	10.7389	6.68114e-27	1.05935e-25
ENSG00000037280	FLT4	533.246	-6.16729	0.574608	-10.733	7.12112e-27	1.12601e-25
ENSG00000111186	WNT5B	281.731	5.43524	0.506535	10.7302	7.34115e-27	1.15826e-25
ENSG00000168542	COL3A1	256107	7.33989	0.684077	10.7296	7.38874e-27	1.16513e-25
ENSG00000138623	SEMA7A	421.462	3.50619	0.327164	10.7169	8.47734e-27	1.33387e-25
ENSG00000171476	HOPX	227.393	-6.47097	0.603868	-10.7159	8.57436e-27	1.3484e-25
ENSG00000114812	VIPR1	3422.95	3.93068	0.367064	10.7084	9.29381e-27	1.45836e-25
ENSG00000187764	SEMA4D	276.827	-2.64835	0.247632	-10.6947	1.07785e-26	1.68857e-25
ENSG00000143382	ADAMTSL4	1969.6	2.2974	0.214852	10.6929	1.09828e-26	1.71871e-25
ENSG00000215914	MMP23A	77.2028	3.46362	0.324423	10.6763	1.31455e-26	2.05047e-25
ENSG00000130477	UNC13A	268.772	4.64	0.434967	10.6675	1.44511e-26	2.25046e-25
ENSG00000135750	KCNK1	219.348	4.84312	0.454216	10.6626	1.52282e-26	2.36893e-25
ENSG00000169122	FAM110B	68.4498	3.35622	0.314776	10.6622	1.52886e-26	2.37703e-25
ENSG00000125384	PTGER2	35.8769	5.92948	0.55637	10.6574	1.60984e-26	2.50159e-25
ENSG00000165899	OTOGL	290.983	-3.92555	0.369056	-10.6367	2.01044e-26	3.11067e-25
ENSG00000165949	IFI27	7790.93	-4.56637	0.429954	-10.6206	2.39006e-26	3.69408e-25
ENSG00000149295	DRD2	54.8003	5.26686	0.496071	10.6171	2.48024e-26	3.83141e-25
ENSG00000196569	LAMA2	351.364	3.00209	0.28316	10.6021	2.91408e-26	4.49436e-25
ENSG00000169436	COL22A1	600.351	5.78483	0.545913	10.5966	3.08965e-26	4.75751e-25
ENSG00000153294	ADGRF4	289.744	8.57774	0.809834	10.592	3.24655e-26	4.99643e-25
ENSG00000171316	CHD7	1152.46	-2.64109	0.24936	-10.5915	3.26437e-26	5.02117e-25
ENSG00000099889	ARVCF	1625.85	-2.56263	0.241978	-10.5903	3.30468e-26	5.08046e-25
ENSG00000168952	STXBP6	231.253	6.96617	0.658088	10.5855	3.48052e-26	5.34509e-25
ENSG00000183762	KREMEN1	695.046	2.45337	0.23241	10.5562	4.75315e-26	7.24541e-25
ENSG00000183801	OLFML1	82.9614	6.58241	0.623554	10.5563	4.75126e-26	7.24541e-25
ENSG00000186310	NAP1L3	471.21	3.97906	0.377075	10.5524	4.94941e-26	7.53661e-25
ENSG00000161249	DMKN	107.069	8.27589	0.784479	10.5495	5.10447e-26	7.76451e-25
ENSG00000173320	STOX2	83.1757	4.48876	0.426467	10.5254	6.59503e-26	9.94258e-25
ENSG00000219438	FAM19A5	41.4001	6.79677	0.645795	10.5247	6.6504e-26	1.00208e-24
ENSG00000137501	SYTL2	643.931	3.16561	0.301181	10.5107	7.71447e-26	1.15999e-24
ENSG00000196155	PLEKHG4	1801.11	-2.01577	0.192046	-10.4963	8.98497e-26	1.35023e-24
ENSG00000181031	RPH3AL	88.0738	-2.95125	0.281383	-10.4884	9.76954e-26	1.46646e-24
ENSG00000214900	LINC01588	28.5393	2.58832	0.247056	10.4767	1.10547e-25	1.65254e-24
ENSG00000006740	ARHGAP44	126.735	2.554	0.243908	10.4711	1.1722e-25	1.74798e-24
ENSG00000170558	CDH2	45478.2	2.29478	0.219234	10.4673	1.22096e-25	1.81881e-24
ENSG00000155846	PPARGC1B	75.133	-3.07157	0.293646	-10.4601	1.31698e-25	1.9578e-24
ENSG00000143387	CTSK	1672.82	2.59993	0.248622	10.4574	1.35544e-25	2.0129e-24
ENSG00000177685	CRACR2B	189.307	-2.82906	0.270566	-10.4561	1.37422e-25	2.03974e-24
ENSG00000100027	YPEL1	103.214	-2.21242	0.21185	-10.4433	1.57226e-25	2.32172e-24
ENSG00000115844	DLX2	53.8736	4.38313	0.420458	10.4246	1.91382e-25	2.816e-24
ENSG00000108852	MPP2	62.146	3.04341	0.292022	10.4219	1.97068e-25	2.89522e-24
ENSG00000108602	ALDH3A1	57.3326	-5.58142	0.535944	-10.4142	2.13608e-25	3.13342e-24
ENSG00000140092	FBLN5	10894.2	3.65598	0.351297	10.4071	2.30149e-25	3.37263e-24
ENSG00000147234	FRMPD3	20.6027	5.85453	0.562554	10.407	2.30272e-25	3.37272e-24
ENSG00000102760	RGCC	171.137	-4.61794	0.44417	-10.3968	2.56407e-25	3.75169e-24
ENSG00000199038	MIR210	12.8828	4.96876	0.477923	10.3966	2.56986e-25	3.75825e-24
ENSG00000130052	STARD8	968.588	-2.22352	0.214069	-10.3869	2.84323e-25	4.14752e-24
ENSG00000181634	TNFSF15	105.499	-4.40427	0.424375	-10.3783	3.11369e-25	4.53975e-24
ENSG00000073146	MOV10L1	1110.86	-2.35178	0.226757	-10.3714	3.34714e-25	4.87272e-24
ENSG00000203876	ADD3-AS1	37.9941	4.96441	0.478715	10.3703	3.38527e-25	4.92326e-24
ENSG00000103522	IL21R	19.4696	5.62213	0.542477	10.3638	3.62202e-25	5.26225e-24
ENSG00000197249	SERPINA1	24.8139	6.3354	0.611415	10.3619	3.69662e-25	5.36522e-24
ENSG00000163827	LRRC2	42.731	4.89674	0.473516	10.3412	4.58682e-25	6.63718e-24
ENSG00000120217	CD274	1159.57	-2.9806	0.288345	-10.3369	4.79584e-25	6.92572e-24
ENSG00000119139	TJP2	2807.53	-2.04572	0.197906	-10.3368	4.80111e-25	6.92986e-24
ENSG00000174175	SELP	771.298	-3.8684	0.374381	-10.3328	5.00846e-25	7.22552e-24
ENSG00000167723	TRPV3	64.6836	4.65196	0.450224	10.3325	5.02148e-25	7.24069e-24
ENSG00000136883	KIF12	30.2007	-3.92966	0.380446	-10.3291	5.20506e-25	7.49789e-24
ENSG00000168961	LGALS9	1853.2	-2.75511	0.267042	-10.3172	5.89382e-25	8.47734e-24
ENSG00000171509	RXFP1	1211.83	7.86908	0.762924	10.3144	6.06757e-25	8.72288e-24
ENSG00000050438	SLC4A8	476.9	-2.60976	0.25316	-10.3087	6.43642e-25	9.23473e-24
ENSG00000185760	KCNQ5	614.416	5.61285	0.544955	10.2997	7.07048e-25	1.01293e-23
ENSG00000156869	FRRS1	217.355	2.72618	0.264716	10.2985	7.15664e-25	1.02426e-23
ENSG00000197046	SIGLEC15	96.9706	4.17764	0.405679	10.2979	7.20186e-25	1.03022e-23
ENSG00000133805	AMPD3	660.95	3.17097	0.307946	10.2972	7.25677e-25	1.03756e-23
ENSG00000168306	ACOX2	777.766	2.09319	0.20334	10.2941	7.49513e-25	1.07111e-23
ENSG00000151617	EDNRA	1081.85	5.55403	0.53986	10.2879	7.99004e-25	1.14013e-23
ENSG00000118804	STBD1	700.679	2.03576	0.198285	10.2668	9.94436e-25	1.41444e-23
ENSG00000108405	P2RX1	93.2511	5.67726	0.553291	10.2609	1.05734e-24	1.5028e-23
ENSG00000167083	GNGT2	32.4636	-4.32338	0.421386	-10.2599	1.06834e-24	1.51619e-23
ENSG00000226496	LINC00323	55.2869	-5.16355	0.503726	-10.2507	1.17477e-24	1.66643e-23
ENSG00000165821	SALL2	478.529	2.18648	0.213609	10.2359	1.36888e-24	1.9351e-23
ENSG00000099260	PALMD	11427.6	-3.52314	0.344621	-10.2232	1.56055e-24	2.19958e-23
ENSG00000203499	FAM83H-AS1	42.2035	3.61699	0.353929	10.2196	1.6209e-24	2.28352e-23
ENSG00000213949	ITGA1	4496.2	3.31554	0.324511	10.2171	1.6632e-24	2.34198e-23
ENSG00000152953	STK32B	1726.91	-3.30643	0.323734	-10.2134	1.72634e-24	2.42732e-23
ENSG00000186976	EFCAB6	64.0385	2.19612	0.215028	10.2132	1.73143e-24	2.43329e-23
ENSG00000148123	PLPPR1	11.2611	-6.31998	0.61932	-10.2047	1.88885e-24	2.64806e-23
ENSG00000172733	PURG	30.3403	-4.22861	0.414829	-10.1936	2.11748e-24	2.95995e-23
ENSG00000110900	TSPAN11	53.4941	-4.60632	0.451969	-10.1917	2.16034e-24	3.01693e-23
ENSG00000198467	TPM2	66756.4	2.19559	0.215662	10.1807	2.41807e-24	3.37032e-23
ENSG00000205038	PKHD1L1	124.791	-5.19631	0.511615	-10.1567	3.0943e-24	4.2983e-23
ENSG00000087589	CASS4	93.7965	5.73319	0.564721	10.1523	3.2377e-24	4.48884e-23
ENSG00000104043	ATP8B4	99.6253	5.63405	0.555719	10.1383	3.73514e-24	5.16607e-23
ENSG00000010310	GIPR	24.6407	3.61206	0.35706	10.1161	4.68768e-24	6.45256e-23
ENSG00000100321	SYNGR1	273.229	2.26162	0.223588	10.1151	4.73417e-24	6.51344e-23
ENSG00000076356	PLXNA2	7643.07	-3.04762	0.301681	-10.1021	5.40635e-24	7.42761e-23
ENSG00000163017	ACTG2	1489.86	7.48681	0.741368	10.0986	5.60113e-24	7.6769e-23
ENSG00000178538	CA8	53.3839	-6.7773	0.671365	-10.0948	5.82404e-24	7.97104e-23
ENSG00000132329	RAMP1	19.6806	6.08638	0.604824	10.063	8.04687e-24	1.09664e-22
ENSG00000168779	SHOX2	747.715	4.22665	0.420193	10.0588	8.39895e-24	1.14354e-22
ENSG00000170054	SERPINA9	172.349	7.73705	0.769458	10.0552	8.71533e-24	1.18494e-22
ENSG00000146966	DENND2A	642.736	2.81338	0.279898	10.0514	9.05301e-24	1.23027e-22
ENSG00000126467	TSKS	23.5451	4.98497	0.495966	10.051	9.09191e-24	1.23497e-22
ENSG00000206052	DOK6	15.7377	5.59933	0.557129	10.0503	9.15632e-24	1.24314e-22
ENSG00000158321	AUTS2	81.5592	5.04749	0.502255	10.0497	9.21921e-24	1.25109e-22
ENSG00000152056	AP1S3	1265.09	2.20865	0.21993	10.0425	9.90937e-24	1.34348e-22
ENSG00000164099	PRSS12	823.003	3.70906	0.369351	10.0421	9.95139e-24	1.34854e-22
ENSG00000154319	FAM167A	482.865	3.53582	0.35222	10.0387	1.03065e-23	1.39469e-22
ENSG00000144857	BOC	252.721	4.02159	0.400783	10.0343	1.07681e-23	1.45579e-22
ENSG00000205277	MUC12	37.302	3.59365	0.358846	10.0145	1.31653e-23	1.77571e-22
ENSG00000156755	IGKV1OR-2	200.827	-4.69169	0.469234	-9.99861	1.54552e-23	2.07873e-22
ENSG00000091831	ESR1	102.041	2.45705	0.246171	9.98105	1.8451e-23	2.47359e-22
ENSG00000136531	SCN2A	34.3985	5.77436	0.578723	9.97778	1.90693e-23	2.55291e-22
ENSG00000214140	PRCD	201.022	3.07826	0.308885	9.96571	2.15336e-23	2.8748e-22
ENSG00000204282	TNRC6C-AS1	122.035	-3.25001	0.326536	-9.95299	2.44715e-23	3.25948e-22
ENSG00000173898	SPTBN2	1535.96	-3.34007	0.335599	-9.95257	2.45745e-23	3.27168e-22
ENSG00000154493	C10orf90	14.4008	5.90264	0.593314	9.9486	2.55758e-23	3.40185e-22
ENSG00000198948	MFAP3L	149.073	3.78619	0.380665	9.94625	2.61872e-23	3.47996e-22
ENSG00000087116	ADAMTS2	1072.94	6.2671	0.630375	9.94186	2.73669e-23	3.63169e-22
ENSG00000122691	TWIST1	186.003	4.36286	0.439004	9.93808	2.84261e-23	3.77051e-22
ENSG00000136404	TM6SF1	2393.07	-2.20204	0.221633	-9.9355	2.91697e-23	3.86559e-22
ENSG00000185437	SH3BGR	292.541	2.72629	0.274473	9.93281	2.99683e-23	3.96595e-22
ENSG00000171951	SCG2	49.2291	5.12949	0.516437	9.93247	3.0071e-23	3.97772e-22
ENSG00000126562	WNK4	4546.77	3.6578	0.368295	9.93169	3.03064e-23	4.00517e-22
ENSG00000143786	CNIH3	237.944	2.73933	0.275958	9.92662	3.18885e-23	4.20653e-22
ENSG00000161133	USP41	251.19	-2.51884	0.253837	-9.92307	3.30425e-23	4.35079e-22
ENSG00000205363	C15orf59	86.4053	3.15145	0.317851	9.91486	3.58759e-23	4.71957e-22
ENSG00000168453	HR	70.7415	4.67858	0.471907	9.9142	3.6114e-23	4.74871e-22
ENSG00000160145	KALRN	646.084	-3.46317	0.349404	-9.91166	3.70455e-23	4.86898e-22
ENSG00000155011	DKK2	153.922	-4.43887	0.44872	-9.89229	4.49627e-23	5.87738e-22
ENSG00000132000	PODNL1	226.901	3.14344	0.318002	9.88497	4.83732e-23	6.30888e-22
ENSG00000158008	EXTL1	21.8461	5.82479	0.589891	9.87436	5.37762e-23	7.00087e-22
ENSG00000148842	CNNM2	93.0055	2.15769	0.218711	9.86546	5.87621e-23	7.64305e-22
ENSG00000156711	MAPK13	622.204	2.20009	0.223147	9.8594	6.24223e-23	8.10449e-22
ENSG00000163874	ZC3H12A	562.239	2.30463	0.233753	9.85923	6.2525e-23	8.11417e-22
ENSG00000175841	FAM172BP	8.69337	-5.55289	0.563963	-9.8462	7.11865e-23	9.20918e-22
ENSG00000184489	PTP4A3	100.184	-2.23803	0.227363	-9.84341	7.31869e-23	9.46371e-22
ENSG00000196876	SCN8A	1147.28	-2.71049	0.275448	-9.84029	7.54955e-23	9.75785e-22
ENSG00000101850	GPR143	77.7522	-3.44627	0.350222	-9.84024	7.5532e-23	9.7582e-22
ENSG00000105122	RASAL3	244.814	-5.07869	0.516199	-9.83862	7.67532e-23	9.91151e-22
ENSG00000221705	SNORA11E	13.4338	3.16751	0.322219	9.83031	8.33604e-23	1.07455e-21
ENSG00000204776	IGKV1OR-3	110.11	-4.87411	0.496173	-9.82341	8.92732e-23	1.14974e-21
ENSG00000139174	PRICKLE1	444.941	-2.85011	0.290346	-9.81624	9.58484e-23	1.23221e-21
ENSG00000081051	AFP	60.3673	4.63779	0.472954	9.806	1.06088e-22	1.359e-21
ENSG00000105290	APLP1	1387.38	2.11126	0.215338	9.80438	1.07808e-22	1.37981e-21
ENSG00000080823	MOK	2514.09	2.60562	0.266062	9.7933	1.20308e-22	1.53707e-21
ENSG00000163751	CPA3	79.6593	-5.58315	0.570912	-9.77935	1.381e-22	1.75892e-21
ENSG00000099994	SUSD2	311.741	3.58769	0.367053	9.77429	1.45167e-22	1.84403e-21
ENSG00000091536	MYO15A	28.4861	2.7527	0.281673	9.77271	1.47459e-22	1.87067e-21
ENSG00000126353	CCR7	36.5702	4.52316	0.462962	9.77005	1.51378e-22	1.9187e-21
ENSG00000139292	LGR5	70.047	7.05547	0.722337	9.76755	1.55152e-22	1.96488e-21
ENSG00000128165	ADM2	1093.11	3.36641	0.344657	9.76742	1.55354e-22	1.9665e-21
ENSG00000139737	SLAIN1	61.3437	-3.45005	0.353361	-9.76354	1.61421e-22	2.04061e-21
ENSG00000153707	PTPRD	1563.61	3.38596	0.346963	9.75884	1.69073e-22	2.13173e-21
ENSG00000197872	FAM49A	434.813	-3.53287	0.362323	-9.75062	1.83352e-22	2.30873e-21
ENSG00000152804	HHEX	3651.22	-2.68214	0.27526	-9.74404	1.95624e-22	2.45789e-21
ENSG00000176406	RIMS2	69.2476	-4.41842	0.453498	-9.74298	1.97677e-22	2.48151e-21
ENSG00000198185	ZNF334	270.861	3.96765	0.407373	9.7396	2.04362e-22	2.56432e-21
ENSG00000183246	RIMBP3C	36.3746	3.12045	0.320403	9.73914	2.05279e-22	2.5747e-21
ENSG00000153902	LGI4	27.3184	4.36689	0.448603	9.73441	2.15069e-22	2.69398e-21
ENSG00000197859	ADAMTSL2	76.8196	6.30191	0.647531	9.73222	2.19744e-22	2.74775e-21
ENSG00000218305	CDC14C	79.4445	2.45416	0.252323	9.72627	2.32972e-22	2.90685e-21
ENSG00000103489	XYLT1	219.047	4.40837	0.453393	9.72307	2.40428e-22	2.99859e-21
ENSG00000182177	ASB18	6.48562	-5.68721	0.584944	-9.72266	2.41401e-22	3.00941e-21
ENSG00000100312	ACR	11.7159	-5.5112	0.566914	-9.72141	2.44381e-22	3.04262e-21
ENSG00000175287	PHYHD1	108.629	2.43816	0.251522	9.69362	3.20947e-22	3.97357e-21
ENSG00000182612	TSPAN10	61.7178	2.12348	0.219091	9.69224	3.25309e-22	4.02411e-21
ENSG00000102802	MEDAG	1644.72	2.45211	0.253258	9.68227	3.58661e-22	4.42528e-21
ENSG00000061455	PRDM6	20.8498	5.29705	0.547557	9.67396	3.89021e-22	4.78961e-21
ENSG00000138134	STAMBPL1	567.576	2.31505	0.239863	9.65152	4.84317e-22	5.9451e-21
ENSG00000168675	LDLRAD4	76.422	-3.75311	0.388873	-9.65126	4.85558e-22	5.95781e-21
ENSG00000064886	CHI3L2	99.1642	7.34336	0.761434	9.64412	5.20539e-22	6.37345e-21
ENSG00000206190	ATP10A	716.078	7.04883	0.731757	9.63274	5.81581e-22	7.10274e-21
ENSG00000143127	ITGA10	2513.8	-3.23128	0.335743	-9.62429	6.31441e-22	7.6856e-21
ENSG00000161267	BDH1	259.691	-2.27038	0.23617	-9.61331	7.02553e-22	8.52592e-21
ENSG00000061337	LZTS1	17.8779	5.22519	0.543661	9.61112	7.17633e-22	8.70527e-21
ENSG00000181997	AQP7P2	26.4149	-4.50447	0.468949	-9.60545	7.58225e-22	9.18607e-21
ENSG00000220517	ASS1P1	146.971	3.99517	0.416045	9.60273	7.78519e-22	9.42005e-21
ENSG00000167771	RCOR2	35.501	3.30797	0.344906	9.59095	8.72741e-22	1.0538e-20
ENSG00000152760	TCTEX1D1	82.4971	-3.2766	0.34171	-9.58884	8.90766e-22	1.07421e-20
ENSG00000107282	APBA1	78.9036	-2.89815	0.302368	-9.58487	9.25771e-22	1.11503e-20
ENSG00000162738	VANGL2	33.3951	7.03712	0.734397	9.58217	9.50258e-22	1.14356e-20
ENSG00000204176	SYT15	470.744	2.59242	0.270835	9.57195	1.0491e-21	1.25621e-20
ENSG00000091879	ANGPT2	2765.27	-3.94682	0.412464	-9.56888	1.0807e-21	1.29351e-20
ENSG00000150394	CDH8	1213.62	6.60298	0.69008	9.56843	1.08544e-21	1.29865e-20
ENSG00000147206	NXF3	27.2236	5.55638	0.580716	9.56815	1.08837e-21	1.30161e-20
ENSG00000126218	F10	108.558	4.06059	0.424741	9.56014	1.17592e-21	1.40283e-20
ENSG00000081803	CADPS2	2827.74	-2.14071	0.224149	-9.55041	1.29183e-21	1.53982e-20
ENSG00000184792	OSBP2	539.928	-2.58959	0.271197	-9.54877	1.31246e-21	1.56377e-20
ENSG00000144354	CDCA7	1730.38	-2.36349	0.247711	-9.54132	1.41028e-21	1.67755e-20
ENSG00000103381	CPPED1	4566.62	-2.69617	0.282764	-9.53504	1.49822e-21	1.78068e-20
ENSG00000101605	MYOM1	83.7129	3.37737	0.354909	9.51618	1.79665e-21	2.1266e-20
ENSG00000143355	LHX9	102.542	7.53611	0.792095	9.51415	1.83209e-21	2.16766e-20
ENSG00000067715	SYT1	1099.87	3.60345	0.379026	9.50713	1.95998e-21	2.31139e-20
ENSG00000184985	SORCS2	49.4467	4.28367	0.450778	9.50283	2.04271e-21	2.40402e-20
ENSG00000162444	RBP7	30.9182	4.63293	0.487642	9.50068	2.08532e-21	2.4524e-20
ENSG00000042062	FAM65C	248.152	4.58146	0.482284	9.49951	2.10883e-21	2.4788e-20
ENSG00000198542	ITGBL1	3393.67	2.78627	0.293314	9.49927	2.11368e-21	2.48349e-20
ENSG00000113296	THBS4	9.59572	4.26254	0.448909	9.49534	2.195e-21	2.57484e-20
ENSG00000105889	STEAP1B	1225.61	-2.16489	0.228405	-9.47828	2.58506e-21	3.025e-20
ENSG00000130600	H19	2391.35	5.37646	0.567494	9.47405	2.69196e-21	3.14882e-20
ENSG00000177842	ZNF620	15.3836	-2.37224	0.250444	-9.47211	2.74242e-21	3.20394e-20
ENSG00000221475	SNORA11D	14.0036	3.10299	0.327611	9.47156	2.75686e-21	3.2182e-20
ENSG00000119514	GALNT12	302.169	2.80373	0.296094	9.46906	2.82365e-21	3.29349e-20
ENSG00000165323	FAT3	95.5518	5.95789	0.629286	9.4677	2.86069e-21	3.334e-20
ENSG00000163491	NEK10	294.159	2.27422	0.24022	9.46724	2.8733e-21	3.34735e-20
ENSG00000130303	BST2	2094.99	-4.58971	0.48529	-9.45767	3.1489e-21	3.66249e-20
ENSG00000135480	KRT7	30009.8	-3.50367	0.370511	-9.45633	3.18938e-21	3.70658e-20
ENSG00000106823	ECM2	96.0898	4.50127	0.476493	9.44667	3.49787e-21	4.05528e-20
ENSG00000133216	EPHB2	6316.71	-2.40862	0.255057	-9.44349	3.60581e-21	4.17537e-20
ENSG00000186642	PDE2A	872.349	-3.18013	0.336965	-9.43758	3.81479e-21	4.4156e-20
ENSG00000118113	MMP8	11.1398	5.24991	0.556427	9.43504	3.90835e-21	4.51844e-20
ENSG00000165078	CPA6	8.69106	5.9529	0.631043	9.43342	3.96918e-21	4.58693e-20
ENSG00000174125	TLR1	123.455	-2.17333	0.230773	-9.41763	4.61391e-21	5.3107e-20
ENSG00000214081	CYP4F30P	8.53561	-5.49042	0.583346	-9.41194	4.8708e-21	5.60414e-20
ENSG00000188820	FAM26F	50.258	2.86599	0.304534	9.41107	4.91122e-21	5.64614e-20
ENSG00000137942	FNBP1L	5742.69	-2.22916	0.236882	-9.41044	4.94042e-21	5.67745e-20
ENSG00000152270	PDE3B	123.971	-3.79298	0.403662	-9.39642	5.64487e-21	6.45608e-20
ENSG00000118407	FILIP1	1844.07	-3.20595	0.341354	-9.39187	5.89438e-21	6.7361e-20
ENSG00000021826	CPS1	571.334	2.44137	0.260239	9.38128	6.51788e-21	7.43095e-20
ENSG00000176771	NCKAP5	61.4077	2.69974	0.288097	9.37094	7.189e-21	8.1812e-20
ENSG00000175426	PCSK1	209.548	-3.76981	0.402294	-9.37079	7.1994e-21	8.1885e-20
ENSG00000106003	LFNG	99.8905	-2.73395	0.291989	-9.36319	7.73626e-21	8.79217e-20
ENSG00000182175	RGMA	55.7893	4.37975	0.468161	9.35523	8.34214e-21	9.45465e-20
ENSG00000221818	EBF2	110.768	6.85761	0.733307	9.35162	8.63164e-21	9.77891e-20
ENSG00000143995	MEIS1	2043.05	2.05419	0.219723	9.349	8.84801e-21	1.00201e-19
ENSG00000136237	RAPGEF5	2309.64	-3.98482	0.426276	-9.34797	8.93444e-21	1.011e-19
ENSG00000170989	S1PR1	4237.04	-3.2182	0.344379	-9.34494	9.19385e-21	1.03913e-19
ENSG00000142405	NLRP12	35.3444	-4.02544	0.430848	-9.34306	9.35865e-21	1.05734e-19
ENSG00000156920	ADGRG4	81.0257	-4.65152	0.497923	-9.34184	9.46741e-21	1.06879e-19
ENSG00000127324	TSPAN8	1741.97	4.41343	0.472552	9.33957	9.67297e-21	1.09114e-19
ENSG00000162892	IL24	196.306	7.42971	0.796738	9.32515	1.10825e-20	1.24625e-19
ENSG00000152137	HSPB8	328.091	2.29094	0.245935	9.31522	1.217e-20	1.3648e-19
ENSG00000180116	C12orf40	13.1666	2.28432	0.245412	9.30812	1.30119e-20	1.45751e-19
ENSG00000153822	KCNJ16	15.0908	-5.63034	0.604949	-9.30714	1.3132e-20	1.4704e-19
ENSG00000204780	IGKV1OR9-1	73.9349	-5.17414	0.555946	-9.30691	1.316e-20	1.47296e-19
ENSG00000119280	C1orf198	13313.3	2.58377	0.277655	9.30569	1.33123e-20	1.48885e-19
ENSG00000169071	ROR2	177.236	7.18701	0.772752	9.30054	1.39731e-20	1.56214e-19
ENSG00000108950	FAM20A	283.899	4.65577	0.501121	9.29072	1.53251e-20	1.71064e-19
ENSG00000091622	PITPNM3	204.378	-3.04366	0.3277	-9.28794	1.57296e-20	1.7524e-19
ENSG00000187672	ERC2	39.116	-4.2723	0.460347	-9.2806	1.68521e-20	1.87382e-19
ENSG00000114854	TNNC1	48.9173	5.41854	0.583942	9.27924	1.70695e-20	1.89654e-19
ENSG00000102524	TNFSF13B	29.7831	2.77324	0.298875	9.27893	1.71183e-20	1.90049e-19
ENSG00000129354	AP1M2	24.9519	4.87943	0.526123	9.27432	1.7875e-20	1.98221e-19
ENSG00000174938	SEZ6L2	1485.69	2.35695	0.254167	9.27326	1.80537e-20	2.00126e-19
ENSG00000171798	KNDC1	27.9009	3.51833	0.379492	9.27116	1.84128e-20	2.03872e-19
ENSG00000108688	CCL7	299.554	5.59302	0.603746	9.26386	1.97172e-20	2.17979e-19
ENSG00000198768	APCDD1L	989.737	4.53971	0.490356	9.25799	2.08316e-20	2.30122e-19
ENSG00000176115	AQP7P4	27.0311	-4.04248	0.436674	-9.25743	2.09406e-20	2.31237e-19
ENSG00000132429	POPDC3	357.951	2.74937	0.297253	9.24927	2.26039e-20	2.49318e-19
ENSG00000225380	IGKV1OR9-2	92.9367	-4.84749	0.524176	-9.24784	2.29071e-20	2.52469e-19
ENSG00000204128	C2orf72	30.8234	4.95434	0.535849	9.24577	2.33553e-20	2.57311e-19
ENSG00000179348	GATA2	2344.3	-2.40207	0.259835	-9.24461	2.3611e-20	2.60028e-19
ENSG00000108984	MAP2K6	207.638	-3.96307	0.429459	-9.22804	2.75618e-20	3.02267e-19
ENSG00000171877	FRMD5	2009.89	-2.10135	0.227808	-9.22422	2.85636e-20	3.13016e-19
ENSG00000129910	CDH15	9.19371	4.19071	0.454427	9.22198	2.9166e-20	3.19132e-19
ENSG00000168676	KCTD19	25.8158	-4.45909	0.483648	-9.21971	2.97912e-20	3.25725e-19
ENSG00000104332	SFRP1	10838.8	4.52919	0.491412	9.2167	3.06391e-20	3.34741e-19
ENSG00000227051	C14orf132	1776.09	2.38357	0.258844	9.20855	3.30571e-20	3.60748e-19
ENSG00000100593	ISM2	34.8986	5.2729	0.572861	9.20451	3.43233e-20	3.73858e-19
ENSG00000225953	SATB2-AS1	40.6358	2.38046	0.258658	9.20311	3.47747e-20	3.78631e-19
ENSG00000213071	LPAL2	55.1029	3.90703	0.42466	9.20037	3.56715e-20	3.88249e-19
ENSG00000186827	TNFRSF4	52.0899	-4.01501	0.436974	-9.18821	3.99419e-20	4.33745e-19
ENSG00000124920	MYRF	689.414	2.8714	0.312789	9.18001	4.31041e-20	4.6738e-19
ENSG00000134343	ANO3	54.8575	6.06393	0.660952	9.17454	4.53491e-20	4.90615e-19
ENSG00000171016	PYGO1	586.274	2.31937	0.252829	9.17368	4.5713e-20	4.9418e-19
ENSG00000211791	TRAV13-2	5.98062	-5.52552	0.602622	-9.16914	4.76803e-20	5.15061e-19
ENSG00000157399	ARSE	103.173	-2.1882	0.238822	-9.1625	5.07098e-20	5.46763e-19
ENSG00000179136	LINC00670	69.3402	7.69694	0.842894	9.13156	6.75201e-20	7.2422e-19
ENSG00000121966	CXCR4	1074.67	-4.87494	0.535033	-9.11146	8.12813e-20	8.68911e-19
ENSG00000073756	PTGS2	19152.9	3.55834	0.390752	9.10639	8.51726e-20	9.0916e-19
ENSG00000226604	PAPPA-AS2	10.6603	5.73109	0.629677	9.10164	8.89761e-20	9.48004e-19
ENSG00000072952	MRVI1	1022	4.64787	0.510923	9.097	9.28641e-20	9.88697e-19
ENSG00000228601	RPL39P	10.2902	5.04212	0.555174	9.08204	1.06559e-19	1.13074e-18
ENSG00000146477	SLC22A3	730.245	5.47009	0.602609	9.07734	1.11257e-19	1.17972e-18
ENSG00000226067	LINC00623	48.9975	3.77665	0.416271	9.07256	1.1625e-19	1.22995e-18
ENSG00000175356	SCUBE2	63.5317	2.7874	0.307259	9.07182	1.17044e-19	1.2379e-18
ENSG00000168916	ZNF608	1314.36	-2.71049	0.299446	-9.05169	1.40768e-19	1.48066e-18
ENSG00000151715	TMEM45B	22.3452	-5.32795	0.588857	-9.04796	1.45669e-19	1.53109e-18
ENSG00000169174	PCSK9	32.4243	3.76587	0.416729	9.03673	1.61424e-19	1.6936e-18
ENSG00000102043	MTMR8	10.5268	-5.1363	0.569123	-9.02494	1.79795e-19	1.88223e-18
ENSG00000156265	MAP3K7CL	2108.58	2.92885	0.324827	9.01667	1.93893e-19	2.02687e-18
ENSG00000141338	ABCA8	3488.55	2.85805	0.317315	9.00698	2.11812e-19	2.21178e-18
ENSG00000073350	LLGL2	72.4603	-2.51992	0.280029	-8.99879	2.28223e-19	2.38056e-18
ENSG00000197822	OCLN	223.723	-2.53302	0.281508	-8.99803	2.2981e-19	2.39624e-18
ENSG00000224594	RPL29P19	29.4311	2.78826	0.309973	8.99517	2.35858e-19	2.45842e-18
ENSG00000153234	NR4A2	345.43	3.17862	0.353707	8.9866	2.54997e-19	2.65311e-18
ENSG00000040731	CDH10	473.616	4.18659	0.466501	8.97444	2.84786e-19	2.95558e-18
ENSG00000124440	HIF3A	515.284	-2.69432	0.300321	-8.97149	2.92533e-19	3.03161e-18
ENSG00000165757	KIAA1462	687.149	-2.69373	0.300329	-8.96926	2.98509e-19	3.0902e-18
ENSG00000152049	KCNE4	528.074	5.9222	0.660383	8.96782	3.02432e-19	3.1297e-18
ENSG00000145506	NKD2	191.68	6.70605	0.747832	8.96732	3.03811e-19	3.14283e-18
ENSG00000118997	DNAH7	18.0225	2.39369	0.26696	8.96645	3.0623e-19	3.16559e-18
ENSG00000160539	PLPP7	112.395	3.29789	0.368662	8.94556	3.70073e-19	3.81187e-18
ENSG00000225756	DBH-AS1	20.5964	4.76581	0.532783	8.94513	3.71512e-19	3.82533e-18
ENSG00000183783	KCTD8	46.2574	6.30586	0.705631	8.93649	4.01711e-19	4.12155e-18
ENSG00000160013	PTGIR	717.006	2.71624	0.304283	8.92671	4.38884e-19	4.49653e-18
ENSG00000138356	AOX1	1645.79	2.31831	0.260271	8.90731	5.22853e-19	5.33595e-18
ENSG00000117069	ST6GALNAC5	40.833	6.55503	0.736263	8.9031	5.43086e-19	5.5346e-18
ENSG00000115252	PDE1A	219.815	4.32882	0.486406	8.89961	5.6042e-19	5.70721e-18
ENSG00000126583	PRKCG	11.3458	3.45186	0.387989	8.8968	5.74809e-19	5.84754e-18
ENSG00000101842	VSIG1	45.2524	-2.92558	0.328921	-8.89448	5.86924e-19	5.96868e-18
ENSG00000226808	LINC00840	28.7107	-3.45312	0.388658	-8.88472	6.40797e-19	6.50048e-18
ENSG00000188848	BEND4	16.858	-5.63693	0.634494	-8.88414	6.44174e-19	6.53014e-18
ENSG00000091656	ZFHX4	6369.92	2.93244	0.330235	8.87985	6.69499e-19	6.78448e-18
ENSG00000147655	RSPO2	11.6714	7.15431	0.805859	8.87787	6.81518e-19	6.89899e-18
ENSG00000103528	SYT17	11.5786	-3.72343	0.419689	-8.87188	7.19237e-19	7.27571e-18
ENSG00000168405	CMAHP	1190.51	3.1921	0.360007	8.86676	7.53055e-19	7.60179e-18
ENSG00000197558	SSPO	98.561	2.30794	0.260415	8.86254	7.82107e-19	7.89229e-18
ENSG00000118513	MYB	121.886	3.78709	0.427658	8.85542	8.33721e-19	8.39843e-18
ENSG00000174576	NPAS4	8.98058	5.26844	0.595015	8.8543	8.42125e-19	8.47716e-18
ENSG00000186466	AQP7P1	66.9891	-4.02741	0.455361	-8.84442	9.20068e-19	9.23594e-18
ENSG00000163734	CXCL3	3407.69	3.5991	0.407002	8.84297	9.32097e-19	9.34042e-18
ENSG00000169885	CALML6	29.9991	2.33528	0.264089	8.84277	9.33728e-19	9.35351e-18
ENSG00000166669	ATF7IP2	498.392	-2.0992	0.237594	-8.83522	9.98977e-19	9.98977e-18
ENSG00000167306	MYO5B	53.3599	-2.06397	0.233779	-8.8287	1.05895e-18	1.05712e-17
ENSG00000107317	PTGDS	139.857	4.76048	0.53927	8.82764	1.0691e-18	1.06687e-17
ENSG00000074964	ARHGEF10L	1058.38	2.10212	0.238404	8.81746	1.17083e-18	1.16276e-17
ENSG00000109472	CPE	464.937	3.7256	0.422583	8.81625	1.18353e-18	1.17497e-17
ENSG00000164093	PITX2	156.618	5.7696	0.654814	8.81106	1.23964e-18	1.22982e-17
ENSG00000175344	CHRNA7	53.9056	-3.28035	0.372715	-8.80123	1.35327e-18	1.3384e-17
ENSG00000146197	SCUBE3	1133.38	3.51157	0.399123	8.79821	1.39021e-18	1.37306e-17
ENSG00000166592	RRAD	234.146	3.24335	0.369193	8.78498	1.56393e-18	1.53988e-17
ENSG00000109452	INPP4B	387.133	2.12863	0.24253	8.7768	1.68196e-18	1.65327e-17
ENSG00000172139	SLC9C1	20.5857	3.082	0.351175	8.77626	1.69008e-18	1.66068e-17
ENSG00000170044	ZPLD1	39.9445	5.49517	0.626744	8.76781	1.82182e-18	1.78708e-17
ENSG00000162267	ITIH3	32.7194	4.9716	0.567396	8.76214	1.91582e-18	1.87802e-17
ENSG00000169760	NLGN1	1582.48	-3.56881	0.407454	-8.75881	1.97315e-18	1.93355e-17
ENSG00000176678	FOXL1	110.395	2.13075	0.243363	8.75545	2.03297e-18	1.98947e-17
ENSG00000182389	CACNB4	209.519	3.38926	0.387208	8.75305	2.07657e-18	2.03144e-17
ENSG00000010610	CD4	17.2212	3.56707	0.407792	8.74728	2.1856e-18	2.13593e-17
ENSG00000172995	ARPP21	42.3628	6.24378	0.713909	8.7459	2.21236e-18	2.16061e-17
ENSG00000152092	ASTN1	16.7027	5.43517	0.621995	8.73829	2.36673e-18	2.30746e-17
ENSG00000189129	PLAC9	365.243	2.36849	0.27111	8.73625	2.40969e-18	2.34855e-17
ENSG00000159023	EPB41	3516.91	-2.24637	0.257256	-8.73203	2.50134e-18	2.43294e-17
ENSG00000197361	FBXL22	45.7073	2.52614	0.289322	8.73125	2.51876e-18	2.44823e-17
ENSG00000227502	LINC01268	30.2684	-3.26153	0.373626	-8.72939	2.56052e-18	2.48798e-17
ENSG00000204397	CARD16	1381.55	-2.68092	0.307237	-8.72593	2.64009e-18	2.56357e-17
ENSG00000163814	CDCP1	389.038	2.98978	0.342877	8.71967	2.79023e-18	2.70753e-17
ENSG00000143851	PTPN7	16.4029	-4.36963	0.501308	-8.71647	2.87013e-18	2.78412e-17
ENSG00000101265	RASSF2	3600	-2.82331	0.324735	-8.69419	3.49314e-18	3.3737e-17
ENSG00000184305	CCSER1	9.12388	-5.07518	0.584207	-8.68729	3.71184e-18	3.58132e-17
ENSG00000166960	CCDC178	20.508	-4.43956	0.511381	-8.68152	3.90519e-18	3.76409e-17
ENSG00000050344	NFE2L3	8413.83	-2.47901	0.285599	-8.68004	3.95622e-18	3.81199e-17
ENSG00000144834	TAGLN3	51.3255	6.18461	0.714085	8.66088	4.68128e-18	4.49259e-17
ENSG00000197405	C5AR1	8.65859	5.11043	0.590736	8.65096	5.10685e-18	4.88637e-17
ENSG00000137101	CD72	25.4249	2.32006	0.268318	8.64667	5.30235e-18	5.07173e-17
ENSG00000157423	HYDIN	29.028	3.63855	0.420954	8.64358	5.44801e-18	5.20415e-17
ENSG00000124116	WFDC3	17.1342	3.82723	0.4439	8.62183	6.58939e-18	6.26329e-17
ENSG00000137193	PIM1	395.515	2.39784	0.278348	8.61455	7.02182e-18	6.65456e-17
ENSG00000135437	RDH5	514.504	2.02039	0.234568	8.61325	7.10176e-18	6.72811e-17
ENSG00000228495	LINC01013	4361.88	-3.99025	0.463287	-8.61293	7.12178e-18	6.74486e-17
ENSG00000205978	NYNRIN	156.057	-2.02319	0.234938	-8.61162	7.20341e-18	6.81992e-17
ENSG00000060718	COL11A1	1291.61	4.563	0.530026	8.60901	7.36951e-18	6.9726e-17
ENSG00000131477	RAMP2	372.12	-2.69604	0.313211	-8.60774	7.45161e-18	7.04334e-17
ENSG00000177453	NIM1K	10.337	4.1356	0.480773	8.60198	7.83496e-18	7.39113e-17
ENSG00000198520	C1orf228	24.5948	3.20728	0.373254	8.59275	8.49094e-18	7.99164e-17
ENSG00000137968	SLC44A5	297.547	-3.21948	0.374708	-8.59198	8.54829e-18	8.04299e-17
ENSG00000139364	TMEM132B	84.9135	2.95779	0.344415	8.58788	8.8587e-18	8.31604e-17
ENSG00000214944	ARHGEF28	7621.66	-2.1268	0.247655	-8.58776	8.8681e-18	8.32215e-17
ENSG00000158769	F11R	4855.68	-2.40475	0.280023	-8.58771	8.87206e-18	8.32316e-17
ENSG00000186854	TRABD2A	514.578	2.12517	0.248066	8.56696	1.06249e-17	9.93201e-17
ENSG00000165795	NDRG2	39.6679	4.24804	0.49668	8.55288	1.2005e-17	1.11821e-16
ENSG00000136546	SCN7A	11.9541	6.10864	0.714712	8.547	1.26334e-17	1.17561e-16
ENSG00000000971	CFH	35546.1	2.00291	0.23448	8.54194	1.31983e-17	1.22698e-16
ENSG00000166920	C15orf48	62.4218	3.90994	0.458348	8.53051	1.45709e-17	1.3498e-16
ENSG00000197971	MBP	249.2	2.56201	0.300605	8.52284	1.55687e-17	1.44038e-16
ENSG00000119457	SLC46A2	17.9552	2.59111	0.304124	8.5199	1.59694e-17	1.47698e-16
ENSG00000167972	ABCA3	4034.81	-3.44094	0.404022	-8.51671	1.64152e-17	1.51675e-16
ENSG00000164855	TMEM184A	69.4948	2.84482	0.334443	8.50614	1.79816e-17	1.65829e-16
ENSG00000196136	SERPINA3	244.905	3.95567	0.465101	8.50498	1.81628e-17	1.67286e-16
ENSG00000160097	FNDC5	71.9494	2.80203	0.329771	8.49689	1.94739e-17	1.7879e-16
ENSG00000187758	ADH1A	23.4713	5.16187	0.607567	8.49597	1.96281e-17	1.80149e-16
ENSG00000136960	ENPP2	767.946	5.06696	0.597687	8.47762	2.29845e-17	2.09618e-16
ENSG00000113532	ST8SIA4	96.6216	-2.98837	0.352539	-8.4767	2.31672e-17	2.11218e-16
ENSG00000099204	ABLIM1	6285.33	-2.71433	0.320651	-8.46506	2.56024e-17	2.32536e-16
ENSG00000162551	ALPL	298.226	3.43878	0.406556	8.45833	2.71244e-17	2.4605e-16
ENSG00000139178	C1RL	6347.63	2.07666	0.245635	8.45428	2.80826e-17	2.54501e-16
ENSG00000218336	TENM3	1392.33	-2.83318	0.335458	-8.44571	3.02192e-17	2.72834e-16
ENSG00000135074	ADAM19	19431.6	2.23991	0.265219	8.4455	3.02753e-17	2.7317e-16
ENSG00000144649	FAM198A	12.2919	5.74494	0.680308	8.44462	3.05033e-17	2.75141e-16
ENSG00000154654	NCAM2	305.005	2.87976	0.341108	8.44237	3.10975e-17	2.80325e-16
ENSG00000103044	HAS3	397.942	3.53443	0.418943	8.43653	3.26899e-17	2.94313e-16
ENSG00000159263	SIM2	516.856	4.38646	0.520179	8.43261	3.38036e-17	3.04053e-16
ENSG00000204183	GDF5OS	114.501	3.40447	0.403808	8.4309	3.43015e-17	3.08435e-16
ENSG00000159374	M1AP	18.1736	3.5988	0.426964	8.42882	3.49166e-17	3.1377e-16
ENSG00000140563	MCTP2	323.648	4.00395	0.47511	8.42742	3.53379e-17	3.17358e-16
ENSG00000156804	FBXO32	2864.61	2.74013	0.325161	8.427	3.54646e-17	3.18397e-16
ENSG00000177508	IRX3	179.537	4.39345	0.521993	8.41668	3.873e-17	3.46525e-16
ENSG00000171517	LPAR3	20.7602	5.65543	0.672565	8.40875	4.14392e-17	3.70075e-16
ENSG00000171345	KRT19	1691.81	-2.91407	0.34684	-8.40177	4.39802e-17	3.92039e-16
ENSG00000229373	LINC00452	19.8817	4.91699	0.586148	8.38865	4.91753e-17	4.36592e-16
ENSG00000068976	PYGM	36.5476	3.60939	0.430313	8.38783	4.95197e-17	4.39514e-16
ENSG00000162692	VCAM1	2491.36	-2.86804	0.342295	-8.37883	5.34564e-17	4.73142e-16
ENSG00000148488	ST8SIA6	14.595	-4.68242	0.55886	-8.37852	5.35956e-17	4.74229e-16
ENSG00000100626	GALNT16	120.928	2.70985	0.323837	8.36795	5.86276e-17	5.17799e-16
ENSG00000160161	CILP2	30.3495	3.98865	0.476804	8.36538	5.99214e-17	5.2874e-16
ENSG00000170571	EMB	1342.98	4.47543	0.535561	8.35652	6.45929e-17	5.68915e-16
ENSG00000224596	ZMIZ1-AS1	30.4829	3.1917	0.382121	8.35259	6.67848e-17	5.87502e-16
ENSG00000204219	TCEA3	76.4545	2.72283	0.326421	8.34148	7.33634e-17	6.43998e-16
ENSG00000106809	OGN	27.542	5.44788	0.653174	8.34062	7.39036e-17	6.48345e-16
ENSG00000166394	CYB5R2	824.757	2.21103	0.265599	8.32468	8.45536e-17	7.38179e-16
ENSG00000157445	CACNA2D3	35.5175	6.37509	0.766258	8.31977	8.81332e-17	7.68498e-16
ENSG00000168427	KLHL30	28.8208	6.47843	0.779032	8.316	9.09855e-17	7.9265e-16
ENSG00000157782	CABP1	83.5967	4.33982	0.522062	8.31284	9.34405e-17	8.13054e-16
ENSG00000198336	MYL4	25.6923	-2.23277	0.268821	-8.30579	9.91553e-17	8.61999e-16
ENSG00000080644	CHRNA3	20.6252	-2.62282	0.316203	-8.29471	1.0885e-16	9.44857e-16
ENSG00000086205	FOLH1	15.9955	-5.87585	0.709353	-8.28339	1.19715e-16	1.03667e-15
ENSG00000013293	SLC7A14	20.3253	-3.8754	0.46803	-8.28024	1.22923e-16	1.06381e-15
ENSG00000069535	MAOB	14.1973	6.47756	0.784308	8.25895	1.46955e-16	1.26722e-15
ENSG00000138193	PLCE1	17.8043	3.22955	0.39112	8.25718	1.49149e-16	1.28576e-15
ENSG00000112297	AIM1	861.627	-2.63895	0.319692	-8.25467	1.52319e-16	1.31229e-15
ENSG00000103742	IGDCC4	61.7894	2.66318	0.322796	8.25034	1.57941e-16	1.3591e-15
ENSG00000130176	CNN1	1724.55	4.38979	0.532714	8.24043	1.71598e-16	1.47399e-15
ENSG00000157404	KIT	92.2008	-4.20012	0.509879	-8.23747	1.75887e-16	1.51038e-15
ENSG00000132623	ANKEF1	269.064	-2.23812	0.271804	-8.23432	1.80577e-16	1.54742e-15
ENSG00000196557	CACNA1H	27.0463	5.68028	0.690241	8.22942	1.88129e-16	1.60974e-15
ENSG00000217791	ASS1P9	64.6237	3.80906	0.462874	8.22915	1.88544e-16	1.61222e-15
ENSG00000141837	CACNA1A	250.827	2.81966	0.343471	8.20932	2.22452e-16	1.89386e-15
ENSG00000154153	FAM134B	15.7067	3.8851	0.474071	8.19519	2.50188e-16	2.1231e-15
ENSG00000206820	RNU1-138P	5.09103	5.22054	0.637522	8.1888	2.63835e-16	2.2343e-15
ENSG00000003249	DBNDD1	3015.86	-2.31116	0.2824	-8.18401	2.74543e-16	2.32293e-15
ENSG00000223656	HMGB3P10	11.5912	-4.0154	0.49074	-8.18234	2.78381e-16	2.35402e-15
ENSG00000226510	UPK1A-AS1	11.7614	4.73642	0.578866	8.18224	2.78619e-16	2.35535e-15
ENSG00000196188	CTSE	11.612	-3.59616	0.439541	-8.18161	2.80072e-16	2.36694e-15
ENSG00000180777	ANKRD30B	34.1035	4.78455	0.585128	8.17693	2.91171e-16	2.45857e-15
ENSG00000144063	MALL	2290.46	-3.10961	0.380747	-8.16711	3.15854e-16	2.65841e-15
ENSG00000106278	PTPRZ1	73.8042	6.30492	0.772326	8.16355	3.25322e-16	2.73651e-15
ENSG00000155980	KIF5A	28.3075	3.60815	0.442568	8.15277	3.55668e-16	2.98566e-15
ENSG00000213244	HIST2H3DP1	21.1435	2.00172	0.245528	8.15274	3.55774e-16	2.98568e-15
ENSG00000198099	ADH4	20.1759	4.13267	0.506931	8.15233	3.56993e-16	2.99504e-15
ENSG00000135636	DYSF	6634.45	-2.88548	0.35399	-8.15129	3.60058e-16	3.01812e-15
ENSG00000184408	KCND2	28.0839	6.04305	0.741531	8.14942	3.65687e-16	3.06441e-15
ENSG00000134317	GRHL1	69.419	-2.03922	0.250429	-8.14292	3.85859e-16	3.22595e-15
ENSG00000122592	HOXA7	47.1592	-5.13137	0.630697	-8.13604	4.08433e-16	3.40479e-15
ENSG00000143512	HHIPL2	14.2577	3.92033	0.482113	8.13157	4.23748e-16	3.53042e-15
ENSG00000184524	CEND1	70.3839	2.12324	0.261157	8.13015	4.28748e-16	3.57104e-15
ENSG00000204482	LST1	37.0676	-2.55029	0.314036	-8.12101	4.62323e-16	3.84069e-15
ENSG00000162723	SLAMF9	16.7929	5.70287	0.702465	8.11837	4.72483e-16	3.92057e-15
ENSG00000117707	PROX1	292.258	-3.14435	0.387592	-8.11252	4.95802e-16	4.10461e-15
ENSG00000145703	IQGAP2	277.911	-2.29634	0.283311	-8.10536	5.2588e-16	4.34988e-15
ENSG00000185433	LINC00158	6.89148	5.13371	0.634179	8.09504	5.72439e-16	4.72278e-15
ENSG00000002079	MYH16	35.89	-3.07559	0.38004	-8.0928	5.831e-16	4.80799e-15
ENSG00000028137	TNFRSF1B	1941.58	-3.14061	0.388173	-8.09076	5.92926e-16	4.88202e-15
ENSG00000130045	NXNL2	15.7105	4.01804	0.497307	8.0796	6.49814e-16	5.33062e-15
ENSG00000172031	EPHX4	25.6526	-3.91698	0.484846	-8.0788	6.54056e-16	5.36236e-15
ENSG00000114638	UPK1B	15.8311	4.95723	0.614056	8.07294	6.86267e-16	5.62326e-15
ENSG00000170153	RNF150	147.631	2.58424	0.320162	8.07167	6.93403e-16	5.6785e-15
ENSG00000151490	PTPRO	17.8302	5.68762	0.704907	8.06861	7.11026e-16	5.81785e-15
ENSG00000105664	COMP	98.6207	4.9389	0.612157	8.06803	7.14394e-16	5.84375e-15
ENSG00000150636	CCDC102B	278.746	2.03354	0.252196	8.06333	7.42435e-16	6.06796e-15
ENSG00000138792	ENPEP	19.8901	4.59757	0.570482	8.0591	7.68607e-16	6.27296e-15
ENSG00000030304	MUSK	12.9015	4.05627	0.503615	8.05431	7.9929e-16	6.516e-15
ENSG00000102554	KLF5	445.631	2.15309	0.268228	8.02708	9.9822e-16	8.09649e-15
ENSG00000223547	ZNF844	421.264	2.17795	0.271583	8.01946	1.06212e-15	8.60264e-15
ENSG00000078081	LAMP3	946.838	-3.35885	0.419044	-8.01549	1.09702e-15	8.86787e-15
ENSG00000018236	CNTN1	152.66	4.06933	0.507701	8.01521	1.09951e-15	8.88555e-15
ENSG00000166278	C2	89.7779	2.29118	0.286146	8.00705	1.17494e-15	9.48177e-15
ENSG00000145362	ANK2	718.206	3.4098	0.425947	8.0052	1.19268e-15	9.60881e-15
ENSG00000111058	ACSS3	96.7648	3.88931	0.485933	8.00381	1.2063e-15	9.71585e-15
ENSG00000206552	KRBOX1-AS1	23.9402	4.33878	0.544457	7.96901	1.59955e-15	1.27477e-14
ENSG00000111348	ARHGDIB	23833.4	-2.29113	0.287599	-7.9664	1.63368e-15	1.30054e-14
ENSG00000226979	LTA	10.1957	-3.19298	0.400843	-7.96567	1.64336e-15	1.30751e-14
ENSG00000109794	FAM149A	61.2338	2.29453	0.288184	7.96204	1.69229e-15	1.34496e-14
ENSG00000120262	CCDC170	156.872	2.14672	0.269969	7.95174	1.83914e-15	1.45926e-14
ENSG00000128965	CHAC1	819.612	2.52377	0.317452	7.95009	1.86369e-15	1.47792e-14
ENSG00000196616	ADH1B	814.195	8.52329	1.07223	7.94914	1.87804e-15	1.48849e-14
ENSG00000080031	PTPRH	162.816	2.46502	0.310219	7.94604	1.92567e-15	1.52497e-14
ENSG00000139055	ERP27	29.2247	-2.60247	0.327581	-7.94451	1.94961e-15	1.54309e-14
ENSG00000133424	LARGE1	601.411	2.12059	0.267144	7.93801	2.05456e-15	1.62365e-14
ENSG00000123329	ARHGAP9	37.7941	3.41147	0.429786	7.9376	2.06139e-15	1.62843e-14
ENSG00000189292	FAM150B	17.7685	3.67876	0.463886	7.9303	2.18615e-15	1.72367e-14
ENSG00000152939	MARVELD2	207.238	-2.46879	0.311711	-7.92011	2.37293e-15	1.86583e-14
ENSG00000107099	DOCK8	230.071	-2.86256	0.361527	-7.91798	2.41404e-15	1.89609e-14
ENSG00000175003	SLC22A1	5.43638	4.4334	0.560226	7.91359	2.50077e-15	1.9626e-14
ENSG00000129173	E2F8	260.112	-2.85895	0.362181	-7.8937	2.93351e-15	2.28541e-14
ENSG00000116852	KIF21B	24.5494	-3.13548	0.397442	-7.88913	3.04301e-15	2.36688e-14
ENSG00000178162	FAR2P2	111.296	-2.62749	0.33321	-7.8854	3.13532e-15	2.43671e-14
ENSG00000104490	NCALD	27.193	4.45963	0.565695	7.88346	3.1843e-15	2.47277e-14
ENSG00000171246	NPTX1	135.063	3.30629	0.420238	7.86766	3.61337e-15	2.79316e-14
ENSG00000158458	NRG2	37.3028	-3.77558	0.480084	-7.86441	3.70832e-15	2.86579e-14
ENSG00000151025	GPR158	42.7782	5.27186	0.672011	7.84491	4.33258e-15	3.33213e-14
ENSG00000104722	NEFM	562.934	3.01431	0.384307	7.84351	4.38124e-15	3.36776e-14
ENSG00000133101	CCNA1	464.071	-3.03181	0.386959	-7.83497	4.68941e-15	3.59313e-14
ENSG00000185275	CD24P4	175.061	4.34058	0.555301	7.81662	5.42601e-15	4.14102e-14
ENSG00000140678	ITGAX	88.7318	-3.02464	0.386962	-7.81637	5.4367e-15	4.14807e-14
ENSG00000179630	LACC1	997.076	2.02499	0.259081	7.81604	5.45127e-15	4.15809e-14
ENSG00000130528	HRC	17.5497	5.47765	0.701972	7.80324	6.03379e-15	4.59391e-14
ENSG00000164659	KIAA1324L	3226.57	-2.89253	0.37088	-7.79909	6.23576e-15	4.74267e-14
ENSG00000084674	APOB	9.88133	-5.67452	0.728458	-7.78978	6.7127e-15	5.09599e-14
ENSG00000030419	IKZF2	221.858	2.45947	0.315748	7.78936	6.73515e-15	5.11106e-14
ENSG00000066405	CLDN18	14.8349	2.04829	0.263042	7.78693	6.86548e-15	5.20786e-14
ENSG00000182508	LHFPL1	14.2029	3.76706	0.483839	7.78578	6.92866e-15	5.25302e-14
ENSG00000164509	IL31RA	47.5584	-3.22769	0.414583	-7.78538	6.95064e-15	5.2683e-14
ENSG00000133107	TRPC4	523.82	4.30969	0.553951	7.77991	7.25751e-15	5.48933e-14
ENSG00000079385	CEACAM1	769.273	-3.13387	0.403154	-7.7734	7.64098e-15	5.76576e-14
ENSG00000094963	FMO2	103.6	7.37614	0.949839	7.76567	8.12153e-15	6.11556e-14
ENSG00000112294	ALDH5A1	61.2315	2.11949	0.273025	7.76298	8.29541e-15	6.24323e-14
ENSG00000178662	CSRNP3	23.7955	4.76188	0.613452	7.76243	8.33178e-15	6.26732e-14
ENSG00000153531	ADPRHL1	18.025	2.15596	0.277823	7.7602	8.47944e-15	6.37174e-14
ENSG00000162711	NLRP3	20.2376	5.03408	0.649187	7.75443	8.87386e-15	6.65597e-14
ENSG00000159217	IGF2BP1	307.239	-2.81792	0.363665	-7.74867	9.28579e-15	6.95951e-14
ENSG00000215808	LINC01139	10.3497	5.70821	0.737291	7.74213	9.7764e-15	7.3082e-14
ENSG00000090539	CHRD	78.1869	2.77463	0.358865	7.73168	1.06138e-14	7.91568e-14
ENSG00000118946	PCDH17	453.194	-3.64721	0.471824	-7.73003	1.07519e-14	8.01251e-14
ENSG00000143341	HMCN1	6617.64	2.31343	0.299373	7.72757	1.09615e-14	8.16446e-14
ENSG00000169744	LDB2	4985.15	-2.96263	0.383507	-7.7251	1.11769e-14	8.3206e-14
ENSG00000112182	BACH2	8.85813	-4.54011	0.5879	-7.72259	1.13986e-14	8.48125e-14
ENSG00000115468	EFHD1	135.519	4.34873	0.563632	7.71554	1.20472e-14	8.94076e-14
ENSG00000113805	CNTN3	283.858	5.21383	0.676143	7.71114	1.24694e-14	9.24693e-14
ENSG00000071282	LMCD1	1721.78	2.12061	0.27525	7.70431	1.31555e-14	9.73321e-14
ENSG00000163749	CCDC158	19.8698	3.08219	0.400079	7.70394	1.31937e-14	9.75849e-14
ENSG00000182578	CSF1R	10.9072	3.81352	0.495054	7.70323	1.32669e-14	9.80803e-14
ENSG00000197506	SLC28A3	8.26032	4.76182	0.618999	7.69277	1.43981e-14	1.06253e-13
ENSG00000174640	SLCO2A1	489.394	-5.22989	0.680437	-7.68607	1.51722e-14	1.11736e-13
ENSG00000122121	XPNPEP2	14.9585	6.66062	0.866928	7.68301	1.55389e-14	1.14407e-13
ENSG00000141431	ASXL3	19.0004	-3.68703	0.481278	-7.66092	1.84606e-14	1.3509e-13
ENSG00000026559	KCNG1	730.013	2.81413	0.367634	7.65472	1.93735e-14	1.41627e-13
ENSG00000226674	TEX41	10.5927	4.14398	0.541887	7.64731	2.0522e-14	1.49605e-13
ENSG00000086300	SNX10	17.0265	-3.5014	0.458005	-7.6449	2.09115e-14	1.52368e-13
ENSG00000115041	KCNIP3	55.6414	2.13234	0.279146	7.63881	2.19242e-14	1.59424e-13
ENSG00000106976	DNM1	263.231	2.89298	0.378881	7.63559	2.24794e-14	1.63255e-13
ENSG00000007174	DNAH9	11.8674	-4.08237	0.534754	-7.6341	2.27399e-14	1.65063e-13
ENSG00000132837	DMGDH	27.4371	2.787	0.365509	7.62497	2.44099e-14	1.76962e-13
ENSG00000140479	PCSK6	395.33	4.54823	0.596757	7.62157	2.506e-14	1.81447e-13
ENSG00000185862	EVI2B	480.245	-2.68533	0.352478	-7.61842	2.56792e-14	1.85744e-13
ENSG00000137869	CYP19A1	10.774	4.6708	0.613185	7.61728	2.59068e-14	1.87296e-13
ENSG00000140368	PSTPIP1	57.3924	2.6014	0.341794	7.61101	2.71965e-14	1.96275e-13
ENSG00000132185	FCRLA	95.7431	4.60531	0.605609	7.60442	2.86182e-14	2.06226e-13
ENSG00000196460	RFX8	147.191	3.05901	0.402564	7.59882	2.9884e-14	2.15186e-13
ENSG00000137090	DMRT1	6.74603	-5.0425	0.663624	-7.59843	2.99744e-14	2.15729e-13
ENSG00000142347	MYO1F	16.5756	2.82964	0.372874	7.58871	3.23094e-14	2.32186e-13
ENSG00000174672	BRSK2	14.6271	2.62127	0.345557	7.58564	3.30857e-14	2.37587e-13
ENSG00000154930	ACSS1	520.262	-2.53953	0.334878	-7.58345	3.36475e-14	2.41381e-13
ENSG00000170959	DCDC1	9.16468	2.8819	0.380232	7.57933	3.47334e-14	2.48922e-13
ENSG00000143502	SUSD4	6.39594	4.49024	0.593723	7.56285	3.94326e-14	2.81759e-13
ENSG00000117115	PADI2	26.0943	3.98348	0.526734	7.56259	3.95106e-14	2.82247e-13
ENSG00000184860	SDR42E1	56.9097	-2.42187	0.320254	-7.56234	3.95894e-14	2.8274e-13
ENSG00000196565	HBG2	17.0255	5.46601	0.722977	7.56042	4.01762e-14	2.86788e-13
ENSG00000170537	TMC7	351.704	-2.25209	0.298736	-7.53875	4.745e-14	3.3704e-13
ENSG00000173175	ADCY5	12.0558	2.27526	0.30182	7.53848	4.75485e-14	3.37573e-13
ENSG00000053524	MCF2L2	1473.03	-2.09366	0.277853	-7.53514	4.87805e-14	3.45979e-13
ENSG00000136826	KLF4	1313.07	2.433	0.323132	7.52943	5.0961e-14	3.60291e-13
ENSG00000204381	LAYN	1105.83	2.47573	0.328974	7.52562	5.2469e-14	3.70589e-13
ENSG00000220884	MESTP1	581.94	3.08202	0.410415	7.50953	5.93378e-14	4.17772e-13
ENSG00000132514	CLEC10A	6.16607	-4.93165	0.656776	-7.50888	5.96364e-14	4.19669e-13
ENSG00000198515	CNGA1	17.0144	3.01519	0.402925	7.48326	7.25023e-14	5.07727e-13
ENSG00000073910	FRY	1703.26	-2.42812	0.32454	-7.48171	7.33596e-14	5.13607e-13
ENSG00000106484	MEST	5042.08	3.05462	0.408589	7.47601	7.66155e-14	5.35676e-13
ENSG00000057294	PKP2	821.447	-2.45777	0.329272	-7.46424	8.37808e-14	5.8472e-13
ENSG00000167785	ZNF558	566.068	2.68917	0.3604	7.46161	8.54728e-14	5.95807e-13
ENSG00000111863	ADTRP	760.569	-2.15521	0.2891	-7.45491	8.99289e-14	6.25809e-13
ENSG00000211772	TRBC2	854	-5.28771	0.710077	-7.44667	9.57264e-14	6.65351e-13
ENSG00000167600	CYP2S1	476.374	2.60249	0.34958	7.44463	9.7218e-14	6.75392e-13
ENSG00000007312	CD79B	34.8717	-3.44398	0.462884	-7.44026	1.00484e-13	6.9741e-13
ENSG00000080573	COL5A3	30.6759	4.21245	0.566435	7.43678	1.03172e-13	7.15549e-13
ENSG00000180178	FAR2P1	5.29063	-4.97409	0.669445	-7.43018	1.08452e-13	7.50542e-13
ENSG00000178752	ERFE	204.291	2.19967	0.296383	7.4217	1.15624e-13	7.99793e-13
ENSG00000158104	HPD	15.2804	5.29093	0.713465	7.41582	1.20876e-13	8.34919e-13
ENSG00000123999	INHA	10.9696	2.96857	0.400331	7.4153	1.21351e-13	8.37793e-13
ENSG00000120885	CLU	7580.79	-2.08809	0.281629	-7.41433	1.22245e-13	8.43358e-13
ENSG00000225345	SNX18P3	101.934	-2.95685	0.39888	-7.41288	1.23583e-13	8.52385e-13
ENSG00000112559	MDFI	846.251	-3.82532	0.516065	-7.41248	1.23962e-13	8.54799e-13
ENSG00000111339	ART4	816.77	-2.53545	0.342433	-7.40422	1.31922e-13	9.0773e-13
ENSG00000138435	CHRNA1	58.2579	-4.27063	0.577212	-7.39872	1.37504e-13	9.44732e-13
ENSG00000198028	ZNF560	22.0702	4.24918	0.574698	7.39376	1.42731e-13	9.79532e-13
ENSG00000185565	LSAMP	53.3856	5.58221	0.75532	7.39052	1.46253e-13	1.00251e-12
ENSG00000124343	XG	837.71	3.38095	0.457615	7.3882	1.48832e-13	1.01922e-12
ENSG00000221947	XKR9	14.7456	2.29539	0.311533	7.36805	1.73144e-13	1.1815e-12
ENSG00000065534	MYLK	3314.43	2.30459	0.312946	7.36417	1.78251e-13	1.21491e-12
ENSG00000146859	TMEM140	45.2803	-2.67989	0.36402	-7.36193	1.81271e-13	1.23461e-12
ENSG00000153898	MCOLN2	34.1327	2.68002	0.364511	7.35236	1.94739e-13	1.32228e-12
ENSG00000183160	TMEM119	80.7183	7.475	1.01878	7.33719	2.18117e-13	1.4758e-12
ENSG00000225308	ASS1P11	44.5194	3.70139	0.504959	7.33007	2.30025e-13	1.55454e-12
ENSG00000112096	SOD2	50603.1	2.39536	0.326827	7.32912	2.31665e-13	1.5649e-12
ENSG00000047936	ROS1	13.0694	5.20302	0.710452	7.32354	2.41519e-13	1.6284e-12
ENSG00000128298	BAIAP2L2	74.3613	2.71338	0.370658	7.32043	2.4718e-13	1.66618e-12
ENSG00000147465	STAR	21.5992	2.83679	0.387636	7.31818	2.51366e-13	1.6936e-12
ENSG00000213030	CGB8	8.74548	3.41685	0.467201	7.31344	2.60381e-13	1.75066e-12
ENSG00000108576	SLC6A4	503.046	4.73827	0.648123	7.31076	2.65635e-13	1.78473e-12
ENSG00000110693	SOX6	144.233	2.74521	0.375544	7.30995	2.67249e-13	1.79516e-12
ENSG00000214076	CPSF1P1	23.2335	-2.8625	0.391767	-7.30664	2.73913e-13	1.83778e-12
ENSG00000158457	TSPAN33	65.3746	2.86005	0.391851	7.29882	2.90311e-13	1.94373e-12
ENSG00000115598	IL1RL2	32.0865	2.18832	0.299877	7.29737	2.93441e-13	1.96331e-12
ENSG00000041353	RAB27B	89.5708	3.79447	0.52007	7.29608	2.96281e-13	1.98047e-12
ENSG00000104081	BMF	24.2917	-2.73116	0.374529	-7.29224	3.04837e-13	2.03578e-12
ENSG00000109072	VTN	175.701	2.64368	0.363303	7.27678	3.41874e-13	2.27259e-12
ENSG00000213057	C1orf220	30.2317	2.35625	0.324008	7.2722	3.53684e-13	2.35001e-12
ENSG00000178776	C5orf46	1086.92	3.81867	0.525781	7.26285	3.79018e-13	2.51196e-12
ENSG00000155966	AFF2	171.846	3.4518	0.475336	7.26181	3.81939e-13	2.53016e-12
ENSG00000134775	FHOD3	1902.44	2.50499	0.345504	7.25025	4.16009e-13	2.75143e-12
ENSG00000012171	SEMA3B	253.801	2.49346	0.34393	7.24991	4.17039e-13	2.75761e-12
ENSG00000115590	IL1R2	18.844	3.87123	0.534041	7.24894	4.20049e-13	2.77624e-12
ENSG00000125637	PSD4	147.157	2.5542	0.352444	7.24713	4.25692e-13	2.81224e-12
ENSG00000133026	MYH10	54646.4	2.11825	0.292373	7.245	4.32424e-13	2.85475e-12
ENSG00000166897	ELFN2	6.27516	-4.56533	0.631374	-7.23079	4.80202e-13	3.16076e-12
ENSG00000205457	TP53TG3C	108.151	3.38603	0.468599	7.22586	4.97931e-13	3.26775e-12
ENSG00000064300	NGFR	12.1598	3.79791	0.526628	7.21175	5.52354e-13	3.6101e-12
ENSG00000156510	HKDC1	17.8363	3.11994	0.433081	7.20407	5.84392e-13	3.80913e-12
ENSG00000146013	GFRA3	11.7476	4.71951	0.655317	7.20186	5.93959e-13	3.87061e-12
ENSG00000154065	ANKRD29	183.529	2.6872	0.373309	7.19832	6.09611e-13	3.96812e-12
ENSG00000138759	FRAS1	1904.92	-2.67754	0.372161	-7.19459	6.26473e-13	4.07512e-12
ENSG00000166396	SERPINB7	13.0631	5.65348	0.786171	7.19115	6.42489e-13	4.17518e-12
ENSG00000215325	ASS1P10	38.2035	2.07498	0.288583	7.19021	6.4692e-13	4.20243e-12
ENSG00000155962	CLIC2	62.2845	-3.00815	0.418517	-7.18764	6.59201e-13	4.27835e-12
ENSG00000167895	TMC8	10.5892	-5.17714	0.720715	-7.18333	6.8032e-13	4.41044e-12
ENSG00000198483	ANKRD35	10.8178	-2.60291	0.362499	-7.18044	6.94857e-13	4.4976e-12
ENSG00000007237	GAS7	77.2346	4.27745	0.595769	7.17971	6.98577e-13	4.51863e-12
ENSG00000008197	TFAP2D	18.8705	6.48306	0.905001	7.1636	7.85847e-13	5.06153e-12
ENSG00000144644	GADL1	16.2843	-3.10404	0.433404	-7.16202	7.94982e-13	5.11923e-12
ENSG00000137266	SLC22A23	3352.49	2.21281	0.309026	7.16059	8.03302e-13	5.17165e-12
ENSG00000118785	SPP1	47.8795	4.52789	0.632727	7.15615	8.29753e-13	5.33003e-12
ENSG00000188404	SELL	140.878	-2.30285	0.322077	-7.14999	8.67813e-13	5.56707e-12
ENSG00000173200	PARP15	50.7476	-2.32671	0.325982	-7.13756	9.50036e-13	6.07424e-12
ENSG00000075213	SEMA3A	294.105	2.37702	0.333183	7.13428	9.72963e-13	6.21669e-12
ENSG00000161082	CELF5	6.85355	2.83367	0.397265	7.13294	9.82464e-13	6.27323e-12
ENSG00000165061	ZMAT4	18.5512	4.06182	0.569976	7.1263	1.03101e-12	6.56427e-12
ENSG00000102287	GABRE	2701.54	2.05106	0.288295	7.11445	1.12364e-12	7.13667e-12
ENSG00000092621	PHGDH	3904.71	2.0487	0.288652	7.09746	1.27069e-12	8.03525e-12
ENSG00000115232	ITGA4	4068.38	2.56865	0.362224	7.09133	1.32834e-12	8.38873e-12
ENSG00000136895	GARNL3	75.2358	-2.14357	0.302339	-7.08996	1.34151e-12	8.47005e-12
ENSG00000214402	LCNL1	19.9163	4.66408	0.659729	7.0697	1.55273e-12	9.73965e-12
ENSG00000105048	TNNT1	172.623	2.20278	0.311688	7.06725	1.58032e-12	9.9062e-12
ENSG00000065361	ERBB3	30.1011	2.78088	0.393715	7.0632	1.62716e-12	1.01888e-11
ENSG00000137673	MMP7	24.4987	-5.03707	0.714017	-7.05455	1.73166e-12	1.08149e-11
ENSG00000132693	CRP	4.54371	-4.98158	0.707027	-7.04582	1.84378e-12	1.14827e-11
ENSG00000136999	NOV	10.7735	5.04484	0.716269	7.04322	1.87849e-12	1.16913e-11
ENSG00000131730	CKMT2	32.1363	2.67514	0.380216	7.03585	1.98056e-12	1.23027e-11
ENSG00000223839	FAM95B1	163.05	-2.37141	0.337736	-7.0215	2.19494e-12	1.35904e-11
ENSG00000175697	GPR156	52.5368	2.01922	0.287584	7.02132	2.19787e-12	1.36027e-11
ENSG00000181195	PENK	52.8723	7.12032	1.01524	7.01345	2.32515e-12	1.43535e-11
ENSG00000114115	RBP1	382.957	3.05848	0.436581	7.00552	2.46069e-12	1.51415e-11
ENSG00000136541	ERMN	17.8911	6.28281	0.896863	7.00532	2.46421e-12	1.51599e-11
ENSG00000180071	ANKRD18A	132.126	-2.57233	0.367721	-6.99533	2.64637e-12	1.62563e-11
ENSG00000165810	BTNL9	10.9899	-3.48192	0.49792	-6.99293	2.69203e-12	1.65297e-11
ENSG00000005471	ABCB4	23.3691	-3.12015	0.446973	-6.98062	2.93873e-12	1.79794e-11
ENSG00000199161	MIR126	5.60956	-4.36471	0.625803	-6.97458	3.06779e-12	1.8753e-11
ENSG00000078018	MAP2	2102.98	-2.12899	0.30536	-6.97208	3.12299e-12	1.90824e-11
ENSG00000185432	METTL7A	614.298	-2.48615	0.356839	-6.96714	3.23443e-12	1.97256e-11
ENSG00000183632	TP53TG3	55.4873	3.29849	0.473695	6.96332	3.3235e-12	2.02474e-11
ENSG00000077420	APBB1IP	18.635	4.60992	0.662262	6.96087	3.3818e-12	2.05808e-11
ENSG00000073849	ST6GAL1	8688.59	-2.07944	0.298783	-6.95969	3.41018e-12	2.07448e-11
ENSG00000122877	EGR2	18.2531	4.40124	0.632602	6.95737	3.4669e-12	2.1072e-11
ENSG00000131831	RAI2	16.0201	-3.89485	0.561161	-6.94069	3.90181e-12	2.36357e-11
ENSG00000166206	GABRB3	54.6739	3.50105	0.504786	6.93571	4.0418e-12	2.44528e-11
ENSG00000175183	CSRP2	940.468	2.44195	0.352185	6.93371	4.09951e-12	2.47811e-11
ENSG00000185739	SRL	8.8154	-3.38114	0.488127	-6.92676	4.306e-12	2.60075e-11
ENSG00000224309	ANKRD30BP2	4.12124	-4.3667	0.630944	-6.9209	4.48771e-12	2.70653e-11
ENSG00000108342	CSF3	5017.59	4.39904	0.636038	6.91631	4.63568e-12	2.79285e-11
ENSG00000184254	ALDH1A3	28058.5	2.12465	0.307387	6.91199	4.77895e-12	2.87496e-11
ENSG00000135373	EHF	12.412	6.10337	0.883346	6.90938	4.86784e-12	2.92721e-11
ENSG00000163739	CXCL1	20512.4	2.90417	0.420458	6.90716	4.9445e-12	2.97206e-11
ENSG00000069122	ADGRF5	3199.96	-4.14156	0.600085	-6.90162	5.14113e-12	3.08639e-11
ENSG00000078114	NEBL	62.6335	-2.85443	0.413755	-6.89884	5.24272e-12	3.14673e-11
ENSG00000145113	MUC4	19.1977	-2.17459	0.315269	-6.89757	5.29009e-12	3.1745e-11
ENSG00000163145	C1QTNF7	5.61154	5.13104	0.743938	6.89713	5.3063e-12	3.18356e-11
ENSG00000142623	PADI1	58.5799	4.5934	0.665997	6.89703	5.31012e-12	3.18519e-11
ENSG00000104368	PLAT	36258.5	2.3158	0.335786	6.89666	5.32407e-12	3.19289e-11
ENSG00000128652	HOXD3	26.6	-4.23182	0.614512	-6.88647	5.71939e-12	3.42e-11
ENSG00000161381	PLXDC1	9.43354	3.66461	0.532991	6.87557	6.17446e-12	3.67938e-11
ENSG00000048540	LMO3	32.9951	2.31253	0.336403	6.87428	6.23029e-12	3.71163e-11
ENSG00000111907	TPD52L1	508.752	2.51151	0.365441	6.87253	6.30717e-12	3.75588e-11
ENSG00000152779	SLC16A12	108.988	3.54116	0.515428	6.87033	6.40555e-12	3.81132e-11
ENSG00000172014	ANKRD20A4	38.2693	-2.32991	0.339141	-6.87004	6.41818e-12	3.81804e-11
ENSG00000127252	HRASLS	21.7743	-3.22317	0.471332	-6.83843	8.00658e-12	4.7346e-11
ENSG00000115919	KYNU	69.8961	3.76423	0.550584	6.8368	8.098e-12	4.78571e-11
ENSG00000162366	PDZK1IP1	61.5547	3.08127	0.450777	6.83547	8.17365e-12	4.82844e-11
ENSG00000170954	ZNF415	278.021	2.41326	0.353248	6.83162	8.39594e-12	4.95569e-11
ENSG00000025423	HSD17B6	32.1156	3.46857	0.507818	6.83034	8.47115e-12	4.99906e-11
ENSG00000156218	ADAMTSL3	97.2691	3.23034	0.473647	6.82015	9.09447e-12	5.35592e-11
ENSG00000077943	ITGA8	32.3789	4.99111	0.731984	6.81861	9.19286e-12	5.41055e-11
ENSG00000162913	C1orf145	7.77009	3.60826	0.529335	6.8166	9.3222e-12	5.48331e-11
ENSG00000163435	ELF3	31.1265	4.50007	0.660205	6.81618	9.34955e-12	5.49828e-11
ENSG00000149403	GRIK4	9.56238	-3.62731	0.5324	-6.81313	9.54999e-12	5.60928e-11
ENSG00000123405	NFE2	11.7716	5.14426	0.75518	6.81197	9.62743e-12	5.65131e-11
ENSG00000188385	JAKMIP3	20.2829	2.16722	0.318307	6.80859	9.85576e-12	5.7724e-11
ENSG00000151136	BTBD11	421.669	2.60121	0.382106	6.80755	9.92783e-12	5.81225e-11
ENSG00000132563	REEP2	288.844	2.01633	0.296656	6.79685	1.06928e-11	6.24485e-11
ENSG00000168314	MOBP	21.0158	-3.22652	0.474953	-6.79334	1.09563e-11	6.39361e-11
ENSG00000165084	C8orf34	9.84726	4.94987	0.728713	6.79262	1.10115e-11	6.42322e-11
ENSG00000043462	LCP2	12.0909	-5.97583	0.87979	-6.79234	1.1033e-11	6.43444e-11
ENSG00000197461	PDGFA	1255.44	-2.18819	0.322508	-6.78492	1.16147e-11	6.75318e-11
ENSG00000223760	MED15P9	10.8694	2.24192	0.330497	6.78346	1.17332e-11	6.81795e-11
ENSG00000146950	SHROOM2	520.409	-3.67487	0.54235	-6.77583	1.23695e-11	7.17178e-11
ENSG00000187908	DMBT1	18.5804	4.02706	0.594343	6.77566	1.23842e-11	7.1774e-11
ENSG00000112936	C7	80.6894	5.84011	0.861984	6.77519	1.24242e-11	7.19914e-11
ENSG00000006210	CX3CL1	827.915	-3.93136	0.580343	-6.77419	1.25103e-11	7.24758e-11
ENSG00000116183	PAPPA2	42.3753	3.5127	0.519128	6.76653	1.31906e-11	7.62021e-11
ENSG00000150510	FAM124A	16.783	-2.19774	0.32529	-6.75623	1.41626e-11	8.15724e-11
ENSG00000224106	CYP4F25P	24.2603	-2.77778	0.411707	-6.74696	1.5097e-11	8.67114e-11
ENSG00000007933	FMO3	13.1092	6.0911	0.904209	6.73638	1.6238e-11	9.2987e-11
ENSG00000039068	CDH1	21.797	4.7217	0.701031	6.73536	1.63524e-11	9.36232e-11
ENSG00000144339	TMEFF2	29.6656	3.22485	0.479102	6.73104	1.68453e-11	9.63307e-11
ENSG00000189056	RELN	4438.48	-2.61905	0.389434	-6.72527	1.75266e-11	1.00107e-10
ENSG00000150637	CD226	25.6843	3.04994	0.45362	6.72356	1.77335e-11	1.01249e-10
ENSG00000206172	HBA1	10.1592	4.66276	0.694247	6.71628	1.86426e-11	1.06292e-10
ENSG00000213468	FIRRE	54.802	-2.00754	0.299114	-6.71162	1.92478e-11	1.09569e-10
ENSG00000132182	NUP210	33.5118	-4.44785	0.663458	-6.70403	2.02747e-11	1.15165e-10
ENSG00000100276	RASL10A	10.0772	-2.21175	0.330293	-6.69632	2.13729e-11	1.21187e-10
ENSG00000140093	SERPINA10	9.49627	5.84284	0.872674	6.69533	2.15186e-11	1.21965e-10
ENSG00000188452	CERKL	25.2724	2.8524	0.42658	6.68666	2.28321e-11	1.29182e-10
ENSG00000173376	NDNF	21.5122	4.92797	0.73735	6.68334	2.33552e-11	1.3196e-10
ENSG00000197291	RAMP2-AS1	110.76	-2.0951	0.314507	-6.66155	2.70963e-11	1.5241e-10
ENSG00000132938	MTUS2	6.84928	5.13661	0.774068	6.63587	3.22594e-11	1.8043e-10
ENSG00000127863	TNFRSF19	43.4359	2.87126	0.432871	6.63306	3.28807e-11	1.83762e-10
ENSG00000154553	PDLIM3	8994.74	2.63677	0.397996	6.62511	3.47e-11	1.93479e-10
ENSG00000198286	CARD11	862.944	-3.68625	0.556433	-6.62478	3.47757e-11	1.93826e-10
ENSG00000073734	ABCB11	15.8826	-3.54063	0.53541	-6.61293	3.76774e-11	2.09472e-10
ENSG00000092607	TBX15	329.99	4.40324	0.666433	6.60718	3.9171e-11	2.17483e-10
ENSG00000153064	BANK1	65.0134	2.52613	0.38267	6.60133	4.07476e-11	2.25888e-10
ENSG00000159648	TEPP	23.3881	-2.57583	0.390238	-6.60066	4.09337e-11	2.26832e-10
ENSG00000166831	RBPMS2	62.2037	-2.90947	0.441454	-6.59065	4.37915e-11	2.41877e-10
ENSG00000091129	NRCAM	21028.2	-2.12863	0.323034	-6.58949	4.4134e-11	2.43723e-10
ENSG00000196549	MME	1955.08	2.77531	0.421583	6.58306	4.60878e-11	2.54025e-10
ENSG00000160862	AZGP1	13.0385	4.49071	0.683591	6.56929	5.05548e-11	2.77584e-10
ENSG00000069482	GAL	5.45171	-4.50299	0.686173	-6.56247	5.29234e-11	2.90092e-10
ENSG00000207617	MIR3074	8.4475	2.43727	0.371542	6.55989	5.38492e-11	2.94886e-10
ENSG00000146530	VWDE	45.2195	-2.7594	0.420711	-6.55889	5.42108e-11	2.96753e-10
ENSG00000164112	TMEM155	200.419	2.37052	0.362173	6.54526	5.93909e-11	3.23878e-10
ENSG00000203808	BVES-AS1	6.92181	3.98362	0.609298	6.53804	6.23295e-11	3.39198e-10
ENSG00000116141	MARK1	245.883	-3.16231	0.483718	-6.53749	6.25581e-11	3.40378e-10
ENSG00000218014	KRT19P1	28.9628	-3.28746	0.503278	-6.5321	6.48521e-11	3.52393e-10
ENSG00000167780	SOAT2	4.70171	4.46494	0.683768	6.5299	6.58134e-11	3.57414e-10
ENSG00000114654	EFCC1	9.4906	-4.54122	0.695956	-6.52515	6.79346e-11	3.68448e-10
ENSG00000148655	C10orf11	163.701	-2.57785	0.39542	-6.51927	7.06516e-11	3.82392e-10
ENSG00000105219	CNTD2	7.13853	2.61678	0.401838	6.51201	7.41501e-11	4.00875e-10
ENSG00000197181	PIWIL2	31.6222	5.19411	0.798913	6.50148	7.95361e-11	4.28867e-10
ENSG00000214518	KRTAP2-2	10.3853	4.8178	0.741795	6.49478	8.31528e-11	4.4728e-10
ENSG00000126861	OMG	69.7576	-2.52056	0.388533	-6.48738	8.73395e-11	4.69012e-10
ENSG00000150337	FCGR1A	5.04587	4.95085	0.763861	6.48135	9.09076e-11	4.87627e-10
ENSG00000223949	ROR1-AS1	24.2097	3.33088	0.514674	6.47182	9.68303e-11	5.18239e-10
ENSG00000183242	WT1-AS	150.35	3.4001	0.525834	6.4661	1.00561e-10	5.37608e-10
ENSG00000140519	RHCG	12.2282	3.98392	0.616183	6.46549	1.0097e-10	5.39593e-10
ENSG00000188536	HBA2	11.9664	4.58519	0.709958	6.4584	1.05819e-10	5.64353e-10
ENSG00000182545	RNASE10	16.8639	-2.21606	0.344556	-6.43162	1.26254e-10	6.68638e-10
ENSG00000070159	PTPN3	183.315	3.0085	0.46796	6.42896	1.28479e-10	6.79918e-10
ENSG00000122188	LAX1	5.71259	-2.47855	0.385599	-6.42779	1.29475e-10	6.8488e-10
ENSG00000066248	NGEF	161.41	2.49944	0.388855	6.42768	1.2957e-10	6.85188e-10
ENSG00000162687	KCNT2	435.57	2.61683	0.408231	6.41017	1.4536e-10	7.65878e-10
ENSG00000215112	FAM74A1	6.48068	-4.90128	0.764734	-6.40912	1.4636e-10	7.70724e-10
ENSG00000207864	MIR27B	9.5909	2.64385	0.413307	6.39681	1.58652e-10	8.32711e-10
ENSG00000169851	PCDH7	2114.13	-2.61844	0.410021	-6.38612	1.70149e-10	8.89172e-10
ENSG00000169418	NPR1	128.972	-3.01762	0.473515	-6.3728	1.85607e-10	9.67491e-10
ENSG00000183638	RP1L1	3.20099	-4.5806	0.719247	-6.36861	1.90743e-10	9.9265e-10
ENSG00000140470	ADAMTS17	53.7419	2.89042	0.454438	6.36044	2.0118e-10	1.04508e-09
ENSG00000083454	P2RX5	166.294	2.02769	0.320656	6.32356	2.5561e-10	1.31784e-09
ENSG00000145700	ANKRD31	7.1076	2.54249	0.402132	6.32252	2.57332e-10	1.32601e-09
ENSG00000146374	RSPO3	234.828	-2.23897	0.354394	-6.31775	2.65396e-10	1.36537e-09
ENSG00000178568	ERBB4	39.9231	2.48733	0.393878	6.31498	2.70197e-10	1.38957e-09
ENSG00000172159	FRMD3	176.864	-2.28191	0.361953	-6.30443	2.8925e-10	1.48306e-09
ENSG00000112499	SLC22A2	5.1801	5.08974	0.807895	6.3	2.97644e-10	1.52365e-09
ENSG00000174502	SLC26A9	14.1576	-2.81001	0.446328	-6.29585	3.05721e-10	1.56361e-09
ENSG00000140015	KCNH5	7.84855	4.56611	0.72555	6.29331	3.10772e-10	1.58832e-09
ENSG00000167693	NXN	1866.36	-2.48303	0.394867	-6.28827	3.21032e-10	1.63686e-09
ENSG00000183169	POM121L1P	11.7938	3.13759	0.499101	6.28648	3.24738e-10	1.655e-09
ENSG00000224520	KRT8P45	117.551	2.69998	0.430374	6.27356	3.52896e-10	1.79185e-09
ENSG00000096696	DSP	145.73	4.11189	0.655448	6.27341	3.53235e-10	1.79262e-09
ENSG00000177614	PGBD5	24.1754	3.71267	0.591875	6.27272	3.54804e-10	1.79963e-09
ENSG00000204291	COL15A1	176.487	4.47626	0.715483	6.25627	3.94291e-10	1.99255e-09
ENSG00000227644	HIGD1AP11	21.7175	3.55175	0.568393	6.24876	4.1372e-10	2.08707e-09
ENSG00000102032	RENBP	68.568	-2.44335	0.391111	-6.24721	4.17858e-10	2.1062e-09
ENSG00000169126	ARMC4	81.3526	-4.1101	0.658102	-6.24539	4.22743e-10	2.12961e-09
ENSG00000167755	KLK6	9.54073	-4.49872	0.72079	-6.24137	4.33745e-10	2.18389e-09
ENSG00000221340	RNU6ATAC18P	6.4145	3.2902	0.527437	6.23809	4.42948e-10	2.22827e-09
ENSG00000180525	PRR26	48.3178	-3.33048	0.534408	-6.23208	4.60269e-10	2.31137e-09
ENSG00000173227	SYT12	6.10283	4.33967	0.696397	6.2316	4.61692e-10	2.31771e-09
ENSG00000121207	LRAT	13.2191	3.76296	0.604123	6.22879	4.70053e-10	2.3564e-09
ENSG00000215533	LINC00189	5.90072	4.47569	0.719569	6.21996	4.97276e-10	2.48681e-09
ENSG00000131471	AOC3	14.8482	3.10778	0.499901	6.21679	5.07432e-10	2.53584e-09
ENSG00000123500	COL10A1	18.7219	3.99639	0.643093	6.21432	5.15478e-10	2.57337e-09
ENSG00000135248	FAM71F1	8.94453	2.96938	0.477847	6.21408	5.16264e-10	2.57685e-09
ENSG00000196337	CGB7	44.751	2.14363	0.345183	6.21014	5.29384e-10	2.63731e-09
ENSG00000128567	PODXL	24662.1	-2.3091	0.372178	-6.20431	5.49379e-10	2.73314e-09
ENSG00000168243	GNG4	11.7205	3.88073	0.626825	6.19108	5.97518e-10	2.96087e-09
ENSG00000197826	C4orf22	25.966	2.27972	0.368262	6.1905	5.99733e-10	2.97082e-09
ENSG00000187957	DNER	19.9968	3.30894	0.534631	6.1892	6.04714e-10	2.99447e-09
ENSG00000212710	CTAGE1	9.39725	5.09061	0.823994	6.17797	6.49319e-10	3.20159e-09
ENSG00000183072	NKX2-5	11.8024	-5.14944	0.833633	-6.17711	6.52863e-10	3.21741e-09
ENSG00000200293	RNA5SP393	4.30392	-4.22085	0.683354	-6.17667	6.54662e-10	3.22517e-09
ENSG00000137819	PAQR5	16.2353	3.29882	0.53559	6.15922	7.31055e-10	3.58802e-09
ENSG00000188338	SLC38A3	3.28571	-3.59701	0.584233	-6.15681	7.42253e-10	3.64112e-09
ENSG00000212725	KRTAP2-1	8.28967	4.66749	0.759603	6.14464	8.01432e-10	3.91543e-09
ENSG00000229089	ANKRD20A8P	22.3256	-2.00387	0.326255	-6.14203	8.14727e-10	3.97701e-09
ENSG00000010671	BTK	12.8398	-3.20733	0.523904	-6.12198	9.24168e-10	4.49144e-09
ENSG00000164309	CMYA5	20.0167	2.37137	0.388216	6.10839	1.00644e-09	4.87811e-09
ENSG00000211574	MIR770	12.2242	2.19549	0.359654	6.10446	1.0315e-09	4.9954e-09
ENSG00000124143	ARHGAP40	15.8727	-3.2433	0.531337	-6.10403	1.03426e-09	5.00788e-09
ENSG00000127329	PTPRB	18599.9	-2.05959	0.337557	-6.10148	1.05092e-09	5.08414e-09
ENSG00000136574	GATA4	2121.89	3.94701	0.646903	6.10139	1.05153e-09	5.08553e-09
ENSG00000140297	GCNT3	5.37241	3.59054	0.589092	6.09504	1.09409e-09	5.28073e-09
ENSG00000092969	TGFB2	12046.1	2.20619	0.362252	6.09019	1.12777e-09	5.4342e-09
ENSG00000130762	ARHGEF16	76.3886	2.59036	0.425507	6.08771	1.1454e-09	5.5164e-09
ENSG00000152689	RASGRP3	651.291	-2.36038	0.388316	-6.0785	1.21311e-09	5.83273e-09
ENSG00000116785	CFHR3	53.8548	2.13083	0.350935	6.07185	1.26447e-09	6.0633e-09
ENSG00000106006	HOXA6	7.43873	-4.52888	0.745897	-6.07173	1.26541e-09	6.06598e-09
ENSG00000205456	TP53TG3D	75.0461	2.67018	0.440982	6.05509	1.40343e-09	6.70083e-09
ENSG00000224743	TEX26-AS1	35.4829	2.01807	0.333358	6.05376	1.41506e-09	6.75413e-09
ENSG00000130558	OLFM1	127.515	2.22249	0.367206	6.05244	1.42668e-09	6.80508e-09
ENSG00000100427	MLC1	26.6382	5.30405	0.877145	6.04695	1.47613e-09	7.03164e-09
ENSG00000142910	TINAGL1	28090	-2.03753	0.337054	-6.04511	1.49309e-09	7.10888e-09
ENSG00000110848	CD69	17.3158	-5.34924	0.886194	-6.03619	1.57795e-09	7.49682e-09
ENSG00000105929	ATP6V0A4	21.0684	-2.01663	0.334461	-6.02948	1.64487e-09	7.80191e-09
ENSG00000181126	HLA-V	36.2016	2.43523	0.404768	6.01635	1.78391e-09	8.43638e-09
ENSG00000141738	GRB7	11.7401	2.99574	0.498248	6.01254	1.82638e-09	8.63157e-09
ENSG00000124467	PSG8	24.8633	3.0738	0.511243	6.0124	1.82798e-09	8.63772e-09
ENSG00000137731	FXYD2	13.9017	-2.70944	0.451056	-6.00688	1.8913e-09	8.92812e-09
ENSG00000005102	MEOX1	22.733	4.76007	0.79275	6.0045	1.91919e-09	9.05091e-09
ENSG00000117266	CDK18	129.796	2.71677	0.452484	6.00413	1.92364e-09	9.07039e-09
ENSG00000223731	SUPT20HL1	8.75608	5.62976	0.937913	6.00243	1.94387e-09	9.15829e-09
ENSG00000118898	PPL	231.092	2.85143	0.476127	5.9888	2.11401e-09	9.9274e-09
ENSG00000160282	FTCD	9.746	2.71242	0.453125	5.98603	2.15027e-09	1.00862e-08
ENSG00000129990	SYT5	38.4335	2.25934	0.377478	5.98534	2.15933e-09	1.0127e-08
ENSG00000204872	NAT8B	3.75502	-4.6882	0.783764	-5.98165	2.20887e-09	1.03341e-08
ENSG00000177133	LINC00982	27.3911	5.04762	0.844623	5.97618	2.28433e-09	1.06837e-08
ENSG00000116031	CD207	7.26387	-3.10157	0.519001	-5.97603	2.28635e-09	1.06914e-08
ENSG00000184937	WT1	982.569	3.08292	0.515956	5.97516	2.29858e-09	1.07469e-08
ENSG00000143850	PLEKHA6	650.057	-2.67999	0.448718	-5.97254	2.33581e-09	1.09156e-08
ENSG00000201496	RN7SKP275	9.02941	-2.90075	0.485969	-5.969	2.38718e-09	1.1143e-08
ENSG00000132840	BHMT2	29.8579	2.70022	0.452988	5.96091	2.50836e-09	1.16878e-08
ENSG00000135333	EPHA7	19.7222	3.40243	0.570997	5.95875	2.54168e-09	1.18335e-08
ENSG00000184588	PDE4B	1784.28	-2.1988	0.369968	-5.94322	2.7948e-09	1.29596e-08
ENSG00000101188	NTSR1	167.063	-2.6438	0.445278	-5.93741	2.89555e-09	1.33923e-08
ENSG00000087237	CETP	81.9352	-2.64583	0.447127	-5.91741	3.27043e-09	1.50513e-08
ENSG00000198133	TMEM229B	4.01676	3.4444	0.582128	5.91691	3.28052e-09	1.50953e-08
ENSG00000167419	LPO	5.32894	3.89908	0.659045	5.91626	3.29336e-09	1.5152e-08
ENSG00000163121	NEURL3	14.6513	-3.91945	0.663044	-5.9113	3.3942e-09	1.5596e-08
ENSG00000171714	ANO5	8.90534	-3.98822	0.674883	-5.9095	3.43138e-09	1.57593e-08
ENSG00000095587	TLL2	15.8223	2.77273	0.469657	5.90373	3.55366e-09	1.62949e-08
ENSG00000213931	HBE1	26.0417	3.67979	0.623518	5.90167	3.59845e-09	1.6495e-08
ENSG00000055732	MCOLN3	6.62885	4.30109	0.729555	5.8955	3.7355e-09	1.71124e-08
ENSG00000124721	DNAH8	36.4689	-3.09697	0.525329	-5.8953	3.74011e-09	1.71281e-08
ENSG00000011347	SYT7	19.0572	3.03878	0.516979	5.87796	4.15366e-09	1.89346e-08
ENSG00000221826	PSG3	31.0764	3.57688	0.609629	5.86731	4.42915e-09	2.01522e-08
ENSG00000169302	STK32A	18.3052	2.99795	0.511057	5.86617	4.45967e-09	2.02879e-08
ENSG00000226037	LINC01040	10.4119	-3.98322	0.679094	-5.86549	4.47795e-09	2.03678e-08
ENSG00000162931	TRIM17	5.72511	2.41051	0.411108	5.86345	4.53355e-09	2.06174e-08
ENSG00000134201	GSTM5	78.9202	2.75858	0.471668	5.84856	4.95846e-09	2.24683e-08
ENSG00000000938	FGR	4.89013	-3.48682	0.596509	-5.84537	5.05435e-09	2.28776e-08
ENSG00000186479	RGS7BP	34.7357	-3.16494	0.541496	-5.84481	5.07143e-09	2.29477e-08
ENSG00000130035	GALNT8	9.13934	-5.23019	0.895802	-5.83855	5.26565e-09	2.37854e-08
ENSG00000062038	CDH3	14.3776	3.69349	0.632744	5.83726	5.30678e-09	2.39675e-08
ENSG00000134548	SPX	31.9341	2.33181	0.399816	5.83221	5.46993e-09	2.46888e-08
ENSG00000173083	HPSE	1097.66	-2.22959	0.382432	-5.83001	5.54229e-09	2.49998e-08
ENSG00000136383	ALPK3	231.556	-2.60913	0.447603	-5.82911	5.57242e-09	2.5116e-08
ENSG00000012223	LTF	461.966	4.64728	0.79924	5.81462	6.07715e-09	2.72757e-08
ENSG00000229017	LINC01277	6.242	3.20196	0.551442	5.80653	6.37826e-09	2.85737e-08
ENSG00000183668	PSG9	59.2961	2.60641	0.450244	5.78888	7.08593e-09	3.15819e-08
ENSG00000167641	PPP1R14A	410.476	2.76783	0.478647	5.78262	7.35451e-09	3.27334e-08
ENSG00000151692	RNF144A	47.4608	-2.39428	0.414273	-5.77949	7.49274e-09	3.33281e-08
ENSG00000142611	PRDM16	228.036	3.76275	0.651534	5.77521	7.68559e-09	3.41346e-08
ENSG00000089199	CHGB	24.2375	2.06705	0.358788	5.76122	8.35105e-09	3.69122e-08
ENSG00000089127	OAS1	687.232	-2.22319	0.387279	-5.74053	9.43832e-09	4.15586e-08
ENSG00000074966	TXK	60.5475	-2.4169	0.421098	-5.73952	9.49469e-09	4.17941e-08
ENSG00000140459	CYP11A1	40.3253	2.82987	0.493958	5.72897	1.01042e-08	4.43821e-08
ENSG00000147573	TRIM55	5.78122	4.71791	0.824943	5.71907	1.07107e-08	4.69173e-08
ENSG00000158125	XDH	4.87251	5.03617	0.880722	5.71823	1.0764e-08	4.71292e-08
ENSG00000175084	DES	10.3936	5.10878	0.893738	5.71619	1.08938e-08	4.76686e-08
ENSG00000216998	CYP2AC1P	2.70488	-4.29406	0.753359	-5.69989	1.19885e-08	5.22368e-08
ENSG00000146521	LINC01558	5.72845	-4.74797	0.833126	-5.69898	1.20526e-08	5.2508e-08
ENSG00000133454	MYO18B	120.77	4.0457	0.712052	5.68175	1.33326e-08	5.77785e-08
ENSG00000165929	TC2N	7.61106	3.29846	0.581645	5.67092	1.42031e-08	6.14033e-08
ENSG00000143107	FNDC7	3.6268	3.24243	0.571936	5.66922	1.43452e-08	6.19804e-08
ENSG00000224559	LINC01087	5.82375	-3.52941	0.622597	-5.66886	1.43752e-08	6.20914e-08
ENSG00000131242	RAB11FIP4	8.63036	2.40358	0.424173	5.6665	1.45741e-08	6.29127e-08
ENSG00000205403	CFI	1932.15	-2.23093	0.39398	-5.66256	1.49133e-08	6.43204e-08
ENSG00000225535	LINC01393	3.53018	3.65426	0.645496	5.66116	1.50349e-08	6.48244e-08
ENSG00000198691	ABCA4	98.6724	-2.19204	0.387313	-5.65962	1.5171e-08	6.53623e-08
ENSG00000188729	OSTN	15.6233	4.37117	0.77328	5.65277	1.57887e-08	6.79318e-08
ENSG00000145808	ADAMTS19	6.16357	4.33654	0.768711	5.64131	1.68756e-08	7.23493e-08
ENSG00000120949	TNFRSF8	98.2523	2.70912	0.480279	5.64072	1.69344e-08	7.25905e-08
ENSG00000175302	ANKRD30BP1	6.69876	4.91123	0.87083	5.63971	1.70332e-08	7.29814e-08
ENSG00000110436	SLC1A2	8.15818	5.31637	0.942775	5.63907	1.70972e-08	7.32446e-08
ENSG00000100628	ASB2	11.336	4.84846	0.861255	5.62952	1.80707e-08	7.72313e-08
ENSG00000105501	SIGLEC5	4.55692	-3.64919	0.648351	-5.62841	1.81879e-08	7.77094e-08
ENSG00000126895	AVPR2	3.1244	-3.59959	0.640054	-5.62389	1.86702e-08	7.96756e-08
ENSG00000163032	VSNL1	5.19638	4.49499	0.799519	5.62212	1.88625e-08	8.04721e-08
ENSG00000112812	PRSS16	6.98083	2.80433	0.499236	5.61724	1.94032e-08	8.2632e-08
ENSG00000180806	HOXC9	15.137	3.94946	0.703326	5.6154	1.96104e-08	8.34651e-08
ENSG00000164532	TBX20	151.548	2.05886	0.366751	5.61378	1.97955e-08	8.42158e-08
ENSG00000211767	TRBJ2-3	13.0614	-4.17901	0.745098	-5.60868	2.03881e-08	8.66344e-08
ENSG00000129465	RIPK3	252.89	-2.81311	0.501744	-5.60666	2.06266e-08	8.75961e-08
ENSG00000160593	JAML	4.27957	-4.26124	0.760151	-5.60578	2.07316e-08	8.80161e-08
ENSG00000184523	PTGER4P2	8.37048	-3.01159	0.537887	-5.59893	2.15677e-08	9.14174e-08
ENSG00000163492	CCDC141	30.124	2.39394	0.427807	5.59584	2.19554e-08	9.29789e-08
ENSG00000224299	MTATP6P16	4.2797	4.63671	0.828872	5.594	2.21892e-08	9.39001e-08
ENSG00000162753	SLC9C2	17.9174	2.53968	0.454176	5.59184	2.24676e-08	9.50084e-08
ENSG00000158089	GALNT14	21.3823	-3.38368	0.605317	-5.58993	2.27161e-08	9.59888e-08
ENSG00000166670	MMP10	413.54	-2.30448	0.413016	-5.57965	2.40999e-08	1.01583e-07
ENSG00000197757	HOXC6	4.4675	4.3492	0.781242	5.56703	2.59115e-08	1.08884e-07
ENSG00000158525	CPA5	3.7641	3.97519	0.714189	5.56602	2.60628e-08	1.09504e-07
ENSG00000166689	PLEKHA7	449.839	2.47363	0.445213	5.55605	2.75945e-08	1.15586e-07
ENSG00000154027	AK5	1425.36	2.31361	0.416518	5.55465	2.78176e-08	1.16402e-07
ENSG00000134215	VAV3	82.8267	-2.99593	0.540658	-5.54126	3.00309e-08	1.2519e-07
ENSG00000223816	IGKV1OR2-2	4.89876	-3.2951	0.594694	-5.54082	3.01055e-08	1.25483e-07
ENSG00000105989	WNT2	45.8208	6.5616	1.18813	5.52264	3.33942e-08	1.3843e-07
ENSG00000186847	KRT14	9.24918	5.28579	0.957269	5.52174	3.3566e-08	1.39062e-07
ENSG00000184530	C6orf58	3.94971	2.50455	0.4545	5.51056	3.57692e-08	1.47701e-07
ENSG00000162894	FCMR	15.4044	2.97288	0.539728	5.5081	3.62722e-08	1.49671e-07
ENSG00000155719	OTOA	6.4915	-2.82253	0.512473	-5.50766	3.63632e-08	1.50003e-07
ENSG00000131386	GALNT15	372.853	-2.08046	0.378342	-5.49888	3.822e-08	1.57393e-07
ENSG00000224965	KCNC4-AS1	26.7503	2.76726	0.503986	5.49074	4.00243e-08	1.64517e-07
ENSG00000172296	SPTLC3	67.138	2.11519	0.385789	5.48277	4.18707e-08	1.71666e-07
ENSG00000146678	IGFBP1	123.256	-2.64744	0.483684	-5.47349	4.41256e-08	1.80628e-07
ENSG00000164265	SCGB3A2	11.5882	4.89919	0.89542	5.47138	4.46537e-08	1.82686e-07
ENSG00000133800	LYVE1	141.754	-3.40644	0.622969	-5.46806	4.54981e-08	1.85982e-07
ENSG00000015413	DPEP1	7.29195	-3.27028	0.598644	-5.46281	4.68645e-08	1.91377e-07
ENSG00000108001	EBF3	741.114	3.28738	0.604474	5.43841	5.37593e-08	2.18111e-07
ENSG00000108375	RNF43	52.4865	2.06052	0.379791	5.42541	5.78223e-08	2.33871e-07
ENSG00000173702	MUC13	5.34355	2.94721	0.543332	5.42432	5.81752e-08	2.35199e-07
ENSG00000085552	IGSF9	6.1313	2.44055	0.449977	5.42373	5.83678e-08	2.35945e-07
ENSG00000167612	ANKRD33	15.7823	-3.29327	0.608622	-5.41103	6.26648e-08	2.52853e-07
ENSG00000207563	MIR23B	3.00207	3.71529	0.686878	5.40895	6.33964e-08	2.55734e-07
ENSG00000225940	C5orf67	8.27879	-5.21474	0.965526	-5.40093	6.62955e-08	2.66942e-07
ENSG00000215004	MESTP4	27.315	2.93229	0.542974	5.40041	6.64872e-08	2.67602e-07
ENSG00000145794	MEGF10	7.01727	-3.88977	0.721111	-5.39414	6.88534e-08	2.767e-07
ENSG00000169129	AFAP1L2	56.0001	-3.28696	0.611677	-5.37368	7.71438e-08	3.08468e-07
ENSG00000175463	TBC1D10C	18.4831	2.10483	0.392588	5.36143	8.2567e-08	3.29012e-07
ENSG00000166257	SCN3B	9.29525	-2.2154	0.413267	-5.36069	8.29051e-08	3.30222e-07
ENSG00000198326	TMEM239	4.45462	4.58652	0.856925	5.3523	8.68437e-08	3.45432e-07
ENSG00000156206	CFAP161	4.67694	-3.14214	0.587124	-5.35175	8.711e-08	3.46396e-07
ENSG00000152292	SH2D6	4.79919	2.50146	0.467829	5.34696	8.94433e-08	3.55037e-07
ENSG00000183150	GPR19	6.90627	-2.12254	0.397027	-5.34609	8.9875e-08	3.56603e-07
ENSG00000225950	NTF4	18.1515	2.26273	0.423369	5.34458	9.06245e-08	3.59429e-07
ENSG00000179388	EGR3	195.412	3.23518	0.60601	5.33848	9.37282e-08	3.71186e-07
ENSG00000135549	PKIB	15.5133	2.96175	0.555057	5.33593	9.5054e-08	3.76065e-07
ENSG00000124493	GRM4	4.29544	2.75078	0.5183	5.30731	1.11257e-07	4.36991e-07
ENSG00000185527	PDE6G	19.4112	-2.4694	0.465337	-5.3067	1.11629e-07	4.3827e-07
ENSG00000122194	PLG	6.75078	2.8008	0.527889	5.30565	1.1227e-07	4.40605e-07
ENSG00000131746	TNS4	5.06869	3.88208	0.733012	5.29607	1.18322e-07	4.6335e-07
ENSG00000170298	LGALS9B	5.51775	-3.3258	0.628004	-5.29583	1.1848e-07	4.63904e-07
ENSG00000148357	HMCN2	3.48346	-3.71516	0.701553	-5.29562	1.18613e-07	4.64362e-07
ENSG00000204851	PNMAL2	17.4113	2.05901	0.388857	5.29503	1.18997e-07	4.65766e-07
ENSG00000140600	SH3GL3	6.0765	2.60639	0.492265	5.29468	1.19224e-07	4.66501e-07
ENSG00000075340	ADD2	68.3739	-3.17896	0.60077	-5.29149	1.21327e-07	4.74214e-07
ENSG00000147180	ZNF711	239.892	-2.5369	0.480887	-5.27545	1.32434e-07	5.1525e-07
ENSG00000176998	HCG4	54.2348	2.68132	0.508794	5.26994	1.36466e-07	5.29648e-07
ENSG00000143595	AQP10	21.0535	2.24023	0.425736	5.26201	1.42486e-07	5.52046e-07
ENSG00000162460	TMEM82	9.84406	-2.8023	0.532821	-5.25937	1.44548e-07	5.59661e-07
ENSG00000137875	BCL2L10	8.82707	-3.13067	0.59546	-5.25758	1.45965e-07	5.64768e-07
ENSG00000145692	BHMT	4.39969	3.40384	0.64797	5.25308	1.49577e-07	5.77812e-07
ENSG00000227039	ITGB2-AS1	12.866	3.06543	0.583827	5.25057	1.51627e-07	5.85336e-07
ENSG00000107014	RLN2	8.54779	-2.4056	0.458785	-5.24342	1.57624e-07	6.07673e-07
ENSG00000077063	CTTNBP2	33.258	3.75439	0.716042	5.24325	1.57771e-07	6.0816e-07
ENSG00000176358	TAC4	2.75228	-3.09608	0.590598	-5.24228	1.58604e-07	6.11206e-07
ENSG00000113494	PRLR	6.9033	4.57535	0.873142	5.2401	1.60494e-07	6.1791e-07
ENSG00000104313	EYA1	5.52066	4.52527	0.866428	5.22291	1.76135e-07	6.76234e-07
ENSG00000166863	TAC3	28.3853	5.77211	1.10685	5.2149	1.83919e-07	7.05085e-07
ENSG00000108511	HOXB6	52.2986	-2.6477	0.507739	-5.21469	1.84128e-07	7.05793e-07
ENSG00000182261	NLRP10	8.13744	5.08695	0.976104	5.21148	1.87339e-07	7.17812e-07
ENSG00000107518	ATRNL1	8.89136	3.43126	0.659574	5.20223	1.96914e-07	7.52399e-07
ENSG00000201684	RN7SKP239	3.02042	3.34692	0.644442	5.19351	2.06365e-07	7.85812e-07
ENSG00000165092	ALDH1A1	6039.46	-2.94446	0.56766	-5.18701	2.13702e-07	8.11703e-07
ENSG00000117407	ARTN	4.76559	2.15089	0.414949	5.1835	2.17757e-07	8.26557e-07
ENSG00000182866	LCK	3.36678	-3.54612	0.684436	-5.18109	2.20591e-07	8.36957e-07
ENSG00000039600	SOX30	8.68305	2.1875	0.422395	5.17881	2.23306e-07	8.46952e-07
ENSG00000179046	TRIML2	59.5635	-5.12204	0.989477	-5.17651	2.26072e-07	8.56542e-07
ENSG00000186472	PCLO	41.8232	-2.45442	0.474268	-5.17518	2.27692e-07	8.6211e-07
ENSG00000115648	MLPH	74.0341	2.92614	0.565944	5.17037	2.3363e-07	8.82738e-07
ENSG00000124882	EREG	10.9531	3.52299	0.683184	5.15672	2.51317e-07	9.45261e-07
ENSG00000130649	CYP2E1	131.448	2.45103	0.47533	5.15649	2.51621e-07	9.46248e-07
ENSG00000164283	ESM1	17429.9	-2.37083	0.459856	-5.15558	2.52841e-07	9.50214e-07
ENSG00000141665	FBXO15	6.4677	2.49703	0.484542	5.15339	2.55821e-07	9.61037e-07
ENSG00000115361	ACADL	7.58537	5.20677	1.01057	5.15229	2.57324e-07	9.66069e-07
ENSG00000189221	MAOA	1145.26	-2.67224	0.518976	-5.14907	2.61779e-07	9.82138e-07
ENSG00000141293	SKAP1	4.25458	-3.02782	0.588549	-5.14455	2.68163e-07	1.00335e-06
ENSG00000204866	IGFL2	6.70895	4.36576	0.850271	5.13455	2.82816e-07	1.05502e-06
ENSG00000046604	DSG2	53.0894	4.46867	0.871555	5.12723	2.94036e-07	1.09433e-06
ENSG00000080854	IGSF9B	20.5283	2.29851	0.449017	5.11898	3.07187e-07	1.13988e-06
ENSG00000169429	CXCL8	37626	2.87198	0.561526	5.11461	3.14398e-07	1.16514e-06
ENSG00000100024	UPB1	45.0851	2.37626	0.465294	5.107	3.27306e-07	1.21033e-06
ENSG00000228022	HCG20	12.8256	2.42197	0.474374	5.10562	3.29717e-07	1.21846e-06
ENSG00000133256	PDE6B	12.7856	-2.00014	0.391927	-5.10334	3.33707e-07	1.23258e-06
ENSG00000139209	SLC38A4	32.2472	2.61303	0.512542	5.09818	3.42931e-07	1.26503e-06
ENSG00000138669	PRKG2	45.7286	5.63719	1.1059	5.09737	3.4441e-07	1.27015e-06
ENSG00000142233	NTN5	8.66036	2.05713	0.40406	5.09116	3.55888e-07	1.31047e-06
ENSG00000100253	MIOX	2.60374	3.63172	0.714468	5.08311	3.71303e-07	1.36411e-06
ENSG00000228340	MIR646HG	27.7865	2.74605	0.540692	5.07877	3.79885e-07	1.39438e-06
ENSG00000227986	TRIM60P18	15.345	2.05287	0.404378	5.07662	3.84206e-07	1.40916e-06
ENSG00000014257	ACPP	5.29059	4.32082	0.852437	5.06879	4.00354e-07	1.46503e-06
ENSG00000204338	CYP21A1P	9.73625	2.14843	0.424578	5.06015	4.18933e-07	1.5303e-06
ENSG00000176490	DIRAS1	16.0945	3.65546	0.722805	5.05733	4.25166e-07	1.55228e-06
ENSG00000128594	LRRC4	25.9763	-2.07265	0.410209	-5.05266	4.35706e-07	1.58855e-06
ENSG00000118307	CASC1	9.87486	2.37251	0.469584	5.05238	4.36343e-07	1.59047e-06
ENSG00000135406	PRPH	26.4767	2.49072	0.493655	5.04547	4.52402e-07	1.6465e-06
ENSG00000170579	DLGAP1	579.433	2.57466	0.510685	5.04158	4.61696e-07	1.67821e-06
ENSG00000226935	LINC00161	9.88511	2.89106	0.573499	5.0411	4.62864e-07	1.68203e-06
ENSG00000197465	GYPE	122.994	2.38832	0.474189	5.03665	4.73754e-07	1.71943e-06
ENSG00000148541	FAM13C	64.2251	2.5205	0.50115	5.02943	4.91945e-07	1.78097e-06
ENSG00000167165	UGT1A6	5.00901	3.96074	0.788632	5.0223	5.10573e-07	1.84423e-06
ENSG00000219253	RPS6P7	2.81048	-4.22937	0.844482	-5.00825	5.49285e-07	1.97712e-06
ENSG00000123560	PLP1	4.97353	3.91849	0.782738	5.00613	5.55359e-07	1.99774e-06
ENSG00000018625	ATP1A2	20.3308	4.1192	0.825419	4.99043	6.02442e-07	2.15794e-06
ENSG00000168079	SCARA5	279.323	6.10159	1.22305	4.98883	6.07471e-07	2.17488e-06
ENSG00000110786	PTPN5	10.2264	4.63797	0.930431	4.98476	6.20401e-07	2.21951e-06
ENSG00000223963	THAP12P8	25.1598	2.88231	0.579037	4.97777	6.43226e-07	2.29689e-06
ENSG00000224940	PRRT4	5.1586	3.89636	0.785172	4.96243	6.96181e-07	2.47709e-06
ENSG00000173762	CD7	6.88412	3.2876	0.663234	4.95692	7.16202e-07	2.54392e-06
ENSG00000101276	SLC52A3	4.71927	-3.87274	0.782911	-4.94659	7.55249e-07	2.67635e-06
ENSG00000164266	SPINK1	4.9919	4.27761	0.866028	4.93934	7.83859e-07	2.77364e-06
ENSG00000197520	FAM177B	18.4698	2.12162	0.429816	4.93612	7.96918e-07	2.81708e-06
ENSG00000211696	TRGV8	3.71322	4.55393	0.923841	4.92935	8.25046e-07	2.90973e-06
ENSG00000149591	TAGLN	99450.4	2.97786	0.60502	4.92193	8.56959e-07	3.01748e-06
ENSG00000185640	KRT79	7.55868	3.14868	0.640426	4.91655	8.80838e-07	3.09777e-06
ENSG00000204361	NXPE2	5.49089	2.51287	0.512059	4.90738	9.23006e-07	3.24014e-06
ENSG00000166035	LIPC	16.6573	2.49785	0.509187	4.90556	9.31614e-07	3.26836e-06
ENSG00000166432	ZMAT1	489.149	-2.11022	0.430452	-4.90233	9.47046e-07	3.32048e-06
ENSG00000166840	GLYATL1	14.887	2.18397	0.445748	4.89956	9.60501e-07	3.36397e-06
ENSG00000151062	CACNA2D4	45.5097	-2.10838	0.430936	-4.89256	9.95318e-07	3.48041e-06
ENSG00000072657	TRHDE	182.317	5.94528	1.21776	4.88216	1.04931e-06	3.66076e-06
ENSG00000183914	DNAH2	37.5155	3.09965	0.636409	4.87054	1.11296e-06	3.86877e-06
ENSG00000125848	FLRT3	13.2196	2.42427	0.49783	4.86968	1.11781e-06	3.88328e-06
ENSG00000175899	A2M	1517.79	-2.75071	0.565691	-4.86256	1.15875e-06	4.01485e-06
ENSG00000187094	CCK	5.00043	4.66667	0.960465	4.85876	1.18121e-06	4.08728e-06
ENSG00000102445	KIAA0226L	3.3414	4.06289	0.836418	4.85748	1.18887e-06	4.11082e-06
ENSG00000203799	CCDC162P	6.63862	2.28753	0.471424	4.85238	1.21989e-06	4.21354e-06
ENSG00000206384	COL6A6	15.1066	3.93163	0.811591	4.84434	1.27031e-06	4.37818e-06
ENSG00000112041	TULP1	2.53383	4.10959	0.850343	4.83286	1.34584e-06	4.61975e-06
ENSG00000184774	MGAT4EP	11.676	4.14723	0.862655	4.80752	1.52815e-06	5.21081e-06
ENSG00000213771	KRT8P37	17.5413	3.25554	0.677297	4.80667	1.53462e-06	5.23225e-06
ENSG00000117600	PLPPR4	46.8817	3.37569	0.704998	4.78822	1.68268e-06	5.71136e-06
ENSG00000204860	FAM201A	47.4982	-2.2077	0.461638	-4.78232	1.73287e-06	5.87548e-06
ENSG00000120149	MSX2	26.4091	2.2772	0.476255	4.78147	1.74019e-06	5.89962e-06
ENSG00000007968	E2F2	19.82	-2.14238	0.448713	-4.7745	1.80155e-06	6.09831e-06
ENSG00000182585	EPGN	83.1937	2.51562	0.528622	4.75883	1.94717e-06	6.56883e-06
ENSG00000133958	UNC79	3.62391	2.51415	0.528543	4.75675	1.96733e-06	6.63219e-06
ENSG00000186047	DLEU7	4.67525	2.47274	0.520283	4.75268	2.00742e-06	6.76025e-06
ENSG00000060558	GNA15	5.9674	-2.20782	0.464952	-4.74849	2.04943e-06	6.89042e-06
ENSG00000158258	CLSTN2	31.0347	2.56775	0.54202	4.73737	2.16513e-06	7.25486e-06
ENSG00000164089	ETNPPL	4.86007	-3.98593	0.842662	-4.73016	2.24339e-06	7.50662e-06
ENSG00000100365	NCF4	7.43799	3.17852	0.672256	4.72814	2.26588e-06	7.57571e-06
ENSG00000216331	HIST1H1PS1	6.33545	2.67329	0.566814	4.71635	2.40111e-06	8.00185e-06
ENSG00000163810	TGM4	4.90005	-2.31752	0.493108	-4.69982	2.60386e-06	8.63954e-06
ENSG00000197992	CLEC9A	2.4748	-4.03555	0.858714	-4.69952	2.60772e-06	8.64938e-06
ENSG00000164122	ASB5	5.08293	4.768	1.01619	4.69204	2.7049e-06	8.96034e-06
ENSG00000179111	HES7	9.5126	-2.07442	0.442622	-4.68666	2.77705e-06	9.18247e-06
ENSG00000225572	DOCK4-AS1	2.83491	-2.97816	0.636035	-4.68238	2.83559e-06	9.35992e-06
ENSG00000184313	MROH7	9.17791	2.30258	0.491903	4.68095	2.85547e-06	9.42098e-06
ENSG00000180537	RNF182	36.6117	2.21607	0.474461	4.67071	3.00156e-06	9.87833e-06
ENSG00000146038	DCDC2	11.4295	4.05893	0.870833	4.66097	3.14719e-06	1.03316e-05
ENSG00000204624	DISP3	5.29405	-2.30464	0.49487	-4.65706	3.20756e-06	1.0519e-05
ENSG00000128285	MCHR1	12.2714	2.55494	0.549584	4.64886	3.33771e-06	1.09235e-05
ENSG00000149294	NCAM1	139.738	2.4261	0.522675	4.64169	3.45569e-06	1.12891e-05
ENSG00000105509	HAS1	15.62	2.6801	0.578078	4.63623	3.54822e-06	1.1573e-05
ENSG00000112246	SIM1	2.64458	-3.85753	0.834147	-4.62452	3.75467e-06	1.22145e-05
ENSG00000168122	ZNF355P	7.33091	-2.3018	0.498746	-4.61517	3.92767e-06	1.27385e-05
ENSG00000163362	C1orf106	4.46142	3.10111	0.672475	4.61149	3.99794e-06	1.29446e-05
ENSG00000080709	KCNN2	7.5555	-3.50999	0.762983	-4.60036	4.2177e-06	1.36026e-05
ENSG00000144278	GALNT13	57.6502	-2.60931	0.568555	-4.58938	4.44566e-06	1.43058e-05
ENSG00000156689	GLYATL2	5.50388	4.4545	0.970813	4.58842	4.46612e-06	1.43652e-05
ENSG00000144290	SLC4A10	3.33903	-2.78125	0.607472	-4.5784	4.68538e-06	1.50285e-05
ENSG00000114757	PEX5L	4.18107	2.45837	0.537037	4.57765	4.70218e-06	1.5074e-05
ENSG00000156127	BATF	24.7083	-3.97787	0.870925	-4.56741	4.93793e-06	1.57928e-05
ENSG00000214851	LINC00612	3.58154	-2.20846	0.484963	-4.55387	5.26687e-06	1.67908e-05
ENSG00000183644	C11orf88	5.27649	3.69602	0.812115	4.55111	5.33645e-06	1.69957e-05
ENSG00000082684	SEMA5B	8.69421	4.56673	1.00462	4.54572	5.47469e-06	1.74206e-05
ENSG00000215174	NLRP2B	3.01371	-3.09637	0.68151	-4.54339	5.53557e-06	1.76065e-05
ENSG00000164627	KIF6	8.00318	2.02482	0.446923	4.53058	5.88219e-06	1.86226e-05
ENSG00000119946	CNNM1	6.17202	2.45682	0.543148	4.5233	6.08833e-06	1.92435e-05
ENSG00000166292	TMEM100	51.3349	-2.03462	0.449832	-4.52306	6.0952e-06	1.92631e-05
ENSG00000162631	NTNG1	128.763	2.01134	0.445543	4.51436	6.35085e-06	2.00272e-05
ENSG00000170500	LONRF2	4.04264	3.10512	0.688582	4.50944	6.4998e-06	2.0461e-05
ENSG00000100505	TRIM9	4.0611	2.68006	0.59918	4.47287	7.7177e-06	2.40583e-05
ENSG00000154678	PDE1C	509.345	2.37684	0.533885	4.45196	8.50904e-06	2.63881e-05
ENSG00000053108	FSTL4	3.94855	-3.28182	0.737183	-4.45184	8.51359e-06	2.63965e-05
ENSG00000224238	WARS2-IT1	3.63502	3.64573	0.819561	4.44839	8.65182e-06	2.68078e-05
ENSG00000104818	CGB2	3.79661	3.09167	0.696013	4.44197	8.91401e-06	2.75965e-05
ENSG00000165197	VEGFD	6.76396	-2.1167	0.476959	-4.43791	9.0835e-06	2.81e-05
ENSG00000142512	SIGLEC10	5.06566	2.75451	0.620837	4.43677	9.13207e-06	2.82442e-05
ENSG00000182557	SPNS3	8.71168	-2.33214	0.525728	-4.43602	9.1636e-06	2.83357e-05
ENSG00000175879	HOXD8	99.0124	-2.78448	0.627858	-4.43488	9.21232e-06	2.84833e-05
ENSG00000145824	CXCL14	7.92582	4.85962	1.09592	4.43426	9.23871e-06	2.85514e-05
ENSG00000167105	TMEM92	4.67602	2.57939	0.581974	4.43214	9.33012e-06	2.88104e-05
ENSG00000112303	VNN2	6.0746	3.38795	0.764732	4.43025	9.41248e-06	2.90429e-05
ENSG00000183148	ANKRD20A2	8.58917	-2.34081	0.528789	-4.42674	9.56679e-06	2.94874e-05
ENSG00000111732	AICDA	2.09167	3.20152	0.726679	4.40569	1.05447e-05	3.23218e-05
ENSG00000178342	KCNG2	11.9927	2.48246	0.563594	4.40468	1.05938e-05	3.24586e-05
ENSG00000153930	ANKFN1	10.5937	-2.9855	0.678846	-4.3979	1.09304e-05	3.3447e-05
ENSG00000227145	IL21-AS1	8.46186	4.33163	0.985068	4.3973	1.09608e-05	3.35294e-05
ENSG00000138311	ZNF365	276.118	2.02888	0.461922	4.39225	1.12183e-05	3.42771e-05
ENSG00000223586	LINC01312	3.54911	4.24202	0.96709	4.38638	1.15254e-05	3.51708e-05
ENSG00000104059	FAM189A1	33.5692	2.52048	0.575328	4.38094	1.18168e-05	3.60141e-05
ENSG00000167178	ISLR2	4.95844	4.1297	0.945763	4.36653	1.26238e-05	3.8344e-05
ENSG00000105717	PBX4	6.08362	3.40253	0.779662	4.36411	1.27643e-05	3.87421e-05
ENSG00000214725	CDIPT-AS1	3.45477	2.48942	0.570447	4.36397	1.27723e-05	3.8758e-05
ENSG00000197993	KEL	13.3053	2.82091	0.64805	4.35291	1.3434e-05	4.06548e-05
ENSG00000130234	ACE2	8.67226	2.5476	0.586471	4.34394	1.39947e-05	4.22672e-05
ENSG00000226416	MRPL23-AS1	5.06721	3.29742	0.759341	4.34248	1.40886e-05	4.25242e-05
ENSG00000154479	CCDC173	2.69134	2.95769	0.681402	4.34059	1.421e-05	4.28771e-05
ENSG00000072182	ASIC4	4.71856	2.66232	0.613968	4.33625	1.44933e-05	4.36677e-05
ENSG00000138207	RBP4	6.91693	2.37896	0.548629	4.3362	1.44965e-05	4.3673e-05
ENSG00000079841	RIMS1	175.429	2.67414	0.62114	4.30521	1.66829e-05	4.99153e-05
ENSG00000145198	VWA5B2	7.83785	2.42126	0.563293	4.29841	1.72031e-05	5.14025e-05
ENSG00000115155	OTOF	66.3584	-2.7571	0.641563	-4.29748	1.72755e-05	5.16079e-05
ENSG00000162981	FAM84A	20.7047	-2.47114	0.575909	-4.29085	1.77988e-05	5.30503e-05
ENSG00000106302	HYAL4	8.85273	-3.23406	0.756135	-4.27709	1.89352e-05	5.62396e-05
ENSG00000204740	MALRD1	4.06271	4.43879	1.0392	4.27137	1.94275e-05	5.75948e-05
ENSG00000128573	FOXP2	36.948	3.20478	0.750414	4.27069	1.94872e-05	5.77616e-05
ENSG00000166546	BEAN1	4.35934	2.02792	0.475056	4.26879	1.96533e-05	5.81985e-05
ENSG00000109758	HGFAC	5.00049	-2.08175	0.487931	-4.2665	1.98566e-05	5.87522e-05
ENSG00000136267	DGKB	3.54925	4.3538	1.02086	4.26485	2.00041e-05	5.91823e-05
ENSG00000186439	TRDN	8.18406	3.96706	0.930983	4.26115	2.03379e-05	6.01143e-05
ENSG00000229266	POM121L8P	4.55467	3.14637	0.740158	4.25094	2.12877e-05	6.27994e-05
ENSG00000148053	NTRK2	47.2154	3.98163	0.938728	4.24151	2.22022e-05	6.53565e-05
ENSG00000150045	KLRF1	3.02632	-3.09126	0.729667	-4.23653	2.26999e-05	6.67604e-05
ENSG00000100033	PRODH	5.12735	-2.03307	0.480162	-4.23412	2.29448e-05	6.74462e-05
ENSG00000211768	TRBJ2-4	2.39239	-3.7907	0.895583	-4.23266	2.3094e-05	6.7864e-05
ENSG00000184106	TREML3P	5.02761	4.34927	1.02907	4.22639	2.37471e-05	6.96837e-05
ENSG00000228203	RNF144A-AS1	7.00708	-2.40583	0.570809	-4.21477	2.50032e-05	7.31833e-05
ENSG00000153347	FAM81B	3.07546	-2.70498	0.642853	-4.20777	2.579e-05	7.53943e-05
ENSG00000125414	MYH2	4.91459	4.42328	1.05127	4.20756	2.58144e-05	7.5458e-05
ENSG00000184515	BEX5	3.66418	-4.27736	1.01707	-4.20558	2.60412e-05	7.6059e-05
ENSG00000124749	COL21A1	271.114	2.33771	0.558908	4.18264	2.88146e-05	8.36929e-05
ENSG00000138395	CDK15	20.646	5.1876	1.24103	4.18007	2.91424e-05	8.45937e-05
ENSG00000184731	FAM110C	7.90184	4.53219	1.08532	4.17589	2.96823e-05	8.60395e-05
ENSG00000198643	FAM3D	2.01717	-3.50346	0.842575	-4.15804	3.2099e-05	9.26068e-05
ENSG00000163449	TMEM169	3.87181	2.78925	0.670955	4.15713	3.22268e-05	9.29442e-05
ENSG00000103175	WFDC1	36.1809	5.01319	1.20808	4.14973	3.32867e-05	9.5832e-05
ENSG00000106631	MYL7	5.33346	4.08946	0.985827	4.14825	3.3502e-05	9.64229e-05
ENSG00000142748	FCN3	3.73304	-2.07315	0.499773	-4.14817	3.35142e-05	9.64484e-05
ENSG00000079215	SLC1A3	18.0667	2.23148	0.53809	4.14704	3.36799e-05	9.68769e-05
ENSG00000175664	TEX26	2.12438	3.74697	0.913059	4.10376	4.06488e-05	0.000115732
ENSG00000181374	CCL13	21.0402	5.12757	1.25102	4.09872	4.15434e-05	0.000118162
ENSG00000136732	GYPC	1079.26	2.13906	0.523072	4.08942	4.32445e-05	0.000122674
ENSG00000171051	FPR1	4.3554	4.28696	1.0492	4.08594	4.38983e-05	0.000124418
[truncated: 91 more rows]
