# Supplementary material for: Genomic profiling of human vascular cells identifies TWIST1 as a causal gene for common vascular diseases
Source: PLoS Genet. 2020 Jan 9;16(1):e1008538. doi: 10.1371/journal.pgen.1008538 (PMC6975560; doi:10.1371/journal.pgen.1008538)
Supplement: S4 Table — Table includes the position of all SNPs that showed ASE, corresponding gene annotation, cell type in which ASE was observed, whether this was a GTEx eGENE or GWAS colocalization site, and the average number of reads obtained for the major or reference (REF) and the minor or alternate (ALT) alleles. GTEx eGene tissues: A = Artery_Aorta; C = Artery_Coronary; T = Artery_Tibial. GWAS colocalization traits: CAD = Coronary Artery Disease; MIG = Migraine. (XLSX) [file pgen.1008538.s021.xlsx]

## Sheet: Sheet1
CHR	POSITION	RSID	GENE	CELLTYPE	GTEx.eGENE	GWAS COLOC	AVERAGE READS (REF/ALT)
chr10	121586826	rs56055506	INPP5F	hcaec	A,C,T	-	136.3/20.4
chr10	121586881	rs3188055		hcaec			132.1/38.2
chr10	121588037	rs1063224		hcaec, hcasmc			49.8/82.4,36.6/40.5
chr10	131265544	rs16906252	MGMT	hcaec, hcasmc	A,C,T	-	59.8/0.4,68.3/2
chr10	131506191	rs1803965		hcaec	NA		18.8/44
chr10	131506282	rs12917		hcaec	NA		40.3/40
chr10	131565169	rs2308327		hcaec	NA		75.6/9.6
chr10	134018482	rs114235518	DPYSL4	hcaec	A,C,T	-	33.3/28.8
chr10	28812065	rs2998283	WAC-AS1	hcaec	A,C,T	-	18.1/29.2
chr10	61412200	rs17776046	SLC16A9	hcaec	A,C,T	-	27.9/8.5
chr10	77807026	rs1898071	C10orf11	hcaec	-	-	34.9/36.7
chr10	88730311	rs4869	ADIRF-AS1	hcasmc	A,C,T	-	184.7/98.6
chr10	88730373	rs7960
chr10	99376151	rs3814556	MORN4	hcaec	A,C,T	-	40.7/7.1
chr11	102660958	rs2071230	MMP1	hcaec	A,C,T	-	8.5/29.5
chr11	104905046	rs539595	CASP1	hcaec	A,C,T	-	46/6.8
chr11	113194167	rs723077	TTC12	hcaec	A,C,T	-	31.4/18.8
chr11	118478403	rs4938515	PHLDB1	hcasmc	A,C,T	-	27/51.9
chr11	120355790	rs9625	ARHGEF12	hcaec, hcasmc	A,C,T	-	59.6/50.2,38.7/28.7
chr11	124016739	rs9326269	VWA5A	hcaec	A,C,T	-	4.5/16.5
chr11	124016819	rs3824997
chr11	124017157	rs1939860
chr1	117529457	rs10801922	PTGFRN	hcaec	A,C,T	-	111.8/164.7
chr1	117530272	rs3885
chr1	117530506	rs1127655
chr1	117530620	rs4620527
chr1	117531619	rs13951
chr1	117531812	rs3829881
chr1	117532290	rs8254
chr11	32125960	rs11529889	RCN1	hcaec, hcasmc	A,C,T	-	1688.3/563,1128.3/382.9
chr11	34912058	rs138288686	APIP	hcaec	A,C,T	-	166.5/8.5
chr1	143906121	rs373752917	FAM72D	hcaec	A,C,T	-	26/7.7
chr11	44089351	rs33952257	ACCS	hcaec	A,C,T	-	19.5/6.8
chr1	146467415	rs587652011	NBPF12	hcaec	-	-	91.1/1.3
chr1	1469597	rs9439464	ATAD3A	hcaec, hcasmc	A,C,T	-	96/9.7,24.4/6.9
chr1	1469598	rs3128343		hcaec			93/12.4
chr1	1469605	rs35611435		hcaec, hcasmc			110.7/3.4,31.5/3.8
chr1	151313773	rs7552906	RFX5	hcaec	A,C,T	-	25.7/42.8
chr1	151846516	rs13320	THEM4	hcaec	A,C,T	-	11.8/50.7
chr1	153907305	rs2275483	DENND4B	hcaec	A,C,T	-	53/3.5
chr11	58317598	rs1802347	LPXN	hcaec	A,C,T	-	106.6/4.5
chr1	159169640	rs862999	CADM3	hcaec	A,C,T	-	29.4/347.2
chr1	162754243	rs2257976	DDR2	hcaec	A,C,T	-	7/75.9
chr1	165667780	rs12408101	ALDH9A1	hcaec, hcasmc	A,C,T	-	120.9/4.1,70.9/5.7
chr11	68665479	rs117105758	MRPL21	hcaec	A,C,T	-	563/9.8
chr1	169101272	rs1779796	ATP1B1	hcaec	A,C,T	-	51.7/8
chr1	171179286	rs7512785	FMO2	hcaec	A,C,T	-	8.7/11.3
chr1	171179476	rs7515157
chr1	171179778	rs73032526
chr11	74975661	rs2282600	ARRB1	hcaec	A,C,T	-	114.7/11.6
chr11	8014478	rs4758267	EIF3F	hcaec	A,C,T	-	1328.6/787.8
chr1	183114633	rs7473	LAMC1	hcaec, hcasmc	A,C,T	-	478/93,282.2/96.7
chr1	20977855	rs2078073	PINK1-AS	hcaec	-	-	1974-09-01
chr1	209799252	rs2179402	LAMB3	hcaec	A,C,T	-	16.5/47
chr1	209807971	rs1130667
chr12	10251444	rs2306894	CLEC1A	hcaec	A,C,T	-	16.9/113.9
chr12	113357441	rs2660	OAS1	hcaec	A,C,T	-	20.2/18.6
chr12	113410315	rs10744791	OAS3	hcaec	A,C,T	-	24.9/133.2
chr12	120067560	rs2301653	TMEM233	hcasmc	A,C,T	-	10.5/15.1
chr12	122845697	rs79909185	CLIP1	hcaec	A,C,T	-	239.5/17
chr12	124979832	rs872224	NCOR2	hcaec	A,C,T	-	28.4/22
chr12	27848071	rs145772097	PPFIBP1	hcaec	A,C,T	-	114.6/2
chr12	46581572	rs11183388	SLC38A1	hcaec	A,C,T	-	83/11.4
chr12	70928615	rs3752703	PTPRB	hcasmc	A,C,T	-	42.5/59.5
chr12	8902469	ss1388083950	RIMKLB	hcaec	A,C,T	-	166.5/2.8
chr12	9161647	ss1388092063	KLRG1	hcaec	A,C,T	-	37.2/26.7
chr12	93793784	rs3202408	NUDT4	hcaec	A,C,T	-	559.1/82.4
chr12	93796390	rs79574264
chr13	102366824	rs2281991	ITGBL1	hcaec	A,C,T	-	409.6/125.4
chr13	31905871	rs2056445	B3GALTL	hcaec, hcasmc	-	-	19.6/27.6,14.4/11.7
chr13	31905886	rs2056444
chr13	31905941	rs2056443
chr13	31906140	rs13080
chr13	43597864	rs12015	DNAJC15	hcaec	A,C,T	-	545.8/52.7
chr13	43682840	rs9533394
chr13	43683007	rs11728
chr13	43683019	rs11346
chr13	44466340	rs9533683	LACC1	hcaec	A,C,T	-	22.8/15.2
chr1	35259960	rs1764390	GJA4	hcaec	A,C,T	-	26.4/48.6
chr13	52603774	rs3742291	ALG11	hcaec	A,C,T	-	79.1/62.5
chr13	52603774	rs3742291		hcasmc			45.7/44.4
chr1	35261231	rs705193
chr13	53217034	rs9536211	HNRNPA1L2	hcaec	A,C,T	-	63.7/15.1
chr13	79174090	rs9601092	RP11-52L5.6	hcaec	-	-	54.8/7.2
chr13	79174186	rs41288262
chr14	23371267	rs56708790	RBM23	hcaec	A,C,T	-	129/14
chr14	39601189	rs74640611	GEMIN2	hcaec	A,C,T	-	67.6/4.8
chr14	50085410	rs2985698	RPL36AL	hcaec	A,C,T	-	50.6/6.1
chr1	47767913	rs3125630	STIL	hcaec	A,C,T	-	22.8/58.1
chr14	89627941	rs7156172	FOXN3	hcaec	A,C,T	-	91.3/8.2
chr15	23191508	rs7181814	WHAMMP3	hcaec	-	-	16.5/38
chr15	28929943	rs199530628	HERC2P9	hcaec	A,C,T	-	98.1/14.2
chr15	28929964	rs200609602
chr15	28930122	rs433905
chr15	28996718	rs201779329	WHAMMP2	hcaec	A,C,T	-	28.3/3
chr1	53072453	rs1970951	GPX7	hcaec	A,C,T	-	17.2/58.3
chr15	32815320	rs61620792	RP11-632K20.7	hcaec	-	-	40.5/33.3
chr15	34672760	rs3169217	GOLGA8A	hcaec	A,C,T	-	102.8/7
chr1	53547799	rs6687909	PODN	hcasmc	A,C,T	-	22.6/2.4
chr15	42140413	rs1197668	JMJD7-PLA2G4B	hcaec	A,C,T	-	15.6/9.9
chr15	48058070	rs532598	SEMA6D	hcasmc	A,C,T	-	12.6/4.5
chr15	49777467	rs60771113	FGF7	hcaec	A,C,T	-	67/13
chr15	63363401	rs11558748	TPM1	hcaec	A,C,T	-	1721/241
chr15	75012206	rs4986884	CYP1A1	hcaec	A,C,T	-	69.4/10.8
chr15	75012470	rs4986882
chr15	75012486	rs4986881
chr15	75305039	rs7174129	SCAMP5	hcaec	A,C,T	-	41.7/30
chr15	75311958	rs8033925
chr15	75311969	rs77976994
chr15	75312186	rs13056
chr15	75312714	rs3812943
chr15	75312952	rs71401671
chr15	78287888	rs2921118	TBC1D2B	hcaec	A,C,T	-	145.4/10.8
chr15	78288489	rs139941936
chr15	85747440	rs374098225	RP11-561C5.4	hcaec	-	-	58.2/1.7
chr15	89442177	rs8530	MFGE8	hcasmc	A,C,T	CAD A,T	105/120.2
chr16	11444715	rs2032932	RMI2	hcasmc	A,C,T	-	22.4/5
chr16	11444725	rs6498185
chr16	21416113	rs200988997	NPIPB3	hcaec	A,C,T	-	77.5/6
chr16	28619919	rs1126446	SULT1A1	hcaec	A,C,T	-	38/7
chr16	71956528	rs28701631	IST1	hcaec, hcasmc	A,C,T	-	589/34,220/42
chr16	74655604	rs3202910	RFWD3	hcaec	A,C,T	-	30.2/31.4
chr16	74655633	rs1138860
chr1	67875103	rs35746287	SERBP1	hcaec	A,C,T	-	18/7.7
chr1	67875105	rs3171013
chr17	10223713	rs2074877	MYH13	hcasmc	C	-	23.9/28.6
chr17	38175425	rs1045929	MED24	hcaec	A,C,T	-	28.1/11.8
chr17	40818450	rs1554227	TUBG2	hcaec	A,C,T	-	131/49.9
chr17	44248836	rs553586616	KANSL1	hcasmc	A,C,T	-	48/4.5
chr17	44249198	rs543087095
chr17	45568403	rs554945594	MRPL45P2	hcaec	A,C,T	-	119.8/4
chr17	4576215	rs147763003	PELP1	hcasmc	A,C,T	-	52.2/1.2
chr17	4637395	rs1131456	MED11	hcaec	A,C,T	-	11.7/16.7
chr17	4637697	rs11658971
chr17	4637885	rs1051009
chr17	4638562	rs2277680	CXCL16	hcaec	A,C,T	-	18.6/26.4
chr17	4638736	rs1050998
chr17	4641754	rs1050997
chr17	47903380	rs61749929	KAT7	hcaec	A,C,T	-	143.8/11.8
chr17	703184	rs669578	NXN	hcaec	A,C,T	-	11.5/56.8
chr17	703206	rs538435
chr17	703692	rs542927
chr17	703707	rs666966
chr17	703955	rs3813434
chr17	704016	rs2474695
chr17	77081787	rs4789879	ENGASE	hcaec	A,C,T	-	27.7/4.9
chr17	78078708	rs1800300	GAA	hcaec	A,C,T	-	108/192.5
chr17	78079596	rs1042393
chr17	78091404	rs1126690
chr17	78093548	rs7567
chr17	80899280	rs9390	TBCD	hcaec	A,C,T	-	250/53.1
chr1	78603707	rs585100	GIPC2	hcaec	A,C,T	-	8.7/18.2
chr1	789143	rs373293973	RP11-206L10.11	hcaec	-	-	57.5/9.5
chr1	79355595	rs1061728	ELTD1	hcasmc	-	-	12.9/42.1
chr1	79357359	rs2275902
chr18	121138	rs60038451	ROCK1P1	hcaec	A,C,T	-	46/1.5
chr18	2913578	rs601071	EMILIN2	hcasmc	A,C,T	-	35.7/23.5
chr18	319934	rs12190	COLEC12	hcaec	A,C,T	-	103.3/47.7
chr18	47091806	rs61729804	LIPG	hcasmc	A,C,T	-	311.4/2.5
chr18	47118232	rs41371047
chr18	5245227	rs11877479	LINC00667	hcaec	A,C,T	-	15.1/6.7
chr18	5392652	rs9953490	EPB41L3	hcaec	A,C,T	-	395/87.7
chr18	61564393	rs6098	SERPINB2	hcaec, hcasmc	A,C,T	-	102.1/195.1,23.6/91.2
chr18	61570502	rs6103	SERPINB10	hcaec	-	-	84.1/123.2
chr18	61570528	rs6104
chr18	61570981	rs12102
chr18	71959074	rs76198400	CYB5A	hcaec	A,C,T	-	267.4/44.4
chr18	8639216	rs28498578	RAB12	hcaec	A,C,T	-	33.4/4.6
chr18	8639246	rs75093271
chr1	89474817	rs17433780	GBP3	hcaec	A,C,T	-	303.5/11
chr1	9097240	rs5840	SLC2A5	hcasmc	A,C,T	-	20.2/8.8
chr19	3122944	rs2240565	GNA11	hcaec	A,C,T	-	92.9/128.2
chr1	9325264	rs9435159	H6PD	hcaec	A,C,T	-	129.8/40.7
chr1	9326131	rs17033642
chr1	9330743	rs114812034
chr19	34843760	rs397414	KIAA0355	hcaec	A,C,T	-	10.8/46.9
chr19	38794894	rs2304176	C19orf33	hcaec	A,C,T	-	73/18.9
chr19	39875550	rs10412658	SAMD4B	hcaec	A,C,T	-	14.7/107
chr19	425181	rs61735134	SHC2	hcaec	A,C,T	-	30.4/3.4
chr19	46915181	rs11880658	CCDC8	hcasmc	A,C,T	-	53.4/1.3
chr19	46973980	rs4803960	PNMAL1	hcaec	-	-	3.3/19.6
chr19	46974323	rs3826853
chr19	57006720	rs62122961	ZNF667-AS1	hcaec	A,C,T	-	21.2/3.7
chr19	7977928	rs7247283	MAP2K7	hcaec	A,C,T	-	42/2.5
chr19	8503620	rs1055554	43161	hcaec	A,C,T	-	10.2/14.8
chr20	1895793	rs1135192	SIRPA	hcaec	A,C,T	-	66.4/5.4
chr20	1895795	rs143735290
chr20	1895796	rs146490405
chr20	1895812	rs17855609
chr20	1895814	rs17853846
chr20	1895819	rs17855610
chr20	1895825	rs17855611
chr20	1895834	rs17855612
chr20	1895841	rs17853847
chr20	1896058	rs115287948
chr20	1896059	rs114499682
chr20	35156848	rs6025504	DLGAP4	hcaec	A,C,T	-	16.3/54
chr2	102955467	rs1041973	IL1RL1	hcaec	A,C,T	-	576.5/388
chr2	102960484	rs13001714
chr2	102960583	rs12712142
chr2	102960818	rs13007819
chr2	102961928	rs1946131
chr2	102962349	rs1054096
chr2	114384973	rs372613648	RABL2A	hcaec	A,C,T	-	57.6/3.2
chr2	128620371	rs2261682	AMMECR1L	hcaec	A,C,T	-	36.4/39.5
chr21	40191430	rs457705	ETS2	hcaec	A,C,T	-	202.9/304.1
chr21	42830689	rs1557370	MX1	hcaec	A,C,T	-	33.1/13.8
chr21	42830900	rs60687893
chr21	42830901	rs55992492
chr2	152127010	rs11730	NMI	hcaec	A,C,T	-	62.6/2.7
chr2	172413017	rs2542939	CYBRD1	hcaec	A,C,T	-	48.4/183.9
chr2	172413266	rs2542938
chr2	206988572	rs1044120	NDUFS1	hcaec	A,C,T	-	55.1/31.7
chr2	207041052	rs3732083	GPR1	hcasmc	A,C,T	-	55.7/89.4
chr2	217235182	rs11678310	2019-03-04	hcaec	A,C,T	-	138/14.9
chr22	17660406	rs74446184	CECR1	hcaec	-	-	81.2/0.7
chr22	17660500	rs14332
chr22	17660614	rs75762931
chr22	17661346	rs1139055
chr22	17661507	rs7285420
chr22	17661763	rs7288562
chr22	17661790	rs7285896
chr22	17661921	rs7289697
chr22	17661934	rs11704850
chr22	17662162	rs7290147
chr22	17662792	rs7289170
chr22	18640396	rs9618221	USP18	hcaec	A,C,T	-	202.1/6.8
chr22	18650681	rs3180408
chr22	20394525	rs457751	PI4KAP1	hcaec	-	-	43/15
chr22	20394629	rs2508168
chr22	23659042	rs3876065	BCR	hcaec	A,C,T	-	98.4/19.4
chr22	24325094	rs74487784	GSTT2	hcaec	A,C,T	-	16.8/15.2
chr22	25844094	rs7288843	CRYBB2P1	hcaec	A,C,T	-	25.6/24.4
chr22	25844115	rs7289954		hcaec			43.6/33.8
chr22	25844146	rs3198642		hcaec			61.8/45.5
chr22	25853367	rs6423498		hcasmc			69/47
chr22	35777184	rs2071747	HMOX1	hcaec	A,C,T	-	447.1/4.2
chr2	239007231	rs28576957	SCLY	hcaec	A,C,T	-	19.1/15.9
chr22	45736433	rs1056322	FAM118A	hcasmc	A,C,T	-	69.7/17.9
chr2	44004009	rs2288709	DYNC2LI1	hcaec	A,C,T	-	91.3/81.7
chr2	61372297	rs3213944	C2orf74	hcaec	-	-	31.8/40.8
chr2	68274433	rs77388906	C1D	hcaec, hcasmc	A,C,T	-	238.8/30.2,125.9/16.6
chr2	75118855	rs3732295	HK2	hcasmc	A,C,T	-	35.1/13.9
chr2	91843402	rs112527890	AC027612.6	hcasmc	-	-	62.3/59.5
chr2	9695905	rs12692386	ADAM17	hcaec	A,C,T	-	38.5/8.3
chr2	98127652	rs538343994	ANKRD36B	hcaec	A,C,T	-	14.5/13.5
chr3	100468499	rs1048364	ABI3BP	hcaec	A,C,T	-	338.5/71.2
chr3	100617667	rs34999788
chr3	100617679	rs2245370
chr3	105086044	rs562762257	ALCAM	hcaec	A,C,T	-	597.8/94.2
chr3	111693678	rs3749300	PHLDB2	hcaec, hcasmc	A,C,T	-	280.4/49.9,144.1/40.8
chr3	111693779	rs3749301		hcaec, hcasmc			408.6/71.7,205.6/50.2
chr3	111693784	rs3749302		hcaec, hcasmc			416.7/73.4,209.1/50.1
chr3	111694149	rs73852798		hcaec, hcasmc			171.4/29.4,87.9/20.7
chr3	111694169	rs78129616		hcasmc			87.8/19.7
chr3	111694354	rs17428388		hcasmc			95.3/24.2
chr3	111694781	rs6763390		hcaec			238.8/35.8
chr3	122056431	rs17589	CSTA	hcasmc	A,C,T	-	57.7/57.6
chr3	127410958	rs814130	MGLL	hcaec	A,C,T	-	23.6/40.8
chr3	14986434	rs1142981	FGD5-AS1	hcaec, hcasmc	A,C,T	-	158.5/119,68.8/57.3
chr3	156258004	rs1046666	SSR3	hcaec, hcasmc	A,C,T	-	281.7/3.1,148.4/5.8
chr3	170151547	rs76935838	CLDN11	hcasmc	A,C,T	-	144.1/71.4
chr3	195295781	rs150401209	APOD	hcaec	A,C,T	-	51.4/1.5
chr3	195410686	rs6583274	LINC00969	hcaec	A,C,T	-	65.6/6.2
chr3	195410688	rs6583275
chr3	195712578	rs201192807	SDHAP1	hcaec	A,C,T	-	64/9
chr3	33192691	rs13060097	SUSD5	hcaec	A,C,T	-	26.8/14.6
chr3	33194989	rs6810039		hcaec	A,C,T	-	33/31.6
chr3	40498844	rs2276868	RPL14	hcaec, hcasmc	A,C,T	-	297.8/197.9,118.1/100.4
chr3	40578814	rs6775029	ZNF621	hcaec, hcasmc	A,C,T	-	51.2/4.8,26.9/6
chr3	46501212	rs1126478	LTF	hcasmc	A,C,T	-	72.5/13
chr3	65425593	rs552500635	MAGI1	hcaec	A,C,T	-	33.5/5
chr3	8792654	rs35014760	OXTR	hcaec	A,C,T	-	73.1/26.4
chr3	8792727	rs2324728
chr3	8792845	rs4493422
chr3	8793380	rs9872310
chr3	8793403	rs9872425
chr3	8793408	rs11131147
chr3	8793584	rs237884
chr3	8793723	rs6770632
chr3	98512824	rs14310	ST3GAL6	hcaec	A,C,T	-	26.4/32.9
chr3	98515896	rs7650646	DCBLD2	hcaec	A,C,T	-	63.5/4.8
chr4	103555991	rs2272697	MANBA	hcaec	A,C,T	-	39.7/88
chr4	106290756	rs148302883	PPA2	hcasmc	A,C,T	-	38.2/1.3
chr4	109734196	rs11722257	COL25A1	hcaec	A,C,T	-	23/4.8
chr4	109734308	rs6533389
chr4	110681504	rs2298749	CFI	hcaec	A,C,T	-	137.3/32.6
chr4	120381973	rs7356491	RP11-33B1.1	hcaec	-	-	70.2/6.4
chr4	152020776	rs2280283	RPS3A	hcaec	A,C,T	-	55.6/5.1
chr4	154257510	rs73854659	TRIM2	hcaec	A,C,T	-	34.3/1.2
chr4	183674696	rs17263582	TENM3	hcaec	A,C,T	-	111/5.5
chr4	186456616	rs4862545	PDLIM3	hcaec	A,C,T	-	6.5/54.5
chr4	190862181	rs2411530	FRG1	hcaec	A,C,T	-	241.3/228.2
chr4	42412686	rs12639920	ATP8A1	hcaec	A,C,T	-	18.2/12
chr4	66535990	rs56390132	EPHA5	hcaec	A,C,T	-	31.1/10.7
chr4	70589422	rs11733227	SULT1B1	hcaec	A,C,T	-	193.1/70.3
chr4	74862089	rs352047	CXCL5	hcaec	A,C,T	-	9.6/36.1
chr4	74863996	rs425535
chr4	76568480	rs11097044	G3BP2	hcaec	A,C,T	-	112.7/58.7
chr4	83821323	rs2305876	THAP9-AS1	hcaec	A,C,T	-	179.5/19
chr4	88059696	rs377093348	AFF1	hcaec	A,C,T	-	103.2/26.4
chr4	89607904	rs3737488	HERC3	hcaec	A,C,T	-	101.5/37
chr5	147286012	rs7722926	C5orf46	hcaec	A,C,T	-	424.2/99.2
chr5	147286052	rs115395632
chr5	147286053	rs2250145
chr5	149937738	rs11994	NDST1	hcaec	A,C,T	-	4.6/10.8
chr5	64963472	rs55695090	TRAPPC13	hcaec	A,C,T	-	30.5/9.4
chr5	81569292	rs3738	RPS23	hcaec	A,C,T	-	73.2/26.3
chr5	81569310	rs3739
chr5	81569671	rs55951719
chr6	10398706	rs3734391	TFAP2A	hcaec	A,C,T	-	24.2/3.2
chr6	130761803	rs12200105	TMEM200A	hcaec	A,C,T	-	138.4/22.9
chr6	130761956	rs3813359		hcaec, hcasmc			141.1/24.3,200/74.1
chr6	130763280	rs9492594		hcaec, hcasmc			155.1/3.3,171.7/9.7
chr6	133135885	rs9483504	RPS12	hcaec	A,C,T	-	3775/2247.5
chr6	134214524	rs12190287	TCF21	hcaec	A,C,T	CAD T	39.2/51.6
chr6	134215778	rs3734281
chr6	134216390	rs9402547
chr6	134216474	rs9389114
chr6	13579827	rs2804911	SIRT5	hcaec	A,C,T	-	79.9/39.3
chr6	151413716	rs11558820	MTHFD1L	hcaec	A,C,T	-	153.7/17.9
chr6	151422954	rs1047665
chr6	153323708	rs3818125	MTRF1L	hcaec	A,C,T	-	24.8/14.2
chr6	170627690	rs9348265	FAM120B	hcaec	A,C,T	-	210.5/14
chr6	170627694	rs113032155
chr6	25969630	rs76757832	TRIM38	hcaec	A,C,T	-	235.9/0.9
chr6	25969634	rs78235403
chr6	28292705	rs9301	ZSCAN31	hcaec	A,C,T	-	17.2/29.5
chr6	28294549	rs853684
chr6	2855450	rs75802081	RP11-420G6.4	hcaec	-	-	60.8/1.4
chr6	33540691	rs145004927	BAK1	hcaec	A,C,T	-	59.6/51.4
chr6	36457483	rs1061632	KCTD20	hcaec	A,C,T	-	192.8/94
chr6	3905682	rs9502088	RP1-140K8.5	hcaec	-	-	32.4/40.3
chr6	3905808	rs4959892
chr6	3906913	rs13194825
chr6	53989525	rs4712056	MLIP	hcaec	A,C,T	-	7.4/36.4
chr6	71298532	rs13654	C6orf57	hcaec	-	-	24.2/12
chr6	86387887	rs1059307	SNHG5	hcaec	A,C,T	-	265.2/2570.6
chr6	96999724	rs1127175	UFL1	hcaec	A,C,T	MIG T	51.8/140
chr7	102739555	rs113835264	ARMC10	hcaec	A,C,T	-	15.1/29.5
chr7	115898441	rs1141470	TES	hcasmc	A,C,T	-	54/115.2
chr7	128140981	rs10257897	METTL2B	hcaec, hcasmc	A,C,T	-	98.3/18,43.4/11.2
chr7	138732456	rs3735008	ZC3HAV1	hcaec	A,C,T	-	72.3/29.8
chr7	150217308	rs3735080	GIMAP7	hcaec	A,C,T	-	107.5/17.6
chr7	16815999	rs2290837	TSPAN13	hcaec	A,C,T	-	37.7/35.3
chr7	37946539	rs1052974	SFRP4	hcaec	A,C,T	-	842.5/8.7
chr7	37947163	rs1802073			NA
chr7	6838726	rs374444147	CCZ1B	hcaec	A,C,T	-	110.6/5.2
chr7	6838884	rs201457485		hcaec, hcasmc			1238.9/84.9,469/30.7
chr7	6859452	rs145992513		hcasmc			39/86.5
chr7	73249298	rs13232463	WBSCR27	hcaec	-	-	18.9/5.4
chr7	76255451	rs62476699	AC004980.7	hcaec	-	-	28/131
chr7	76255490	rs71535586
chr7	94059898	rs1060399	COL1A2	hcaec	A,C,T	-	67.3/66.3
chr8	121408194	rs6650	MRPL13	hcaec	A,C,T	-	75.1/72.6
chr8	123706154	rs4871297	RP11-973F15.1	hcaec	-	-	17/3.8
chr8	146017781	rs2954658	RPL8	hcaec	A,C,T	-	253.5/14
chr8	26363437	rs56024323	PNMA2	hcaec	A,C,T	-	71.3/23.5
chr8	41119553	rs3242	SFRP1	hcaec	A,C,T	-	42.9/22.6
chr8	41121767	rs10088390
chr8	54880467	rs1050471	TCEA1	hcaec	A,C,T	-	235.3/27
chr8	70571530	rs6990375	SULF1	hcaec	A,C,T	-	317.2/59.2
chr8	94808164	rs3134031	TMEM67	hcaec	A,C,T	-	14/21
chr9	111775766	rs7032236	CTNNAL1	hcasmc	A,C,T	-	48.4/4.4
chr9	139256467	rs3812552	GPSM1	hcaec	A,C,T	-	77.8/4.3
chr9	139256494	rs3812553
chr9	139256540	rs3812554
chr9	21005304	rs4129713	PTPLAD2	hcasmc	-	-	17.3/10.6
chr9	43685297	rs62558062	CNTNAP3B	hcaec	A,C,T	-	111.4/18.1
chr9	43828111	rs555608997
chr9	43891509	rs199626952
chr9	69256815	rs62557779	CBWD6	hcaec	-	-	68/20.5
