# Supplementary material for: Genomic profiling of human vascular cells identifies TWIST1 as a causal gene for common vascular diseases
Source: PLoS Genet. 2020 Jan 9;16(1):e1008538. doi: 10.1371/journal.pgen.1008538 (PMC6975560; doi:10.1371/journal.pgen.1008538)
Supplement: S5 Table — (XLSX) [file pgen.1008538.s022.xlsx]

## Sheet: Sheet1
GWAS reported gene(s)	GTEx eGene	GWAS TRAIT	GTEx TISSUE	topgwasSNP	topcolocSNP	PP.H4.abf
ADAMTS7	ADAMTS7	CARDIoGRAMplusC4D	Artery_Aorta	chr15_79169499	15_79141784_T_C_b37	0.955455
			Artery_Tibial	chr15_79169499	15_79141784_T_C_b37	0.902821
			Artery_Coronary	chr15_79169499	15_79124475_C_T_b37	0.825398
	MORF4L1	CARDIoGRAMplusC4D	Artery_Tibial	chr15_79169499	15_79141784_T_C_b37	0.92401
ADAMTSL4, ECM1	ADAMTSL4	Migraine	Artery_Aorta	chr1_150510660	1_150510660_T_C_b37	0.948897
			Artery_Tibial	chr1_150510660	1_150510660_T_C_b37	0.914081
	AL356356.1	Migraine	Artery_Aorta	chr1_150510660	1_150510660_T_C_b37	0.918705
	MRPS21	Migraine	Artery_Tibial	chr1_150510660	1_150322591_C_T_b37	0.751817
			Artery_Aorta	chr1_150510660	1_150322591_C_T_b37	0.723454
ATP2B1	ATP2B1	CARDIoGRAMplusC4D	Artery_Tibial	chr12_90090867	12_90008959_A_G_b37	0.984153
C2ORF43 (LDAH), GDF7	LDAH	AAA_MetaGWAS	Artery_Aorta	chr2_20882449	2_20888265_G_A_b37	0.976872
			Artery_Coronary	chr2_20882449	2_20888265_G_A_b37	0.976213
			Artery_Tibial	chr2_20882449	2_20884586_G_C_b37	0.975837
C7ORF10	AC005160.1	Migraine	Artery_Aorta	chr7_40477363	7_40427634_T_C_b37	0.775639
	LINC01449	Migraine	Artery_Aorta	chr7_40477363	7_40421682_G_A_b37	0.957416
	SUGCT	Migraine	Artery_Aorta	chr7_40477363	7_40477363_G_A_b37	0.95353
			Artery_Tibial	chr7_40477363	7_40417925_G_A_b37	0.712179
CARF	CARF	Migraine	Artery_Tibial	chr2_203832867	2_203768786_G_A_b37	0.778901
	FAM117B	Migraine	Artery_Aorta	chr2_203832867	2_203990789_T_G_b37	0.773643
	ICA1L	Migraine	Artery_Tibial	chr2_203832867	2_203728984_C_T_b37	0.750014
	NBEAL1	Migraine	Artery_Tibial	chr2_203832867	2_203880834_A_G_b37	0.792854
			Artery_Aorta	chr2_203832867	2_203990789_T_G_b37	0.776357
			Artery_Coronary	chr2_203832867	2_203744610_G_A_b37	0.770535
CFDP1	BCAR1	Migraine	Artery_Tibial	chr16_75491327	16_75332041_G_A_b37	0.885459
			Artery_Aorta	chr16_75491327	16_75442143_G_T_b37	0.814414
FGF6	C12ORF4	Migraine	Artery_Tibial	chr12_4529272	12_4527322_T_C_b37	0.994012
	CCND2	Migraine	Artery_Tibial	chr12_4529272	12_4518140_C_G_b37	0.995731
	TIGAR	Migraine	Artery_Tibial	chr12_4529272	12_4523456_T_C_b37	0.753493
FHL5, UFL1, FUT9	FHL5	Migraine	Artery_Aorta	chr6_97067047	6_97035418_C_T_b37	0.754776
	UFL1	Migraine	Artery_Tibial	chr6_97067047	6_97020917_C_A_b37	0.878043
HDAC9	AC003986.2	CARDIoGRAMplusC4D	Artery_Aorta	chr7_19052733	7_19049388_G_A_b37	0.809354
		StrokeMETA_LVD	Artery_Aorta	chr7_19052733	7_19049388_G_A_b37	0.796434
	TWIST1	StrokeMETA_LVD	Artery_Aorta	chr7_19052733	7_19052733_G_A_b37	0.962835
		CARDIoGRAMplusC4D	Artery_Aorta	chr7_19052733	7_19049388_G_A_b37	0.941586
HHIPL1	HHIPL1	CARDIoGRAMplusC4D	Artery_Aorta	chr14_100145710	14_100145710_C_G_b37	0.910712
HPSE2	CNNM1	Migraine	Artery_Tibial	chr10_100733257	10_100702737_G_A_b37	0.854148
	HPSE2	Migraine	Artery_Coronary	chr10_100733257	10_100702737_G_A_b37	0.942063
			Artery_Tibial	chr10_100733257	10_100702737_G_A_b37	0.924402
			Artery_Aorta	chr10_100733257	10_100702737_G_A_b37	0.875796
	RNF213	Migraine	Artery_Tibial	chr17_78269111	17_78246734_C_T_b37	0.901491
			Artery_Aorta	chr17_78269111	17_78262161_T_C_b37	0.763324
IL6R	IL6R	AAA_MetaGWAS	Artery_Tibial	chr1_154428505	1_154417829_C_T_b37	0.792303
		CARDIoGRAMplusC4D	Artery_Tibial	chr1_154428505	1_154407419_A_C_b37	0.759752
ITPK1	ITPK1	Migraine	Artery_Tibial	chr14_93595591	14_93591673_A_G_b37	0.809806
KCNE2	MRPS6	CARDIoGRAMplusC4D	Artery_Aorta	chr21_35682958	21_35593827_G_A_b37	0.817841
KIAA1462 (JCAD)	JCAD	CARDIoGRAMplusC4D	Artery_Tibial	chr10_30335520	10_30335520_G_A_b37	0.878834
			Artery_Aorta	chr10_30335520	10_30327735_T_C_b37	0.775726
LIPA	LIPA	CARDIoGRAMplusC4D	Artery_Aorta	chr10_91014061	10_91007360_T_G_b37	0.959299
LOC105373461, CISD1P1	OSR1	CARDIoGRAMplusC4D	Artery_Tibial	chr2_19942473	2_19942473_G_A_b37	0.963488
LOC260339, RNU4-76P	GJA1	Migraine	Artery_Tibial	chr6_121848841	6_121843598_C_T_b37	0.94811
LRP1	LRP1	AAA_MetaGWAS	Artery_Tibial	chr12_57534912	12_57527283_C_T_b37	0.867957
			Artery_Aorta	chr12_57534912	12_57527283_C_T_b37	0.814211
LRP1, STAT6, SDR9C7	LRP1	Migraine	Artery_Tibial	chr12_57545756	12_57527283_T_C_b37	0.999996
			Artery_Aorta	chr12_57545756	12_57527283_T_C_b37	0.999279
MFGE8, ABHD2	HAPLN3	CARDIoGRAMplusC4D	Artery_Tibial	chr15_89574218	15_89579463_A_G_b37	0.948488
			Artery_Aorta	chr15_89574218	15_89572876_C_G_b37	0.835261
	MFGE8	CARDIoGRAMplusC4D	Artery_Tibial	chr15_89574218	15_89565257_A_C_b37	0.954713
			Artery_Aorta	chr15_89574218	15_89575200_T_C_b37	0.953875
MRAS	ESYT3	CARDIoGRAMplusC4D	Artery_Aorta	chr3_138099161	3_138070901_C_T_b37	0.701067
	MRAS	CARDIoGRAMplusC4D	Artery_Coronary	chr3_138099161	3_138087467_A_C_b37	0.98514
			Artery_Tibial	chr3_138099161	3_138070901_C_T_b37	0.984153
			Artery_Aorta	chr3_138099161	3_138070901_C_T_b37	0.972642
NGF, TSPAN2	NGF	Migraine	Artery_Aorta	chr1_115829943	1_115677183_T_C_b37	0.761896
	TSPAN2	Migraine	Artery_Tibial	chr1_115829943	1_115677946_C_A_b37	0.885071
			Artery_Aorta	chr1_115829943	1_115677946_C_A_b37	0.876945
NOA1, REST	NOA1	Migraine	Artery_Aorta	chr4_57761417	4_57727311_T_C_b37	0.998202
			Artery_Tibial	chr4_57761417	4_57727311_T_C_b37	0.75076
	REST	Migraine	Artery_Tibial	chr4_57761417	4_57727311_T_C_b37	0.906094
PHACTR1	AL008729.1	Migraine	Artery_Tibial	chr6_12948388	6_12903957_A_G_b37	0.970262
		CARDIoGRAMplusC4D	Artery_Tibial	chr6_12987237	6_12903957_A_G_b37	0.848942
	AL008729.2	CARDIoGRAMplusC4D	Artery_Tibial	chr6_12987237	6_12903957_A_G_b37	1
		Migraine	Artery_Tibial	chr6_12948388	6_12903957_A_G_b37	1
		Migraine	Artery_Aorta	chr6_12948388	6_12903957_A_G_b37	0.999981
		CARDIoGRAMplusC4D	Artery_Aorta	chr6_12987237	6_12903957_A_G_b37	0.999977
		Migraine	Artery_Coronary	chr6_12948388	6_12903957_A_G_b37	0.956942
		CARDIoGRAMplusC4D	Artery_Coronary	chr6_12987237	6_12903957_A_G_b37	0.94247
	PHACTR1	CARDIoGRAMplusC4D	Artery_Tibial	chr6_12987237	6_12903957_A_G_b37	1
		Migraine	Artery_Tibial	chr6_12948388	6_12903957_A_G_b37	1
		CARDIoGRAMplusC4D	Artery_Aorta	chr6_12987237	6_12903957_A_G_b37	0.999864
		Migraine	Artery_Aorta	chr6_12948388	6_12903957_A_G_b37	0.99986
		Migraine	Artery_Coronary	chr6_12948388	6_12903957_A_G_b37	0.967899
		CARDIoGRAMplusC4D	Artery_Coronary	chr6_12987237	6_12903957_A_G_b37	0.954547
	TBC1D7	Migraine	Artery_Tibial	chr6_12948388	6_12903957_A_G_b37	0.966573
PLCE1	NOC3L	Migraine	Artery_Aorta	chr10_96074157	10_96014622_C_G_b37	0.824832
	PLCE1-AS1	Migraine	Artery_Tibial	chr10_96074157	10_96012950_G_T_b37	0.751869
SLC24A3	SLC24A3	Migraine	Artery_Aorta	chr20_19568711	20_19469817_G_C_b37	0.969777
	SLC24A3	Migraine	Artery_Tibial	chr20_19568711	20_19469534_G_A_b37	0.955768
	SLC24A3	Migraine	Artery_Coronary	chr20_19568711	20_19469817_G_C_b37	0.774524
TCF21	TCF21	CARDIoGRAMplusC4D	Artery_Tibial	chr6_134226147	6_134202690_T_C_b37	0.705692
VAMP5, VAMP8, GGCX	GGCX	CARDIoGRAMplusC4D	Artery_Aorta	chr2_85812746	2_85762048_A_T_b37	0.968229
			Artery_Tibial	chr2_85812746	2_85794297_T_C_b37	0.937342
ZCCHC14	MAP1LC3B	Migraine	Artery_Tibial	chr16_87579870	16_87578039_A_G_b37	0.808648
	ZCCHC14	Migraine	Artery_Tibial	chr16_87579870	16_87575332_G_A_b37	0.79067
